# Supplementary material for: High variability in the attractiveness of municipally-planted decorative plants to insects
Source: PeerJ. 2024 Nov 6;12:e17762. doi: 10.7717/peerj.17762 (PMC11549908; doi:10.7717/peerj.17762)
Supplement: Supplemental Information 1 [file peerj-12-17762-s001.xlsx]

## Sheet: rawdata
date	location	quadrat	cultivar	morning_afternoon	insect_group	count	coverage_in_%	coverage_in_cm2	insects_m2_full_coverage	total_area_cultivars
2023-08-16	kneippbecken	1	Rudbeckia fulgida	afternoon	Bumblebees	0	56.1051	1346.52	0	498	45154kneippbecken	1
2023-08-16	kneippbecken	1	Rudbeckia fulgida	afternoon	Honey bees	1	56.1051	1346.52	7.42654	498	45154kneippbecken	0
2023-08-16	kneippbecken	1	Rudbeckia fulgida	afternoon	Wild bees	2	56.1051	1346.52	14.8531	498	45154kneippbecken	0
2023-08-16	kneippbecken	1	Rudbeckia fulgida	afternoon	Hover flies	0	56.1051	1346.52	0	498	45154kneippbecken	0
2023-08-16	kneippbecken	1	Rudbeckia fulgida	afternoon	Other flies	0	56.1051	1346.52	0	498	45154kneippbecken	0
2023-08-16	kneippbecken	1	Rudbeckia fulgida	afternoon	Butterflies	0	56.1051	1346.52	0	498	45154kneippbecken	0
2023-08-16	kneippbecken	1	Rudbeckia fulgida	afternoon	Wasps	0	56.1051	1346.52	0	498	45154kneippbecken	0
2023-08-16	kneippbecken	1	Rudbeckia fulgida	afternoon	Beetles	0	56.1051	1346.52	0	498	45154kneippbecken	0
2023-08-16	kneippbecken	1	Rudbeckia fulgida	afternoon	True bugs	0	56.1051	1346.52	0	498	45154kneippbecken	0
2023-08-16	kneippbecken	1	Rudbeckia fulgida	afternoon	Ants	0	56.1051	1346.52	0	498	45154kneippbecken	0
2023-08-16	kneippbecken	2	Bistorta affinis	afternoon	Bumblebees	0	89.8869	2157.28	0	498	45154kneippbecken	0
2023-08-16	kneippbecken	2	Bistorta affinis	afternoon	Honey bees	0	89.8869	2157.28	0	498	45154kneippbecken	0
2023-08-16	kneippbecken	2	Bistorta affinis	afternoon	Wild bees	1	89.8869	2157.28	4.63546	498	45154kneippbecken	0
2023-08-16	kneippbecken	2	Bistorta affinis	afternoon	Hover flies	0	89.8869	2157.28	0	498	45154kneippbecken	0
2023-08-16	kneippbecken	2	Bistorta affinis	afternoon	Other flies	0	89.8869	2157.28	0	498	45154kneippbecken	0
2023-08-16	kneippbecken	2	Bistorta affinis	afternoon	Butterflies	0	89.8869	2157.28	0	498	45154kneippbecken	0
2023-08-16	kneippbecken	2	Bistorta affinis	afternoon	Wasps	0	89.8869	2157.28	0	498	45154kneippbecken	0
2023-08-16	kneippbecken	2	Bistorta affinis	afternoon	Beetles	0	89.8869	2157.28	0	498	45154kneippbecken	0
2023-08-16	kneippbecken	2	Bistorta affinis	afternoon	True bugs	0	89.8869	2157.28	0	498	45154kneippbecken	0
2023-08-16	kneippbecken	2	Bistorta affinis	afternoon	Ants	0	89.8869	2157.28	0	498	45154kneippbecken	0
2023-08-16	kneippbecken	3	Phlox amplifolia	afternoon	Bumblebees	0	79.791	1914.98	0	498	45154kneippbecken	0
2023-08-16	kneippbecken	3	Phlox amplifolia	afternoon	Honey bees	0	79.791	1914.98	0	498	45154kneippbecken	0
2023-08-16	kneippbecken	3	Phlox amplifolia	afternoon	Wild bees	0	79.791	1914.98	0	498	45154kneippbecken	0
2023-08-16	kneippbecken	3	Phlox amplifolia	afternoon	Hover flies	0	79.791	1914.98	0	498	45154kneippbecken	0
2023-08-16	kneippbecken	3	Phlox amplifolia	afternoon	Other flies	0	79.791	1914.98	0	498	45154kneippbecken	0
2023-08-16	kneippbecken	3	Phlox amplifolia	afternoon	Butterflies	0	79.791	1914.98	0	498	45154kneippbecken	0
2023-08-16	kneippbecken	3	Phlox amplifolia	afternoon	Wasps	0	79.791	1914.98	0	498	45154kneippbecken	0
2023-08-16	kneippbecken	3	Phlox amplifolia	afternoon	Beetles	0	79.791	1914.98	0	498	45154kneippbecken	0
2023-08-16	kneippbecken	3	Phlox amplifolia	afternoon	True bugs	0	79.791	1914.98	0	498	45154kneippbecken	0
2023-08-16	kneippbecken	3	Phlox amplifolia	afternoon	Ants	0	79.791	1914.98	0	498	45154kneippbecken	0
2023-08-16	kneippbecken	4	Erynginum planum "Blauer Zwerg"	afternoon	Bumblebees	0	21.9358	526.459	0	498	45154kneippbecken	0
2023-08-16	kneippbecken	4	Erynginum planum "Blauer Zwerg"	afternoon	Honey bees	0	21.9358	526.459	0	498	45154kneippbecken	0
2023-08-16	kneippbecken	4	Erynginum planum "Blauer Zwerg"	afternoon	Wild bees	3	21.9358	526.459	56.9845	498	45154kneippbecken	0
2023-08-16	kneippbecken	4	Erynginum planum "Blauer Zwerg"	afternoon	Hover flies	0	21.9358	526.459	0	498	45154kneippbecken	0
2023-08-16	kneippbecken	4	Erynginum planum "Blauer Zwerg"	afternoon	Other flies	3	21.9358	526.459	56.9845	498	45154kneippbecken	0
2023-08-16	kneippbecken	4	Erynginum planum "Blauer Zwerg"	afternoon	Butterflies	0	21.9358	526.459	0	498	45154kneippbecken	0
2023-08-16	kneippbecken	4	Erynginum planum "Blauer Zwerg"	afternoon	Wasps	1	21.9358	526.459	18.9948	498	45154kneippbecken	0
2023-08-16	kneippbecken	4	Erynginum planum "Blauer Zwerg"	afternoon	Beetles	0	21.9358	526.459	0	498	45154kneippbecken	0
2023-08-16	kneippbecken	4	Erynginum planum "Blauer Zwerg"	afternoon	True bugs	0	21.9358	526.459	0	498	45154kneippbecken	0
2023-08-16	kneippbecken	4	Erynginum planum "Blauer Zwerg"	afternoon	Ants	0	21.9358	526.459	0	498	45154kneippbecken	0
2023-08-16	kneippbecken	5	Erigeron x cultorum	afternoon	Bumblebees	0	51.4066	1233.76	0	498	45154kneippbecken	0
2023-08-16	kneippbecken	5	Erigeron x cultorum	afternoon	Honey bees	0	51.4066	1233.76	0	498	45154kneippbecken	0
2023-08-16	kneippbecken	5	Erigeron x cultorum	afternoon	Wild bees	2	51.4066	1233.76	16.2106	498	45154kneippbecken	0
2023-08-16	kneippbecken	5	Erigeron x cultorum	afternoon	Hover flies	0	51.4066	1233.76	0	498	45154kneippbecken	0
2023-08-16	kneippbecken	5	Erigeron x cultorum	afternoon	Other flies	3	51.4066	1233.76	24.316	498	45154kneippbecken	0
2023-08-16	kneippbecken	5	Erigeron x cultorum	afternoon	Butterflies	0	51.4066	1233.76	0	498	45154kneippbecken	0
2023-08-16	kneippbecken	5	Erigeron x cultorum	afternoon	Wasps	0	51.4066	1233.76	0	498	45154kneippbecken	0
2023-08-16	kneippbecken	5	Erigeron x cultorum	afternoon	Beetles	0	51.4066	1233.76	0	498	45154kneippbecken	0
2023-08-16	kneippbecken	5	Erigeron x cultorum	afternoon	True bugs	0	51.4066	1233.76	0	498	45154kneippbecken	0
2023-08-16	kneippbecken	5	Erigeron x cultorum	afternoon	Ants	0	51.4066	1233.76	0	498	45154kneippbecken	0
2023-08-16	kneippbecken	6	Salvia splendens "Red"	afternoon	Bumblebees	0	81.1363	1947.27	0	498	45154kneippbecken	0
2023-08-16	kneippbecken	6	Salvia splendens "Red"	afternoon	Honey bees	0	81.1363	1947.27	0	498	45154kneippbecken	0
2023-08-16	kneippbecken	6	Salvia splendens "Red"	afternoon	Wild bees	0	81.1363	1947.27	0	498	45154kneippbecken	0
2023-08-16	kneippbecken	6	Salvia splendens "Red"	afternoon	Hover flies	0	81.1363	1947.27	0	498	45154kneippbecken	0
2023-08-16	kneippbecken	6	Salvia splendens "Red"	afternoon	Other flies	0	81.1363	1947.27	0	498	45154kneippbecken	0
2023-08-16	kneippbecken	6	Salvia splendens "Red"	afternoon	Butterflies	0	81.1363	1947.27	0	498	45154kneippbecken	0
2023-08-16	kneippbecken	6	Salvia splendens "Red"	afternoon	Wasps	0	81.1363	1947.27	0	498	45154kneippbecken	0
2023-08-16	kneippbecken	6	Salvia splendens "Red"	afternoon	Beetles	0	81.1363	1947.27	0	498	45154kneippbecken	0
2023-08-16	kneippbecken	6	Salvia splendens "Red"	afternoon	True bugs	0	81.1363	1947.27	0	498	45154kneippbecken	0
2023-08-16	kneippbecken	6	Salvia splendens "Red"	afternoon	Ants	0	81.1363	1947.27	0	498	45154kneippbecken	0
2023-08-16	kneippbecken	7	Erigeron x cultorum	afternoon	Bumblebees	0	40.538	972.912	0	498	45154kneippbecken	0
2023-08-16	kneippbecken	7	Erigeron x cultorum	afternoon	Honey bees	0	40.538	972.912	0	498	45154kneippbecken	0
2023-08-16	kneippbecken	7	Erigeron x cultorum	afternoon	Wild bees	0	40.538	972.912	0	498	45154kneippbecken	0
2023-08-16	kneippbecken	7	Erigeron x cultorum	afternoon	Hover flies	0	40.538	972.912	0	498	45154kneippbecken	0
2023-08-16	kneippbecken	7	Erigeron x cultorum	afternoon	Other flies	0	40.538	972.912	0	498	45154kneippbecken	0
2023-08-16	kneippbecken	7	Erigeron x cultorum	afternoon	Butterflies	0	40.538	972.912	0	498	45154kneippbecken	0
2023-08-16	kneippbecken	7	Erigeron x cultorum	afternoon	Wasps	0	40.538	972.912	0	498	45154kneippbecken	0
2023-08-16	kneippbecken	7	Erigeron x cultorum	afternoon	Beetles	0	40.538	972.912	0	498	45154kneippbecken	0
2023-08-16	kneippbecken	7	Erigeron x cultorum	afternoon	True bugs	0	40.538	972.912	0	498	45154kneippbecken	0
2023-08-16	kneippbecken	7	Erigeron x cultorum	afternoon	Ants	0	40.538	972.912	0	498	45154kneippbecken	0
2023-08-16	kneippbecken	8	Alcaltheae spp.	afternoon	Bumblebees	0	55.8907	1341.38	0	498	45154kneippbecken	0
2023-08-16	kneippbecken	8	Alcaltheae spp.	afternoon	Honey bees	2	55.8907	1341.38	14.91	498	45154kneippbecken	0
2023-08-16	kneippbecken	8	Alcaltheae spp.	afternoon	Wild bees	0	55.8907	1341.38	0	498	45154kneippbecken	0
2023-08-16	kneippbecken	8	Alcaltheae spp.	afternoon	Hover flies	0	55.8907	1341.38	0	498	45154kneippbecken	0
2023-08-16	kneippbecken	8	Alcaltheae spp.	afternoon	Other flies	0	55.8907	1341.38	0	498	45154kneippbecken	0
2023-08-16	kneippbecken	8	Alcaltheae spp.	afternoon	Butterflies	0	55.8907	1341.38	0	498	45154kneippbecken	0
2023-08-16	kneippbecken	8	Alcaltheae spp.	afternoon	Wasps	0	55.8907	1341.38	0	498	45154kneippbecken	0
2023-08-16	kneippbecken	8	Alcaltheae spp.	afternoon	Beetles	0	55.8907	1341.38	0	498	45154kneippbecken	0
2023-08-16	kneippbecken	8	Alcaltheae spp.	afternoon	True bugs	0	55.8907	1341.38	0	498	45154kneippbecken	0
2023-08-16	kneippbecken	8	Alcaltheae spp.	afternoon	Ants	0	55.8907	1341.38	0	498	45154kneippbecken	0
2023-08-16	kneippbecken	9	Tagetes patula "orange"	afternoon	Bumblebees	0	81.274	1950.57	0	498	45154kneippbecken	0
2023-08-16	kneippbecken	9	Tagetes patula "orange"	afternoon	Honey bees	1	81.274	1950.57	5.12669	498	45154kneippbecken	0
2023-08-16	kneippbecken	9	Tagetes patula "orange"	afternoon	Wild bees	2	81.274	1950.57	10.2534	498	45154kneippbecken	0
2023-08-16	kneippbecken	9	Tagetes patula "orange"	afternoon	Hover flies	0	81.274	1950.57	0	498	45154kneippbecken	0
2023-08-16	kneippbecken	9	Tagetes patula "orange"	afternoon	Other flies	0	81.274	1950.57	0	498	45154kneippbecken	0
2023-08-16	kneippbecken	9	Tagetes patula "orange"	afternoon	Butterflies	0	81.274	1950.57	0	498	45154kneippbecken	0
2023-08-16	kneippbecken	9	Tagetes patula "orange"	afternoon	Wasps	0	81.274	1950.57	0	498	45154kneippbecken	0
2023-08-16	kneippbecken	9	Tagetes patula "orange"	afternoon	Beetles	0	81.274	1950.57	0	498	45154kneippbecken	0
2023-08-16	kneippbecken	9	Tagetes patula "orange"	afternoon	True bugs	0	81.274	1950.57	0	498	45154kneippbecken	0
2023-08-16	kneippbecken	9	Tagetes patula "orange"	afternoon	Ants	0	81.274	1950.57	0	498	45154kneippbecken	0
2023-08-16	kneippbecken	10	Salvia splendens "purple"	afternoon	Bumblebees	0	83.9272	2014.25	0	498	45154kneippbecken	0
2023-08-16	kneippbecken	10	Salvia splendens "purple"	afternoon	Honey bees	0	83.9272	2014.25	0	498	45154kneippbecken	0
2023-08-16	kneippbecken	10	Salvia splendens "purple"	afternoon	Wild bees	4	83.9272	2014.25	19.8585	498	45154kneippbecken	0
2023-08-16	kneippbecken	10	Salvia splendens "purple"	afternoon	Hover flies	0	83.9272	2014.25	0	498	45154kneippbecken	0
2023-08-16	kneippbecken	10	Salvia splendens "purple"	afternoon	Other flies	3	83.9272	2014.25	14.8939	498	45154kneippbecken	0
2023-08-16	kneippbecken	10	Salvia splendens "purple"	afternoon	Butterflies	0	83.9272	2014.25	0	498	45154kneippbecken	0
2023-08-16	kneippbecken	10	Salvia splendens "purple"	afternoon	Wasps	0	83.9272	2014.25	0	498	45154kneippbecken	0
2023-08-16	kneippbecken	10	Salvia splendens "purple"	afternoon	Beetles	0	83.9272	2014.25	0	498	45154kneippbecken	0
2023-08-16	kneippbecken	10	Salvia splendens "purple"	afternoon	True bugs	0	83.9272	2014.25	0	498	45154kneippbecken	0
2023-08-16	kneippbecken	10	Salvia splendens "purple"	afternoon	Ants	0	83.9272	2014.25	0	498	45154kneippbecken	0
2023-08-16	kneippbecken	11	Salvia splendens "white"	afternoon	Bumblebees	0	78.0443	1873.06	0	498	45154kneippbecken	0
2023-08-16	kneippbecken	11	Salvia splendens "white"	afternoon	Honey bees	0	78.0443	1873.06	0	498	45154kneippbecken	0
2023-08-16	kneippbecken	11	Salvia splendens "white"	afternoon	Wild bees	0	78.0443	1873.06	0	498	45154kneippbecken	0
2023-08-16	kneippbecken	11	Salvia splendens "white"	afternoon	Hover flies	0	78.0443	1873.06	0	498	45154kneippbecken	0
2023-08-16	kneippbecken	11	Salvia splendens "white"	afternoon	Other flies	0	78.0443	1873.06	0	498	45154kneippbecken	0
2023-08-16	kneippbecken	11	Salvia splendens "white"	afternoon	Butterflies	0	78.0443	1873.06	0	498	45154kneippbecken	0
2023-08-16	kneippbecken	11	Salvia splendens "white"	afternoon	Wasps	0	78.0443	1873.06	0	498	45154kneippbecken	0
2023-08-16	kneippbecken	11	Salvia splendens "white"	afternoon	Beetles	0	78.0443	1873.06	0	498	45154kneippbecken	0
2023-08-16	kneippbecken	11	Salvia splendens "white"	afternoon	True bugs	0	78.0443	1873.06	0	498	45154kneippbecken	0
2023-08-16	kneippbecken	11	Salvia splendens "white"	afternoon	Ants	0	78.0443	1873.06	0	498	45154kneippbecken	0
2023-08-16	kneippbecken	12	Tagetes patula "yellow"	afternoon	Bumblebees	0	91.6326	2199.18	0	498	45154kneippbecken	0
2023-08-16	kneippbecken	12	Tagetes patula "yellow"	afternoon	Honey bees	0	91.6326	2199.18	0	498	45154kneippbecken	0
2023-08-16	kneippbecken	12	Tagetes patula "yellow"	afternoon	Wild bees	0	91.6326	2199.18	0	498	45154kneippbecken	0
2023-08-16	kneippbecken	12	Tagetes patula "yellow"	afternoon	Hover flies	0	91.6326	2199.18	0	498	45154kneippbecken	0
2023-08-16	kneippbecken	12	Tagetes patula "yellow"	afternoon	Other flies	0	91.6326	2199.18	0	498	45154kneippbecken	0
2023-08-16	kneippbecken	12	Tagetes patula "yellow"	afternoon	Butterflies	0	91.6326	2199.18	0	498	45154kneippbecken	0
2023-08-16	kneippbecken	12	Tagetes patula "yellow"	afternoon	Wasps	0	91.6326	2199.18	0	498	45154kneippbecken	0
2023-08-16	kneippbecken	12	Tagetes patula "yellow"	afternoon	Beetles	0	91.6326	2199.18	0	498	45154kneippbecken	0
2023-08-16	kneippbecken	12	Tagetes patula "yellow"	afternoon	True bugs	0	91.6326	2199.18	0	498	45154kneippbecken	0
2023-08-16	kneippbecken	12	Tagetes patula "yellow"	afternoon	Ants	0	91.6326	2199.18	0	498	45154kneippbecken	0
2023-08-16	kneippbecken	13	Salvia splendens "Red"	afternoon	Bumblebees	0	86.6165	2078.8	0	498	45154kneippbecken	0
2023-08-16	kneippbecken	13	Salvia splendens "Red"	afternoon	Honey bees	0	86.6165	2078.8	0	498	45154kneippbecken	0
2023-08-16	kneippbecken	13	Salvia splendens "Red"	afternoon	Wild bees	0	86.6165	2078.8	0	498	45154kneippbecken	0
2023-08-16	kneippbecken	13	Salvia splendens "Red"	afternoon	Hover flies	0	86.6165	2078.8	0	498	45154kneippbecken	0
2023-08-16	kneippbecken	13	Salvia splendens "Red"	afternoon	Other flies	0	86.6165	2078.8	0	498	45154kneippbecken	0
2023-08-16	kneippbecken	13	Salvia splendens "Red"	afternoon	Butterflies	0	86.6165	2078.8	0	498	45154kneippbecken	0
2023-08-16	kneippbecken	13	Salvia splendens "Red"	afternoon	Wasps	0	86.6165	2078.8	0	498	45154kneippbecken	0
2023-08-16	kneippbecken	13	Salvia splendens "Red"	afternoon	Beetles	0	86.6165	2078.8	0	498	45154kneippbecken	0
2023-08-16	kneippbecken	13	Salvia splendens "Red"	afternoon	True bugs	0	86.6165	2078.8	0	498	45154kneippbecken	0
2023-08-16	kneippbecken	13	Salvia splendens "Red"	afternoon	Ants	0	86.6165	2078.8	0	498	45154kneippbecken	0
2023-08-16	kneippbecken	14	Nepeta grandiflora	afternoon	Bumblebees	0	89.466	2147.19	0	498	45154kneippbecken	0
2023-08-16	kneippbecken	14	Nepeta grandiflora	afternoon	Honey bees	0	89.466	2147.19	0	498	45154kneippbecken	0
2023-08-16	kneippbecken	14	Nepeta grandiflora	afternoon	Wild bees	0	89.466	2147.19	0	498	45154kneippbecken	0
2023-08-16	kneippbecken	14	Nepeta grandiflora	afternoon	Hover flies	0	89.466	2147.19	0	498	45154kneippbecken	0
2023-08-16	kneippbecken	14	Nepeta grandiflora	afternoon	Other flies	0	89.466	2147.19	0	498	45154kneippbecken	0
2023-08-16	kneippbecken	14	Nepeta grandiflora	afternoon	Butterflies	0	89.466	2147.19	0	498	45154kneippbecken	0
2023-08-16	kneippbecken	14	Nepeta grandiflora	afternoon	Wasps	0	89.466	2147.19	0	498	45154kneippbecken	0
2023-08-16	kneippbecken	14	Nepeta grandiflora	afternoon	Beetles	0	89.466	2147.19	0	498	45154kneippbecken	0
2023-08-16	kneippbecken	14	Nepeta grandiflora	afternoon	True bugs	0	89.466	2147.19	0	498	45154kneippbecken	0
2023-08-16	kneippbecken	14	Nepeta grandiflora	afternoon	Ants	0	89.466	2147.19	0	498	45154kneippbecken	0
2023-08-16	kneippbecken	15	Echinacea purpurea "pink"	afternoon	Bumblebees	0	73.8306	1771.93	0	498	45154kneippbecken	0
2023-08-16	kneippbecken	15	Echinacea purpurea "pink"	afternoon	Honey bees	0	73.8306	1771.93	0	498	45154kneippbecken	0
2023-08-16	kneippbecken	15	Echinacea purpurea "pink"	afternoon	Wild bees	1	73.8306	1771.93	5.64355	498	45154kneippbecken	0
2023-08-16	kneippbecken	15	Echinacea purpurea "pink"	afternoon	Hover flies	1	73.8306	1771.93	5.64355	498	45154kneippbecken	0
2023-08-16	kneippbecken	15	Echinacea purpurea "pink"	afternoon	Other flies	0	73.8306	1771.93	0	498	45154kneippbecken	0
2023-08-16	kneippbecken	15	Echinacea purpurea "pink"	afternoon	Butterflies	0	73.8306	1771.93	0	498	45154kneippbecken	0
2023-08-16	kneippbecken	15	Echinacea purpurea "pink"	afternoon	Wasps	0	73.8306	1771.93	0	498	45154kneippbecken	0
2023-08-16	kneippbecken	15	Echinacea purpurea "pink"	afternoon	Beetles	0	73.8306	1771.93	0	498	45154kneippbecken	0
2023-08-16	kneippbecken	15	Echinacea purpurea "pink"	afternoon	True bugs	0	73.8306	1771.93	0	498	45154kneippbecken	0
2023-08-16	kneippbecken	15	Echinacea purpurea "pink"	afternoon	Ants	0	73.8306	1771.93	0	498	45154kneippbecken	0
2023-08-16	augsburger_strasse	16	Salvia yangii	afternoon	Bumblebees	0	58.0186	1392.45	0	50	45154augsburger_strasse	1
2023-08-16	augsburger_strasse	16	Salvia yangii	afternoon	Honey bees	9	58.0186	1392.45	64.6344	50	45154augsburger_strasse	0
2023-08-16	augsburger_strasse	16	Salvia yangii	afternoon	Wild bees	0	58.0186	1392.45	0	50	45154augsburger_strasse	0
2023-08-16	augsburger_strasse	16	Salvia yangii	afternoon	Hover flies	0	58.0186	1392.45	0	50	45154augsburger_strasse	0
2023-08-16	augsburger_strasse	16	Salvia yangii	afternoon	Other flies	0	58.0186	1392.45	0	50	45154augsburger_strasse	0
2023-08-16	augsburger_strasse	16	Salvia yangii	afternoon	Butterflies	0	58.0186	1392.45	0	50	45154augsburger_strasse	0
2023-08-16	augsburger_strasse	16	Salvia yangii	afternoon	Wasps	0	58.0186	1392.45	0	50	45154augsburger_strasse	0
2023-08-16	augsburger_strasse	16	Salvia yangii	afternoon	Beetles	0	58.0186	1392.45	0	50	45154augsburger_strasse	0
2023-08-16	augsburger_strasse	16	Salvia yangii	afternoon	True bugs	0	58.0186	1392.45	0	50	45154augsburger_strasse	0
2023-08-16	augsburger_strasse	16	Salvia yangii	afternoon	Ants	0	58.0186	1392.45	0	50	45154augsburger_strasse	0
2023-08-16	augsburger_strasse	17	Achillea filipendulina	afternoon	Bumblebees	0	74.4111	1785.87	0	50	45154augsburger_strasse	0
2023-08-16	augsburger_strasse	17	Achillea filipendulina	afternoon	Honey bees	0	74.4111	1785.87	0	50	45154augsburger_strasse	0
2023-08-16	augsburger_strasse	17	Achillea filipendulina	afternoon	Wild bees	0	74.4111	1785.87	0	50	45154augsburger_strasse	0
2023-08-16	augsburger_strasse	17	Achillea filipendulina	afternoon	Hover flies	0	74.4111	1785.87	0	50	45154augsburger_strasse	0
2023-08-16	augsburger_strasse	17	Achillea filipendulina	afternoon	Other flies	0	74.4111	1785.87	0	50	45154augsburger_strasse	0
2023-08-16	augsburger_strasse	17	Achillea filipendulina	afternoon	Butterflies	0	74.4111	1785.87	0	50	45154augsburger_strasse	0
2023-08-16	augsburger_strasse	17	Achillea filipendulina	afternoon	Wasps	0	74.4111	1785.87	0	50	45154augsburger_strasse	0
2023-08-16	augsburger_strasse	17	Achillea filipendulina	afternoon	Beetles	0	74.4111	1785.87	0	50	45154augsburger_strasse	0
2023-08-16	augsburger_strasse	17	Achillea filipendulina	afternoon	True bugs	0	74.4111	1785.87	0	50	45154augsburger_strasse	0
2023-08-16	augsburger_strasse	17	Achillea filipendulina	afternoon	Ants	0	74.4111	1785.87	0	50	45154augsburger_strasse	0
2023-08-16	augsburger_strasse	18	Hydrangea macrophylla	afternoon	Bumblebees	0	95.4896	2291.75	0	50	45154augsburger_strasse	0
2023-08-16	augsburger_strasse	18	Hydrangea macrophylla	afternoon	Honey bees	0	95.4896	2291.75	0	50	45154augsburger_strasse	0
2023-08-16	augsburger_strasse	18	Hydrangea macrophylla	afternoon	Wild bees	0	95.4896	2291.75	0	50	45154augsburger_strasse	0
2023-08-16	augsburger_strasse	18	Hydrangea macrophylla	afternoon	Hover flies	0	95.4896	2291.75	0	50	45154augsburger_strasse	0
2023-08-16	augsburger_strasse	18	Hydrangea macrophylla	afternoon	Other flies	0	95.4896	2291.75	0	50	45154augsburger_strasse	0
2023-08-16	augsburger_strasse	18	Hydrangea macrophylla	afternoon	Butterflies	0	95.4896	2291.75	0	50	45154augsburger_strasse	0
2023-08-16	augsburger_strasse	18	Hydrangea macrophylla	afternoon	Wasps	0	95.4896	2291.75	0	50	45154augsburger_strasse	0
2023-08-16	augsburger_strasse	18	Hydrangea macrophylla	afternoon	Beetles	0	95.4896	2291.75	0	50	45154augsburger_strasse	0
2023-08-16	augsburger_strasse	18	Hydrangea macrophylla	afternoon	True bugs	0	95.4896	2291.75	0	50	45154augsburger_strasse	0
2023-08-16	augsburger_strasse	18	Hydrangea macrophylla	afternoon	Ants	0	95.4896	2291.75	0	50	45154augsburger_strasse	0
2023-08-16	augsburger_strasse	19	Geranium x magnificum	afternoon	Bumblebees	0	98.3945	2361.47	0	50	45154augsburger_strasse	0
2023-08-16	augsburger_strasse	19	Geranium x magnificum	afternoon	Honey bees	1	98.3945	2361.47	4.23465	50	45154augsburger_strasse	0
2023-08-16	augsburger_strasse	19	Geranium x magnificum	afternoon	Wild bees	3	98.3945	2361.47	12.704	50	45154augsburger_strasse	0
2023-08-16	augsburger_strasse	19	Geranium x magnificum	afternoon	Hover flies	0	98.3945	2361.47	0	50	45154augsburger_strasse	0
2023-08-16	augsburger_strasse	19	Geranium x magnificum	afternoon	Other flies	0	98.3945	2361.47	0	50	45154augsburger_strasse	0
2023-08-16	augsburger_strasse	19	Geranium x magnificum	afternoon	Butterflies	0	98.3945	2361.47	0	50	45154augsburger_strasse	0
2023-08-16	augsburger_strasse	19	Geranium x magnificum	afternoon	Wasps	0	98.3945	2361.47	0	50	45154augsburger_strasse	0
2023-08-16	augsburger_strasse	19	Geranium x magnificum	afternoon	Beetles	0	98.3945	2361.47	0	50	45154augsburger_strasse	0
2023-08-16	augsburger_strasse	19	Geranium x magnificum	afternoon	True bugs	0	98.3945	2361.47	0	50	45154augsburger_strasse	0
2023-08-16	augsburger_strasse	19	Geranium x magnificum	afternoon	Ants	0	98.3945	2361.47	0	50	45154augsburger_strasse	0
2023-08-16	augsburger_strasse	20	Echinacea purpurea "Alba"	afternoon	Bumblebees	0	74.5849	1790.04	0	50	45154augsburger_strasse	0
2023-08-16	augsburger_strasse	20	Echinacea purpurea "Alba"	afternoon	Honey bees	1	74.5849	1790.04	5.58648	50	45154augsburger_strasse	0
2023-08-16	augsburger_strasse	20	Echinacea purpurea "Alba"	afternoon	Wild bees	0	74.5849	1790.04	0	50	45154augsburger_strasse	0
2023-08-16	augsburger_strasse	20	Echinacea purpurea "Alba"	afternoon	Hover flies	0	74.5849	1790.04	0	50	45154augsburger_strasse	0
2023-08-16	augsburger_strasse	20	Echinacea purpurea "Alba"	afternoon	Other flies	0	74.5849	1790.04	0	50	45154augsburger_strasse	0
2023-08-16	augsburger_strasse	20	Echinacea purpurea "Alba"	afternoon	Butterflies	0	74.5849	1790.04	0	50	45154augsburger_strasse	0
2023-08-16	augsburger_strasse	20	Echinacea purpurea "Alba"	afternoon	Wasps	0	74.5849	1790.04	0	50	45154augsburger_strasse	0
2023-08-16	augsburger_strasse	20	Echinacea purpurea "Alba"	afternoon	Beetles	0	74.5849	1790.04	0	50	45154augsburger_strasse	0
2023-08-16	augsburger_strasse	20	Echinacea purpurea "Alba"	afternoon	True bugs	0	74.5849	1790.04	0	50	45154augsburger_strasse	0
2023-08-16	augsburger_strasse	20	Echinacea purpurea "Alba"	afternoon	Ants	0	74.5849	1790.04	0	50	45154augsburger_strasse	0
2023-08-16	augsburger_strasse	21	Salvia farianacea	afternoon	Bumblebees	0	64.2786	1542.69	0	50	45154augsburger_strasse	0
2023-08-16	augsburger_strasse	21	Salvia farianacea	afternoon	Honey bees	5	64.2786	1542.69	32.411	50	45154augsburger_strasse	0
2023-08-16	augsburger_strasse	21	Salvia farianacea	afternoon	Wild bees	0	64.2786	1542.69	0	50	45154augsburger_strasse	0
2023-08-16	augsburger_strasse	21	Salvia farianacea	afternoon	Hover flies	0	64.2786	1542.69	0	50	45154augsburger_strasse	0
2023-08-16	augsburger_strasse	21	Salvia farianacea	afternoon	Other flies	0	64.2786	1542.69	0	50	45154augsburger_strasse	0
2023-08-16	augsburger_strasse	21	Salvia farianacea	afternoon	Butterflies	0	64.2786	1542.69	0	50	45154augsburger_strasse	0
2023-08-16	augsburger_strasse	21	Salvia farianacea	afternoon	Wasps	0	64.2786	1542.69	0	50	45154augsburger_strasse	0
2023-08-16	augsburger_strasse	21	Salvia farianacea	afternoon	Beetles	0	64.2786	1542.69	0	50	45154augsburger_strasse	0
2023-08-16	augsburger_strasse	21	Salvia farianacea	afternoon	True bugs	0	64.2786	1542.69	0	50	45154augsburger_strasse	0
2023-08-16	augsburger_strasse	21	Salvia farianacea	afternoon	Ants	0	64.2786	1542.69	0	50	45154augsburger_strasse	0
2023-08-16	augsburger_strasse	22	Echinacea purpurea "pink"	afternoon	Bumblebees	0	61.5618	1477.48	0	50	45154augsburger_strasse	0
2023-08-16	augsburger_strasse	22	Echinacea purpurea "pink"	afternoon	Honey bees	1	61.5618	1477.48	6.76827	50	45154augsburger_strasse	0
2023-08-16	augsburger_strasse	22	Echinacea purpurea "pink"	afternoon	Wild bees	1	61.5618	1477.48	6.76827	50	45154augsburger_strasse	0
2023-08-16	augsburger_strasse	22	Echinacea purpurea "pink"	afternoon	Hover flies	0	61.5618	1477.48	0	50	45154augsburger_strasse	0
2023-08-16	augsburger_strasse	22	Echinacea purpurea "pink"	afternoon	Other flies	0	61.5618	1477.48	0	50	45154augsburger_strasse	0
2023-08-16	augsburger_strasse	22	Echinacea purpurea "pink"	afternoon	Butterflies	0	61.5618	1477.48	0	50	45154augsburger_strasse	0
2023-08-16	augsburger_strasse	22	Echinacea purpurea "pink"	afternoon	Wasps	0	61.5618	1477.48	0	50	45154augsburger_strasse	0
2023-08-16	augsburger_strasse	22	Echinacea purpurea "pink"	afternoon	Beetles	0	61.5618	1477.48	0	50	45154augsburger_strasse	0
2023-08-16	augsburger_strasse	22	Echinacea purpurea "pink"	afternoon	True bugs	0	61.5618	1477.48	0	50	45154augsburger_strasse	0
2023-08-16	augsburger_strasse	22	Echinacea purpurea "pink"	afternoon	Ants	0	61.5618	1477.48	0	50	45154augsburger_strasse	0
2023-08-16	augsburger_strasse	23	Rudbeckia fulgida	afternoon	Bumblebees	0	88.3246	2119.79	0	50	45154augsburger_strasse	0
2023-08-16	augsburger_strasse	23	Rudbeckia fulgida	afternoon	Honey bees	0	88.3246	2119.79	0	50	45154augsburger_strasse	0
2023-08-16	augsburger_strasse	23	Rudbeckia fulgida	afternoon	Wild bees	5	88.3246	2119.79	23.5872	50	45154augsburger_strasse	0
2023-08-16	augsburger_strasse	23	Rudbeckia fulgida	afternoon	Hover flies	0	88.3246	2119.79	0	50	45154augsburger_strasse	0
2023-08-16	augsburger_strasse	23	Rudbeckia fulgida	afternoon	Other flies	0	88.3246	2119.79	0	50	45154augsburger_strasse	0
2023-08-16	augsburger_strasse	23	Rudbeckia fulgida	afternoon	Butterflies	0	88.3246	2119.79	0	50	45154augsburger_strasse	0
2023-08-16	augsburger_strasse	23	Rudbeckia fulgida	afternoon	Wasps	0	88.3246	2119.79	0	50	45154augsburger_strasse	0
2023-08-16	augsburger_strasse	23	Rudbeckia fulgida	afternoon	Beetles	0	88.3246	2119.79	0	50	45154augsburger_strasse	0
2023-08-16	augsburger_strasse	23	Rudbeckia fulgida	afternoon	True bugs	0	88.3246	2119.79	0	50	45154augsburger_strasse	0
2023-08-16	augsburger_strasse	23	Rudbeckia fulgida	afternoon	Ants	0	88.3246	2119.79	0	50	45154augsburger_strasse	0
2023-08-16	augsburger_strasse	24	Aster ageratoides	afternoon	Bumblebees	0	100	2400	0	50	45154augsburger_strasse	0
2023-08-16	augsburger_strasse	24	Aster ageratoides	afternoon	Honey bees	2	100	2400	8.33333	50	45154augsburger_strasse	0
2023-08-16	augsburger_strasse	24	Aster ageratoides	afternoon	Wild bees	7	100	2400	29.1667	50	45154augsburger_strasse	0
2023-08-16	augsburger_strasse	24	Aster ageratoides	afternoon	Hover flies	0	100	2400	0	50	45154augsburger_strasse	0
2023-08-16	augsburger_strasse	24	Aster ageratoides	afternoon	Other flies	0	100	2400	0	50	45154augsburger_strasse	0
2023-08-16	augsburger_strasse	24	Aster ageratoides	afternoon	Butterflies	0	100	2400	0	50	45154augsburger_strasse	0
2023-08-16	augsburger_strasse	24	Aster ageratoides	afternoon	Wasps	0	100	2400	0	50	45154augsburger_strasse	0
2023-08-16	augsburger_strasse	24	Aster ageratoides	afternoon	Beetles	0	100	2400	0	50	45154augsburger_strasse	0
2023-08-16	augsburger_strasse	24	Aster ageratoides	afternoon	True bugs	0	100	2400	0	50	45154augsburger_strasse	0
2023-08-16	augsburger_strasse	24	Aster ageratoides	afternoon	Ants	0	100	2400	0	50	45154augsburger_strasse	0
2023-08-16	augsburger_strasse	25	Echinacea purpurea "Alba"	afternoon	Bumblebees	0	78.524	1884.58	0	50	45154augsburger_strasse	0
2023-08-16	augsburger_strasse	25	Echinacea purpurea "Alba"	afternoon	Honey bees	1	78.524	1884.58	5.30623	50	45154augsburger_strasse	0
2023-08-16	augsburger_strasse	25	Echinacea purpurea "Alba"	afternoon	Wild bees	1	78.524	1884.58	5.30623	50	45154augsburger_strasse	0
2023-08-16	augsburger_strasse	25	Echinacea purpurea "Alba"	afternoon	Hover flies	0	78.524	1884.58	0	50	45154augsburger_strasse	0
2023-08-16	augsburger_strasse	25	Echinacea purpurea "Alba"	afternoon	Other flies	0	78.524	1884.58	0	50	45154augsburger_strasse	0
2023-08-16	augsburger_strasse	25	Echinacea purpurea "Alba"	afternoon	Butterflies	0	78.524	1884.58	0	50	45154augsburger_strasse	0
2023-08-16	augsburger_strasse	25	Echinacea purpurea "Alba"	afternoon	Wasps	0	78.524	1884.58	0	50	45154augsburger_strasse	0
2023-08-16	augsburger_strasse	25	Echinacea purpurea "Alba"	afternoon	Beetles	0	78.524	1884.58	0	50	45154augsburger_strasse	0
2023-08-16	augsburger_strasse	25	Echinacea purpurea "Alba"	afternoon	True bugs	0	78.524	1884.58	0	50	45154augsburger_strasse	0
2023-08-16	augsburger_strasse	25	Echinacea purpurea "Alba"	afternoon	Ants	0	78.524	1884.58	0	50	45154augsburger_strasse	0
2023-08-17	albertstrasse	1	Cleome spinosa	morning	Bumblebees	0	84.2495	2021.99	0	623	45155albertstrasse	1
2023-08-17	albertstrasse	1	Cleome spinosa	morning	Honey bees	0	84.2495	2021.99	0	623	45155albertstrasse	0
2023-08-17	albertstrasse	1	Cleome spinosa	morning	Wild bees	0	84.2495	2021.99	0	623	45155albertstrasse	0
2023-08-17	albertstrasse	1	Cleome spinosa	morning	Hover flies	0	84.2495	2021.99	0	623	45155albertstrasse	0
2023-08-17	albertstrasse	1	Cleome spinosa	morning	Other flies	0	84.2495	2021.99	0	623	45155albertstrasse	0
2023-08-17	albertstrasse	1	Cleome spinosa	morning	Butterflies	0	84.2495	2021.99	0	623	45155albertstrasse	0
2023-08-17	albertstrasse	1	Cleome spinosa	morning	Wasps	0	84.2495	2021.99	0	623	45155albertstrasse	0
2023-08-17	albertstrasse	1	Cleome spinosa	morning	Beetles	0	84.2495	2021.99	0	623	45155albertstrasse	0
2023-08-17	albertstrasse	1	Cleome spinosa	morning	True bugs	0	84.2495	2021.99	0	623	45155albertstrasse	0
2023-08-17	albertstrasse	1	Cleome spinosa	morning	Ants	0	84.2495	2021.99	0	623	45155albertstrasse	0
2023-08-17	albertstrasse	2	Canna indica	morning	Bumblebees	0	47.5393	1140.94	0	623	45155albertstrasse	0
2023-08-17	albertstrasse	2	Canna indica	morning	Honey bees	0	47.5393	1140.94	0	623	45155albertstrasse	0
2023-08-17	albertstrasse	2	Canna indica	morning	Wild bees	0	47.5393	1140.94	0	623	45155albertstrasse	0
2023-08-17	albertstrasse	2	Canna indica	morning	Hover flies	0	47.5393	1140.94	0	623	45155albertstrasse	0
2023-08-17	albertstrasse	2	Canna indica	morning	Other flies	0	47.5393	1140.94	0	623	45155albertstrasse	0
2023-08-17	albertstrasse	2	Canna indica	morning	Butterflies	0	47.5393	1140.94	0	623	45155albertstrasse	0
2023-08-17	albertstrasse	2	Canna indica	morning	Wasps	0	47.5393	1140.94	0	623	45155albertstrasse	0
2023-08-17	albertstrasse	2	Canna indica	morning	Beetles	0	47.5393	1140.94	0	623	45155albertstrasse	0
2023-08-17	albertstrasse	2	Canna indica	morning	True bugs	0	47.5393	1140.94	0	623	45155albertstrasse	0
2023-08-17	albertstrasse	2	Canna indica	morning	Ants	0	47.5393	1140.94	0	623	45155albertstrasse	0
2023-08-17	albertstrasse	3	Galinsoga parviflora	morning	Bumblebees	0	100	2400	0	623	45155albertstrasse	0
2023-08-17	albertstrasse	3	Galinsoga parviflora	morning	Honey bees	0	100	2400	0	623	45155albertstrasse	0
2023-08-17	albertstrasse	3	Galinsoga parviflora	morning	Wild bees	0	100	2400	0	623	45155albertstrasse	0
2023-08-17	albertstrasse	3	Galinsoga parviflora	morning	Hover flies	0	100	2400	0	623	45155albertstrasse	0
2023-08-17	albertstrasse	3	Galinsoga parviflora	morning	Other flies	0	100	2400	0	623	45155albertstrasse	0
2023-08-17	albertstrasse	3	Galinsoga parviflora	morning	Butterflies	0	100	2400	0	623	45155albertstrasse	0
2023-08-17	albertstrasse	3	Galinsoga parviflora	morning	Wasps	0	100	2400	0	623	45155albertstrasse	0
2023-08-17	albertstrasse	3	Galinsoga parviflora	morning	Beetles	0	100	2400	0	623	45155albertstrasse	0
2023-08-17	albertstrasse	3	Galinsoga parviflora	morning	True bugs	0	100	2400	0	623	45155albertstrasse	0
2023-08-17	albertstrasse	3	Galinsoga parviflora	morning	Ants	0	100	2400	0	623	45155albertstrasse	0
2023-08-17	albertstrasse	4	Begonia semperflorens "red"	morning	Bumblebees	0	50.942	1222.61	0	623	45155albertstrasse	0
2023-08-17	albertstrasse	4	Begonia semperflorens "red"	morning	Honey bees	1	50.942	1222.61	8.17924	623	45155albertstrasse	0
2023-08-17	albertstrasse	4	Begonia semperflorens "red"	morning	Wild bees	0	50.942	1222.61	0	623	45155albertstrasse	0
2023-08-17	albertstrasse	4	Begonia semperflorens "red"	morning	Hover flies	0	50.942	1222.61	0	623	45155albertstrasse	0
2023-08-17	albertstrasse	4	Begonia semperflorens "red"	morning	Other flies	0	50.942	1222.61	0	623	45155albertstrasse	0
2023-08-17	albertstrasse	4	Begonia semperflorens "red"	morning	Butterflies	0	50.942	1222.61	0	623	45155albertstrasse	0
2023-08-17	albertstrasse	4	Begonia semperflorens "red"	morning	Wasps	0	50.942	1222.61	0	623	45155albertstrasse	0
2023-08-17	albertstrasse	4	Begonia semperflorens "red"	morning	Beetles	0	50.942	1222.61	0	623	45155albertstrasse	0
2023-08-17	albertstrasse	4	Begonia semperflorens "red"	morning	True bugs	0	50.942	1222.61	0	623	45155albertstrasse	0
2023-08-17	albertstrasse	4	Begonia semperflorens "red"	morning	Ants	0	50.942	1222.61	0	623	45155albertstrasse	0
2023-08-17	albertstrasse	5	Begonia semperflorens "white"	morning	Bumblebees	0	47.7898	1146.95	0	623	45155albertstrasse	0
2023-08-17	albertstrasse	5	Begonia semperflorens "white"	morning	Honey bees	0	47.7898	1146.95	0	623	45155albertstrasse	0
2023-08-17	albertstrasse	5	Begonia semperflorens "white"	morning	Wild bees	0	47.7898	1146.95	0	623	45155albertstrasse	0
2023-08-17	albertstrasse	5	Begonia semperflorens "white"	morning	Hover flies	0	47.7898	1146.95	0	623	45155albertstrasse	0
2023-08-17	albertstrasse	5	Begonia semperflorens "white"	morning	Other flies	0	47.7898	1146.95	0	623	45155albertstrasse	0
2023-08-17	albertstrasse	5	Begonia semperflorens "white"	morning	Butterflies	0	47.7898	1146.95	0	623	45155albertstrasse	0
2023-08-17	albertstrasse	5	Begonia semperflorens "white"	morning	Wasps	0	47.7898	1146.95	0	623	45155albertstrasse	0
2023-08-17	albertstrasse	5	Begonia semperflorens "white"	morning	Beetles	0	47.7898	1146.95	0	623	45155albertstrasse	0
2023-08-17	albertstrasse	5	Begonia semperflorens "white"	morning	True bugs	0	47.7898	1146.95	0	623	45155albertstrasse	0
2023-08-17	albertstrasse	5	Begonia semperflorens "white"	morning	Ants	0	47.7898	1146.95	0	623	45155albertstrasse	0
2023-08-17	albertstrasse	6	Salvia splendens "white"	morning	Bumblebees	0	51.0752	1225.8	0	623	45155albertstrasse	0
2023-08-17	albertstrasse	6	Salvia splendens "white"	morning	Honey bees	0	51.0752	1225.8	0	623	45155albertstrasse	0
2023-08-17	albertstrasse	6	Salvia splendens "white"	morning	Wild bees	0	51.0752	1225.8	0	623	45155albertstrasse	0
2023-08-17	albertstrasse	6	Salvia splendens "white"	morning	Hover flies	0	51.0752	1225.8	0	623	45155albertstrasse	0
2023-08-17	albertstrasse	6	Salvia splendens "white"	morning	Other flies	1	51.0752	1225.8	8.15791	623	45155albertstrasse	0
2023-08-17	albertstrasse	6	Salvia splendens "white"	morning	Butterflies	0	51.0752	1225.8	0	623	45155albertstrasse	0
2023-08-17	albertstrasse	6	Salvia splendens "white"	morning	Wasps	0	51.0752	1225.8	0	623	45155albertstrasse	0
2023-08-17	albertstrasse	6	Salvia splendens "white"	morning	Beetles	0	51.0752	1225.8	0	623	45155albertstrasse	0
2023-08-17	albertstrasse	6	Salvia splendens "white"	morning	True bugs	0	51.0752	1225.8	0	623	45155albertstrasse	0
2023-08-17	albertstrasse	6	Salvia splendens "white"	morning	Ants	0	51.0752	1225.8	0	623	45155albertstrasse	0
2023-08-17	albertstrasse	7	Salvia splendens "Red"	morning	Bumblebees	0	41.9633	1007.12	0	623	45155albertstrasse	0
2023-08-17	albertstrasse	7	Salvia splendens "Red"	morning	Honey bees	0	41.9633	1007.12	0	623	45155albertstrasse	0
2023-08-17	albertstrasse	7	Salvia splendens "Red"	morning	Wild bees	0	41.9633	1007.12	0	623	45155albertstrasse	0
2023-08-17	albertstrasse	7	Salvia splendens "Red"	morning	Hover flies	0	41.9633	1007.12	0	623	45155albertstrasse	0
2023-08-17	albertstrasse	7	Salvia splendens "Red"	morning	Other flies	0	41.9633	1007.12	0	623	45155albertstrasse	0
2023-08-17	albertstrasse	7	Salvia splendens "Red"	morning	Butterflies	0	41.9633	1007.12	0	623	45155albertstrasse	0
2023-08-17	albertstrasse	7	Salvia splendens "Red"	morning	Wasps	0	41.9633	1007.12	0	623	45155albertstrasse	0
2023-08-17	albertstrasse	7	Salvia splendens "Red"	morning	Beetles	0	41.9633	1007.12	0	623	45155albertstrasse	0
2023-08-17	albertstrasse	7	Salvia splendens "Red"	morning	True bugs	0	41.9633	1007.12	0	623	45155albertstrasse	0
2023-08-17	albertstrasse	7	Salvia splendens "Red"	morning	Ants	0	41.9633	1007.12	0	623	45155albertstrasse	0
2023-08-17	albertstrasse	8	Salvia splendens "purple"	morning	Bumblebees	0	41.4684	995.242	0	623	45155albertstrasse	0
2023-08-17	albertstrasse	8	Salvia splendens "purple"	morning	Honey bees	1	41.4684	995.242	10.0478	623	45155albertstrasse	0
2023-08-17	albertstrasse	8	Salvia splendens "purple"	morning	Wild bees	0	41.4684	995.242	0	623	45155albertstrasse	0
2023-08-17	albertstrasse	8	Salvia splendens "purple"	morning	Hover flies	0	41.4684	995.242	0	623	45155albertstrasse	0
2023-08-17	albertstrasse	8	Salvia splendens "purple"	morning	Other flies	0	41.4684	995.242	0	623	45155albertstrasse	0
2023-08-17	albertstrasse	8	Salvia splendens "purple"	morning	Butterflies	0	41.4684	995.242	0	623	45155albertstrasse	0
2023-08-17	albertstrasse	8	Salvia splendens "purple"	morning	Wasps	0	41.4684	995.242	0	623	45155albertstrasse	0
2023-08-17	albertstrasse	8	Salvia splendens "purple"	morning	Beetles	0	41.4684	995.242	0	623	45155albertstrasse	0
2023-08-17	albertstrasse	8	Salvia splendens "purple"	morning	True bugs	0	41.4684	995.242	0	623	45155albertstrasse	0
2023-08-17	albertstrasse	8	Salvia splendens "purple"	morning	Ants	0	41.4684	995.242	0	623	45155albertstrasse	0
2023-08-17	albertstrasse	9	Galinsoga parviflora	morning	Bumblebees	0	100	2400	0	623	45155albertstrasse	0
2023-08-17	albertstrasse	9	Galinsoga parviflora	morning	Honey bees	0	100	2400	0	623	45155albertstrasse	0
2023-08-17	albertstrasse	9	Galinsoga parviflora	morning	Wild bees	0	100	2400	0	623	45155albertstrasse	0
2023-08-17	albertstrasse	9	Galinsoga parviflora	morning	Hover flies	0	100	2400	0	623	45155albertstrasse	0
2023-08-17	albertstrasse	9	Galinsoga parviflora	morning	Other flies	0	100	2400	0	623	45155albertstrasse	0
2023-08-17	albertstrasse	9	Galinsoga parviflora	morning	Butterflies	0	100	2400	0	623	45155albertstrasse	0
2023-08-17	albertstrasse	9	Galinsoga parviflora	morning	Wasps	0	100	2400	0	623	45155albertstrasse	0
2023-08-17	albertstrasse	9	Galinsoga parviflora	morning	Beetles	0	100	2400	0	623	45155albertstrasse	0
2023-08-17	albertstrasse	9	Galinsoga parviflora	morning	True bugs	0	100	2400	0	623	45155albertstrasse	0
2023-08-17	albertstrasse	9	Galinsoga parviflora	morning	Ants	0	100	2400	0	623	45155albertstrasse	0
2023-08-17	albertstrasse	10	Cleome spinosa	morning	Bumblebees	0	100	2400	0	623	45155albertstrasse	0
2023-08-17	albertstrasse	10	Cleome spinosa	morning	Honey bees	0	100	2400	0	623	45155albertstrasse	0
2023-08-17	albertstrasse	10	Cleome spinosa	morning	Wild bees	0	100	2400	0	623	45155albertstrasse	0
2023-08-17	albertstrasse	10	Cleome spinosa	morning	Hover flies	0	100	2400	0	623	45155albertstrasse	0
2023-08-17	albertstrasse	10	Cleome spinosa	morning	Other flies	0	100	2400	0	623	45155albertstrasse	0
2023-08-17	albertstrasse	10	Cleome spinosa	morning	Butterflies	0	100	2400	0	623	45155albertstrasse	0
2023-08-17	albertstrasse	10	Cleome spinosa	morning	Wasps	0	100	2400	0	623	45155albertstrasse	0
2023-08-17	albertstrasse	10	Cleome spinosa	morning	Beetles	0	100	2400	0	623	45155albertstrasse	0
2023-08-17	albertstrasse	10	Cleome spinosa	morning	True bugs	0	100	2400	0	623	45155albertstrasse	0
2023-08-17	albertstrasse	10	Cleome spinosa	morning	Ants	0	100	2400	0	623	45155albertstrasse	0
2023-08-17	albertstrasse	11	Canna indica	morning	Bumblebees	0	67.8067	1627.36	0	623	45155albertstrasse	0
2023-08-17	albertstrasse	11	Canna indica	morning	Honey bees	0	67.8067	1627.36	0	623	45155albertstrasse	0
2023-08-17	albertstrasse	11	Canna indica	morning	Wild bees	0	67.8067	1627.36	0	623	45155albertstrasse	0
2023-08-17	albertstrasse	11	Canna indica	morning	Hover flies	0	67.8067	1627.36	0	623	45155albertstrasse	0
2023-08-17	albertstrasse	11	Canna indica	morning	Other flies	0	67.8067	1627.36	0	623	45155albertstrasse	0
2023-08-17	albertstrasse	11	Canna indica	morning	Butterflies	0	67.8067	1627.36	0	623	45155albertstrasse	0
2023-08-17	albertstrasse	11	Canna indica	morning	Wasps	0	67.8067	1627.36	0	623	45155albertstrasse	0
2023-08-17	albertstrasse	11	Canna indica	morning	Beetles	0	67.8067	1627.36	0	623	45155albertstrasse	0
2023-08-17	albertstrasse	11	Canna indica	morning	True bugs	0	67.8067	1627.36	0	623	45155albertstrasse	0
2023-08-17	albertstrasse	11	Canna indica	morning	Ants	0	67.8067	1627.36	0	623	45155albertstrasse	0
2023-08-17	albertstrasse	12	Salvia farianacea	morning	Bumblebees	0	78.1106	1874.65	0	623	45155albertstrasse	0
2023-08-17	albertstrasse	12	Salvia farianacea	morning	Honey bees	0	78.1106	1874.65	0	623	45155albertstrasse	0
2023-08-17	albertstrasse	12	Salvia farianacea	morning	Wild bees	0	78.1106	1874.65	0	623	45155albertstrasse	0
2023-08-17	albertstrasse	12	Salvia farianacea	morning	Hover flies	0	78.1106	1874.65	0	623	45155albertstrasse	0
2023-08-17	albertstrasse	12	Salvia farianacea	morning	Other flies	0	78.1106	1874.65	0	623	45155albertstrasse	0
2023-08-17	albertstrasse	12	Salvia farianacea	morning	Butterflies	0	78.1106	1874.65	0	623	45155albertstrasse	0
2023-08-17	albertstrasse	12	Salvia farianacea	morning	Wasps	0	78.1106	1874.65	0	623	45155albertstrasse	0
2023-08-17	albertstrasse	12	Salvia farianacea	morning	Beetles	0	78.1106	1874.65	0	623	45155albertstrasse	0
2023-08-17	albertstrasse	12	Salvia farianacea	morning	True bugs	0	78.1106	1874.65	0	623	45155albertstrasse	0
2023-08-17	albertstrasse	12	Salvia farianacea	morning	Ants	0	78.1106	1874.65	0	623	45155albertstrasse	0
2023-08-17	albertstrasse	13	Salvia splendens "Red"	morning	Bumblebees	0	54.8109	1315.46	0	623	45155albertstrasse	0
2023-08-17	albertstrasse	13	Salvia splendens "Red"	morning	Honey bees	0	54.8109	1315.46	0	623	45155albertstrasse	0
2023-08-17	albertstrasse	13	Salvia splendens "Red"	morning	Wild bees	0	54.8109	1315.46	0	623	45155albertstrasse	0
2023-08-17	albertstrasse	13	Salvia splendens "Red"	morning	Hover flies	0	54.8109	1315.46	0	623	45155albertstrasse	0
2023-08-17	albertstrasse	13	Salvia splendens "Red"	morning	Other flies	0	54.8109	1315.46	0	623	45155albertstrasse	0
2023-08-17	albertstrasse	13	Salvia splendens "Red"	morning	Butterflies	0	54.8109	1315.46	0	623	45155albertstrasse	0
2023-08-17	albertstrasse	13	Salvia splendens "Red"	morning	Wasps	0	54.8109	1315.46	0	623	45155albertstrasse	0
2023-08-17	albertstrasse	13	Salvia splendens "Red"	morning	Beetles	0	54.8109	1315.46	0	623	45155albertstrasse	0
2023-08-17	albertstrasse	13	Salvia splendens "Red"	morning	True bugs	0	54.8109	1315.46	0	623	45155albertstrasse	0
2023-08-17	albertstrasse	13	Salvia splendens "Red"	morning	Ants	0	54.8109	1315.46	0	623	45155albertstrasse	0
2023-08-17	albertstrasse	14	Begonia semperflorens "white"	morning	Bumblebees	0	65.8861	1581.27	0	623	45155albertstrasse	0
2023-08-17	albertstrasse	14	Begonia semperflorens "white"	morning	Honey bees	0	65.8861	1581.27	0	623	45155albertstrasse	0
2023-08-17	albertstrasse	14	Begonia semperflorens "white"	morning	Wild bees	0	65.8861	1581.27	0	623	45155albertstrasse	0
2023-08-17	albertstrasse	14	Begonia semperflorens "white"	morning	Hover flies	0	65.8861	1581.27	0	623	45155albertstrasse	0
2023-08-17	albertstrasse	14	Begonia semperflorens "white"	morning	Other flies	0	65.8861	1581.27	0	623	45155albertstrasse	0
2023-08-17	albertstrasse	14	Begonia semperflorens "white"	morning	Butterflies	0	65.8861	1581.27	0	623	45155albertstrasse	0
2023-08-17	albertstrasse	14	Begonia semperflorens "white"	morning	Wasps	0	65.8861	1581.27	0	623	45155albertstrasse	0
2023-08-17	albertstrasse	14	Begonia semperflorens "white"	morning	Beetles	0	65.8861	1581.27	0	623	45155albertstrasse	0
2023-08-17	albertstrasse	14	Begonia semperflorens "white"	morning	True bugs	0	65.8861	1581.27	0	623	45155albertstrasse	0
2023-08-17	albertstrasse	14	Begonia semperflorens "white"	morning	Ants	0	65.8861	1581.27	0	623	45155albertstrasse	0
2023-08-17	albertstrasse	15	Salvia splendens "purple"	morning	Bumblebees	0	51.2139	1229.13	0	623	45155albertstrasse	0
2023-08-17	albertstrasse	15	Salvia splendens "purple"	morning	Honey bees	0	51.2139	1229.13	0	623	45155albertstrasse	0
2023-08-17	albertstrasse	15	Salvia splendens "purple"	morning	Wild bees	0	51.2139	1229.13	0	623	45155albertstrasse	0
2023-08-17	albertstrasse	15	Salvia splendens "purple"	morning	Hover flies	0	51.2139	1229.13	0	623	45155albertstrasse	0
2023-08-17	albertstrasse	15	Salvia splendens "purple"	morning	Other flies	0	51.2139	1229.13	0	623	45155albertstrasse	0
2023-08-17	albertstrasse	15	Salvia splendens "purple"	morning	Butterflies	0	51.2139	1229.13	0	623	45155albertstrasse	0
2023-08-17	albertstrasse	15	Salvia splendens "purple"	morning	Wasps	0	51.2139	1229.13	0	623	45155albertstrasse	0
2023-08-17	albertstrasse	15	Salvia splendens "purple"	morning	Beetles	0	51.2139	1229.13	0	623	45155albertstrasse	0
2023-08-17	albertstrasse	15	Salvia splendens "purple"	morning	True bugs	0	51.2139	1229.13	0	623	45155albertstrasse	0
2023-08-17	albertstrasse	15	Salvia splendens "purple"	morning	Ants	0	51.2139	1229.13	0	623	45155albertstrasse	0
2023-08-17	albertstrasse	16	Tagetes patula "orange"	morning	Bumblebees	0	37.1654	891.97	0	623	45155albertstrasse	0
2023-08-17	albertstrasse	16	Tagetes patula "orange"	morning	Honey bees	0	37.1654	891.97	0	623	45155albertstrasse	0
2023-08-17	albertstrasse	16	Tagetes patula "orange"	morning	Wild bees	0	37.1654	891.97	0	623	45155albertstrasse	0
2023-08-17	albertstrasse	16	Tagetes patula "orange"	morning	Hover flies	0	37.1654	891.97	0	623	45155albertstrasse	0
2023-08-17	albertstrasse	16	Tagetes patula "orange"	morning	Other flies	1	37.1654	891.97	11.2111	623	45155albertstrasse	0
2023-08-17	albertstrasse	16	Tagetes patula "orange"	morning	Butterflies	0	37.1654	891.97	0	623	45155albertstrasse	0
2023-08-17	albertstrasse	16	Tagetes patula "orange"	morning	Wasps	0	37.1654	891.97	0	623	45155albertstrasse	0
2023-08-17	albertstrasse	16	Tagetes patula "orange"	morning	Beetles	0	37.1654	891.97	0	623	45155albertstrasse	0
2023-08-17	albertstrasse	16	Tagetes patula "orange"	morning	True bugs	0	37.1654	891.97	0	623	45155albertstrasse	0
2023-08-17	albertstrasse	16	Tagetes patula "orange"	morning	Ants	0	37.1654	891.97	0	623	45155albertstrasse	0
2023-08-17	albertstrasse	17	Alcaltheae spp.	morning	Bumblebees	0	74.2666	1782.4	0	623	45155albertstrasse	0
2023-08-17	albertstrasse	17	Alcaltheae spp.	morning	Honey bees	0	74.2666	1782.4	0	623	45155albertstrasse	0
2023-08-17	albertstrasse	17	Alcaltheae spp.	morning	Wild bees	0	74.2666	1782.4	0	623	45155albertstrasse	0
2023-08-17	albertstrasse	17	Alcaltheae spp.	morning	Hover flies	0	74.2666	1782.4	0	623	45155albertstrasse	0
2023-08-17	albertstrasse	17	Alcaltheae spp.	morning	Other flies	0	74.2666	1782.4	0	623	45155albertstrasse	0
2023-08-17	albertstrasse	17	Alcaltheae spp.	morning	Butterflies	0	74.2666	1782.4	0	623	45155albertstrasse	0
2023-08-17	albertstrasse	17	Alcaltheae spp.	morning	Wasps	1	74.2666	1782.4	5.61042	623	45155albertstrasse	0
2023-08-17	albertstrasse	17	Alcaltheae spp.	morning	Beetles	0	74.2666	1782.4	0	623	45155albertstrasse	0
2023-08-17	albertstrasse	17	Alcaltheae spp.	morning	True bugs	0	74.2666	1782.4	0	623	45155albertstrasse	0
2023-08-17	albertstrasse	17	Alcaltheae spp.	morning	Ants	0	74.2666	1782.4	0	623	45155albertstrasse	0
2023-08-17	albertstrasse	18	Galinsoga parviflora	morning	Bumblebees	0	100	2400	0	623	45155albertstrasse	0
2023-08-17	albertstrasse	18	Galinsoga parviflora	morning	Honey bees	0	100	2400	0	623	45155albertstrasse	0
2023-08-17	albertstrasse	18	Galinsoga parviflora	morning	Wild bees	3	100	2400	12.5	623	45155albertstrasse	0
2023-08-17	albertstrasse	18	Galinsoga parviflora	morning	Hover flies	0	100	2400	0	623	45155albertstrasse	0
2023-08-17	albertstrasse	18	Galinsoga parviflora	morning	Other flies	1	100	2400	4.16667	623	45155albertstrasse	0
2023-08-17	albertstrasse	18	Galinsoga parviflora	morning	Butterflies	0	100	2400	0	623	45155albertstrasse	0
2023-08-17	albertstrasse	18	Galinsoga parviflora	morning	Wasps	0	100	2400	0	623	45155albertstrasse	0
2023-08-17	albertstrasse	18	Galinsoga parviflora	morning	Beetles	0	100	2400	0	623	45155albertstrasse	0
2023-08-17	albertstrasse	18	Galinsoga parviflora	morning	True bugs	0	100	2400	0	623	45155albertstrasse	0
2023-08-17	albertstrasse	18	Galinsoga parviflora	morning	Ants	0	100	2400	0	623	45155albertstrasse	0
2023-08-17	albertstrasse	19	Canna indica	morning	Bumblebees	0	50.601	1214.42	0	623	45155albertstrasse	0
2023-08-17	albertstrasse	19	Canna indica	morning	Honey bees	0	50.601	1214.42	0	623	45155albertstrasse	0
2023-08-17	albertstrasse	19	Canna indica	morning	Wild bees	0	50.601	1214.42	0	623	45155albertstrasse	0
2023-08-17	albertstrasse	19	Canna indica	morning	Hover flies	0	50.601	1214.42	0	623	45155albertstrasse	0
2023-08-17	albertstrasse	19	Canna indica	morning	Other flies	1	50.601	1214.42	8.23435	623	45155albertstrasse	0
2023-08-17	albertstrasse	19	Canna indica	morning	Butterflies	0	50.601	1214.42	0	623	45155albertstrasse	0
2023-08-17	albertstrasse	19	Canna indica	morning	Wasps	0	50.601	1214.42	0	623	45155albertstrasse	0
2023-08-17	albertstrasse	19	Canna indica	morning	Beetles	0	50.601	1214.42	0	623	45155albertstrasse	0
2023-08-17	albertstrasse	19	Canna indica	morning	True bugs	0	50.601	1214.42	0	623	45155albertstrasse	0
2023-08-17	albertstrasse	19	Canna indica	morning	Ants	0	50.601	1214.42	0	623	45155albertstrasse	0
2023-08-17	albertstrasse	20	Begonia semperflorens "red"	morning	Bumblebees	0	63.94	1534.56	0	623	45155albertstrasse	0
2023-08-17	albertstrasse	20	Begonia semperflorens "red"	morning	Honey bees	0	63.94	1534.56	0	623	45155albertstrasse	0
2023-08-17	albertstrasse	20	Begonia semperflorens "red"	morning	Wild bees	0	63.94	1534.56	0	623	45155albertstrasse	0
2023-08-17	albertstrasse	20	Begonia semperflorens "red"	morning	Hover flies	0	63.94	1534.56	0	623	45155albertstrasse	0
2023-08-17	albertstrasse	20	Begonia semperflorens "red"	morning	Other flies	1	63.94	1534.56	6.51653	623	45155albertstrasse	0
2023-08-17	albertstrasse	20	Begonia semperflorens "red"	morning	Butterflies	0	63.94	1534.56	0	623	45155albertstrasse	0
2023-08-17	albertstrasse	20	Begonia semperflorens "red"	morning	Wasps	0	63.94	1534.56	0	623	45155albertstrasse	0
2023-08-17	albertstrasse	20	Begonia semperflorens "red"	morning	Beetles	0	63.94	1534.56	0	623	45155albertstrasse	0
2023-08-17	albertstrasse	20	Begonia semperflorens "red"	morning	True bugs	0	63.94	1534.56	0	623	45155albertstrasse	0
2023-08-17	albertstrasse	20	Begonia semperflorens "red"	morning	Ants	0	63.94	1534.56	0	623	45155albertstrasse	0
2023-08-17	albertstrasse	21	Petunia cultivars "Nightsky"	morning	Bumblebees	0	44.3035	1063.28	0	623	45155albertstrasse	0
2023-08-17	albertstrasse	21	Petunia cultivars "Nightsky"	morning	Honey bees	0	44.3035	1063.28	0	623	45155albertstrasse	0
2023-08-17	albertstrasse	21	Petunia cultivars "Nightsky"	morning	Wild bees	0	44.3035	1063.28	0	623	45155albertstrasse	0
2023-08-17	albertstrasse	21	Petunia cultivars "Nightsky"	morning	Hover flies	0	44.3035	1063.28	0	623	45155albertstrasse	0
2023-08-17	albertstrasse	21	Petunia cultivars "Nightsky"	morning	Other flies	0	44.3035	1063.28	0	623	45155albertstrasse	0
2023-08-17	albertstrasse	21	Petunia cultivars "Nightsky"	morning	Butterflies	0	44.3035	1063.28	0	623	45155albertstrasse	0
2023-08-17	albertstrasse	21	Petunia cultivars "Nightsky"	morning	Wasps	0	44.3035	1063.28	0	623	45155albertstrasse	0
2023-08-17	albertstrasse	21	Petunia cultivars "Nightsky"	morning	Beetles	0	44.3035	1063.28	0	623	45155albertstrasse	0
2023-08-17	albertstrasse	21	Petunia cultivars "Nightsky"	morning	True bugs	0	44.3035	1063.28	0	623	45155albertstrasse	0
2023-08-17	albertstrasse	21	Petunia cultivars "Nightsky"	morning	Ants	0	44.3035	1063.28	0	623	45155albertstrasse	0
2023-08-17	albertstrasse	22	Tagetes patula "yellow"	morning	Bumblebees	0	33.1913	796.591	0	623	45155albertstrasse	0
2023-08-17	albertstrasse	22	Tagetes patula "yellow"	morning	Honey bees	0	33.1913	796.591	0	623	45155albertstrasse	0
2023-08-17	albertstrasse	22	Tagetes patula "yellow"	morning	Wild bees	2	33.1913	796.591	25.107	623	45155albertstrasse	0
2023-08-17	albertstrasse	22	Tagetes patula "yellow"	morning	Hover flies	0	33.1913	796.591	0	623	45155albertstrasse	0
2023-08-17	albertstrasse	22	Tagetes patula "yellow"	morning	Other flies	0	33.1913	796.591	0	623	45155albertstrasse	0
2023-08-17	albertstrasse	22	Tagetes patula "yellow"	morning	Butterflies	0	33.1913	796.591	0	623	45155albertstrasse	0
2023-08-17	albertstrasse	22	Tagetes patula "yellow"	morning	Wasps	0	33.1913	796.591	0	623	45155albertstrasse	0
2023-08-17	albertstrasse	22	Tagetes patula "yellow"	morning	Beetles	0	33.1913	796.591	0	623	45155albertstrasse	0
2023-08-17	albertstrasse	22	Tagetes patula "yellow"	morning	True bugs	0	33.1913	796.591	0	623	45155albertstrasse	0
2023-08-17	albertstrasse	22	Tagetes patula "yellow"	morning	Ants	0	33.1913	796.591	0	623	45155albertstrasse	0
2023-08-17	albertstrasse	23	Salvia farianacea	morning	Bumblebees	0	62.8157	1507.58	0	623	45155albertstrasse	0
2023-08-17	albertstrasse	23	Salvia farianacea	morning	Honey bees	1	62.8157	1507.58	6.63316	623	45155albertstrasse	0
2023-08-17	albertstrasse	23	Salvia farianacea	morning	Wild bees	4	62.8157	1507.58	26.5326	623	45155albertstrasse	0
2023-08-17	albertstrasse	23	Salvia farianacea	morning	Hover flies	0	62.8157	1507.58	0	623	45155albertstrasse	0
2023-08-17	albertstrasse	23	Salvia farianacea	morning	Other flies	0	62.8157	1507.58	0	623	45155albertstrasse	0
2023-08-17	albertstrasse	23	Salvia farianacea	morning	Butterflies	0	62.8157	1507.58	0	623	45155albertstrasse	0
2023-08-17	albertstrasse	23	Salvia farianacea	morning	Wasps	0	62.8157	1507.58	0	623	45155albertstrasse	0
2023-08-17	albertstrasse	23	Salvia farianacea	morning	Beetles	0	62.8157	1507.58	0	623	45155albertstrasse	0
2023-08-17	albertstrasse	23	Salvia farianacea	morning	True bugs	0	62.8157	1507.58	0	623	45155albertstrasse	0
2023-08-17	albertstrasse	23	Salvia farianacea	morning	Ants	0	62.8157	1507.58	0	623	45155albertstrasse	0
2023-08-17	albertstrasse	24	Petunia cultivars "Nightsky"	morning	Bumblebees	1	59.7818	1434.76	6.96979	623	45155albertstrasse	0
2023-08-17	albertstrasse	24	Petunia cultivars "Nightsky"	morning	Honey bees	0	59.7818	1434.76	0	623	45155albertstrasse	0
2023-08-17	albertstrasse	24	Petunia cultivars "Nightsky"	morning	Wild bees	0	59.7818	1434.76	0	623	45155albertstrasse	0
2023-08-17	albertstrasse	24	Petunia cultivars "Nightsky"	morning	Hover flies	0	59.7818	1434.76	0	623	45155albertstrasse	0
2023-08-17	albertstrasse	24	Petunia cultivars "Nightsky"	morning	Other flies	0	59.7818	1434.76	0	623	45155albertstrasse	0
2023-08-17	albertstrasse	24	Petunia cultivars "Nightsky"	morning	Butterflies	0	59.7818	1434.76	0	623	45155albertstrasse	0
2023-08-17	albertstrasse	24	Petunia cultivars "Nightsky"	morning	Wasps	0	59.7818	1434.76	0	623	45155albertstrasse	0
2023-08-17	albertstrasse	24	Petunia cultivars "Nightsky"	morning	Beetles	0	59.7818	1434.76	0	623	45155albertstrasse	0
2023-08-17	albertstrasse	24	Petunia cultivars "Nightsky"	morning	True bugs	0	59.7818	1434.76	0	623	45155albertstrasse	0
2023-08-17	albertstrasse	24	Petunia cultivars "Nightsky"	morning	Ants	0	59.7818	1434.76	0	623	45155albertstrasse	0
2023-08-17	albertstrasse	25	Begonia semperflorens "white"	morning	Bumblebees	0	100	2400	0	623	45155albertstrasse	0
2023-08-17	albertstrasse	25	Begonia semperflorens "white"	morning	Honey bees	0	100	2400	0	623	45155albertstrasse	0
2023-08-17	albertstrasse	25	Begonia semperflorens "white"	morning	Wild bees	0	100	2400	0	623	45155albertstrasse	0
2023-08-17	albertstrasse	25	Begonia semperflorens "white"	morning	Hover flies	0	100	2400	0	623	45155albertstrasse	0
2023-08-17	albertstrasse	25	Begonia semperflorens "white"	morning	Other flies	0	100	2400	0	623	45155albertstrasse	0
2023-08-17	albertstrasse	25	Begonia semperflorens "white"	morning	Butterflies	0	100	2400	0	623	45155albertstrasse	0
2023-08-17	albertstrasse	25	Begonia semperflorens "white"	morning	Wasps	0	100	2400	0	623	45155albertstrasse	0
2023-08-17	albertstrasse	25	Begonia semperflorens "white"	morning	Beetles	0	100	2400	0	623	45155albertstrasse	0
2023-08-17	albertstrasse	25	Begonia semperflorens "white"	morning	True bugs	0	100	2400	0	623	45155albertstrasse	0
2023-08-17	albertstrasse	25	Begonia semperflorens "white"	morning	Ants	0	100	2400	0	623	45155albertstrasse	0
2023-08-17	albertstrasse	26	Cleome spinosa	morning	Bumblebees	0	100	2400	0	623	45155albertstrasse	0
2023-08-17	albertstrasse	26	Cleome spinosa	morning	Honey bees	0	100	2400	0	623	45155albertstrasse	0
2023-08-17	albertstrasse	26	Cleome spinosa	morning	Wild bees	0	100	2400	0	623	45155albertstrasse	0
2023-08-17	albertstrasse	26	Cleome spinosa	morning	Hover flies	0	100	2400	0	623	45155albertstrasse	0
2023-08-17	albertstrasse	26	Cleome spinosa	morning	Other flies	0	100	2400	0	623	45155albertstrasse	0
2023-08-17	albertstrasse	26	Cleome spinosa	morning	Butterflies	0	100	2400	0	623	45155albertstrasse	0
2023-08-17	albertstrasse	26	Cleome spinosa	morning	Wasps	0	100	2400	0	623	45155albertstrasse	0
2023-08-17	albertstrasse	26	Cleome spinosa	morning	Beetles	0	100	2400	0	623	45155albertstrasse	0
2023-08-17	albertstrasse	26	Cleome spinosa	morning	True bugs	0	100	2400	0	623	45155albertstrasse	0
2023-08-17	albertstrasse	26	Cleome spinosa	morning	Ants	0	100	2400	0	623	45155albertstrasse	0
2023-08-17	albertstrasse	27	Canna indica	morning	Bumblebees	0	86.6448	2079.48	0	623	45155albertstrasse	0
2023-08-17	albertstrasse	27	Canna indica	morning	Honey bees	0	86.6448	2079.48	0	623	45155albertstrasse	0
2023-08-17	albertstrasse	27	Canna indica	morning	Wild bees	1	86.6448	2079.48	4.80891	623	45155albertstrasse	0
2023-08-17	albertstrasse	27	Canna indica	morning	Hover flies	0	86.6448	2079.48	0	623	45155albertstrasse	0
2023-08-17	albertstrasse	27	Canna indica	morning	Other flies	0	86.6448	2079.48	0	623	45155albertstrasse	0
2023-08-17	albertstrasse	27	Canna indica	morning	Butterflies	0	86.6448	2079.48	0	623	45155albertstrasse	0
2023-08-17	albertstrasse	27	Canna indica	morning	Wasps	0	86.6448	2079.48	0	623	45155albertstrasse	0
2023-08-17	albertstrasse	27	Canna indica	morning	Beetles	0	86.6448	2079.48	0	623	45155albertstrasse	0
2023-08-17	albertstrasse	27	Canna indica	morning	True bugs	0	86.6448	2079.48	0	623	45155albertstrasse	0
2023-08-17	albertstrasse	27	Canna indica	morning	Ants	0	86.6448	2079.48	0	623	45155albertstrasse	0
2023-08-17	albertstrasse	28	Tagetes patula "yellow"	morning	Bumblebees	0	61.122	1466.93	0	623	45155albertstrasse	0
2023-08-17	albertstrasse	28	Tagetes patula "yellow"	morning	Honey bees	0	61.122	1466.93	0	623	45155albertstrasse	0
2023-08-17	albertstrasse	28	Tagetes patula "yellow"	morning	Wild bees	2	61.122	1466.93	13.6339	623	45155albertstrasse	0
2023-08-17	albertstrasse	28	Tagetes patula "yellow"	morning	Hover flies	0	61.122	1466.93	0	623	45155albertstrasse	0
2023-08-17	albertstrasse	28	Tagetes patula "yellow"	morning	Other flies	0	61.122	1466.93	0	623	45155albertstrasse	0
2023-08-17	albertstrasse	28	Tagetes patula "yellow"	morning	Butterflies	0	61.122	1466.93	0	623	45155albertstrasse	0
2023-08-17	albertstrasse	28	Tagetes patula "yellow"	morning	Wasps	0	61.122	1466.93	0	623	45155albertstrasse	0
2023-08-17	albertstrasse	28	Tagetes patula "yellow"	morning	Beetles	0	61.122	1466.93	0	623	45155albertstrasse	0
2023-08-17	albertstrasse	28	Tagetes patula "yellow"	morning	True bugs	0	61.122	1466.93	0	623	45155albertstrasse	0
2023-08-17	albertstrasse	28	Tagetes patula "yellow"	morning	Ants	0	61.122	1466.93	0	623	45155albertstrasse	0
2023-08-17	albertstrasse	29	Salvia farianacea	morning	Bumblebees	0	92.466	2219.18	0	623	45155albertstrasse	0
2023-08-17	albertstrasse	29	Salvia farianacea	morning	Honey bees	0	92.466	2219.18	0	623	45155albertstrasse	0
2023-08-17	albertstrasse	29	Salvia farianacea	morning	Wild bees	0	92.466	2219.18	0	623	45155albertstrasse	0
2023-08-17	albertstrasse	29	Salvia farianacea	morning	Hover flies	0	92.466	2219.18	0	623	45155albertstrasse	0
2023-08-17	albertstrasse	29	Salvia farianacea	morning	Other flies	1	92.466	2219.18	4.50616	623	45155albertstrasse	0
2023-08-17	albertstrasse	29	Salvia farianacea	morning	Butterflies	0	92.466	2219.18	0	623	45155albertstrasse	0
2023-08-17	albertstrasse	29	Salvia farianacea	morning	Wasps	0	92.466	2219.18	0	623	45155albertstrasse	0
2023-08-17	albertstrasse	29	Salvia farianacea	morning	Beetles	0	92.466	2219.18	0	623	45155albertstrasse	0
2023-08-17	albertstrasse	29	Salvia farianacea	morning	True bugs	0	92.466	2219.18	0	623	45155albertstrasse	0
2023-08-17	albertstrasse	29	Salvia farianacea	morning	Ants	0	92.466	2219.18	0	623	45155albertstrasse	0
2023-08-17	albertstrasse	30	Begonia semperflorens "white"	morning	Bumblebees	0	83.186	1996.46	0	623	45155albertstrasse	0
2023-08-17	albertstrasse	30	Begonia semperflorens "white"	morning	Honey bees	0	83.186	1996.46	0	623	45155albertstrasse	0
2023-08-17	albertstrasse	30	Begonia semperflorens "white"	morning	Wild bees	0	83.186	1996.46	0	623	45155albertstrasse	0
2023-08-17	albertstrasse	30	Begonia semperflorens "white"	morning	Hover flies	0	83.186	1996.46	0	623	45155albertstrasse	0
2023-08-17	albertstrasse	30	Begonia semperflorens "white"	morning	Other flies	1	83.186	1996.46	5.00886	623	45155albertstrasse	0
2023-08-17	albertstrasse	30	Begonia semperflorens "white"	morning	Butterflies	0	83.186	1996.46	0	623	45155albertstrasse	0
2023-08-17	albertstrasse	30	Begonia semperflorens "white"	morning	Wasps	0	83.186	1996.46	0	623	45155albertstrasse	0
2023-08-17	albertstrasse	30	Begonia semperflorens "white"	morning	Beetles	0	83.186	1996.46	0	623	45155albertstrasse	0
2023-08-17	albertstrasse	30	Begonia semperflorens "white"	morning	True bugs	0	83.186	1996.46	0	623	45155albertstrasse	0
2023-08-17	albertstrasse	30	Begonia semperflorens "white"	morning	Ants	0	83.186	1996.46	0	623	45155albertstrasse	0
2023-08-17	albertstrasse	31	Cleome spinosa	morning	Bumblebees	0	100	2400	0	623	45155albertstrasse	0
2023-08-17	albertstrasse	31	Cleome spinosa	morning	Honey bees	0	100	2400	0	623	45155albertstrasse	0
2023-08-17	albertstrasse	31	Cleome spinosa	morning	Wild bees	0	100	2400	0	623	45155albertstrasse	0
2023-08-17	albertstrasse	31	Cleome spinosa	morning	Hover flies	0	100	2400	0	623	45155albertstrasse	0
2023-08-17	albertstrasse	31	Cleome spinosa	morning	Other flies	1	100	2400	4.16667	623	45155albertstrasse	0
2023-08-17	albertstrasse	31	Cleome spinosa	morning	Butterflies	0	100	2400	0	623	45155albertstrasse	0
2023-08-17	albertstrasse	31	Cleome spinosa	morning	Wasps	0	100	2400	0	623	45155albertstrasse	0
2023-08-17	albertstrasse	31	Cleome spinosa	morning	Beetles	0	100	2400	0	623	45155albertstrasse	0
2023-08-17	albertstrasse	31	Cleome spinosa	morning	True bugs	0	100	2400	0	623	45155albertstrasse	0
2023-08-17	albertstrasse	31	Cleome spinosa	morning	Ants	0	100	2400	0	623	45155albertstrasse	0
2023-08-17	albertstrasse	32	Salvia farianacea	morning	Bumblebees	0	80.7802	1938.72	0	623	45155albertstrasse	0
2023-08-17	albertstrasse	32	Salvia farianacea	morning	Honey bees	0	80.7802	1938.72	0	623	45155albertstrasse	0
2023-08-17	albertstrasse	32	Salvia farianacea	morning	Wild bees	0	80.7802	1938.72	0	623	45155albertstrasse	0
2023-08-17	albertstrasse	32	Salvia farianacea	morning	Hover flies	0	80.7802	1938.72	0	623	45155albertstrasse	0
2023-08-17	albertstrasse	32	Salvia farianacea	morning	Other flies	0	80.7802	1938.72	0	623	45155albertstrasse	0
2023-08-17	albertstrasse	32	Salvia farianacea	morning	Butterflies	0	80.7802	1938.72	0	623	45155albertstrasse	0
2023-08-17	albertstrasse	32	Salvia farianacea	morning	Wasps	0	80.7802	1938.72	0	623	45155albertstrasse	0
2023-08-17	albertstrasse	32	Salvia farianacea	morning	Beetles	0	80.7802	1938.72	0	623	45155albertstrasse	0
2023-08-17	albertstrasse	32	Salvia farianacea	morning	True bugs	0	80.7802	1938.72	0	623	45155albertstrasse	0
2023-08-17	albertstrasse	32	Salvia farianacea	morning	Ants	0	80.7802	1938.72	0	623	45155albertstrasse	0
2023-08-17	albertstrasse	33	Hibiscus syriacus	morning	Bumblebees	0	56.7047	1360.91	0	623	45155albertstrasse	0
2023-08-17	albertstrasse	33	Hibiscus syriacus	morning	Honey bees	0	56.7047	1360.91	0	623	45155albertstrasse	0
2023-08-17	albertstrasse	33	Hibiscus syriacus	morning	Wild bees	0	56.7047	1360.91	0	623	45155albertstrasse	0
2023-08-17	albertstrasse	33	Hibiscus syriacus	morning	Hover flies	0	56.7047	1360.91	0	623	45155albertstrasse	0
2023-08-17	albertstrasse	33	Hibiscus syriacus	morning	Other flies	0	56.7047	1360.91	0	623	45155albertstrasse	0
2023-08-17	albertstrasse	33	Hibiscus syriacus	morning	Butterflies	0	56.7047	1360.91	0	623	45155albertstrasse	0
2023-08-17	albertstrasse	33	Hibiscus syriacus	morning	Wasps	0	56.7047	1360.91	0	623	45155albertstrasse	0
2023-08-17	albertstrasse	33	Hibiscus syriacus	morning	Beetles	0	56.7047	1360.91	0	623	45155albertstrasse	0
2023-08-17	albertstrasse	33	Hibiscus syriacus	morning	True bugs	0	56.7047	1360.91	0	623	45155albertstrasse	0
2023-08-17	albertstrasse	33	Hibiscus syriacus	morning	Ants	2	56.7047	1360.91	14.696	623	45155albertstrasse	0
2023-08-17	albertstrasse	34	Tagetes patula "yellow"	morning	Bumblebees	0	15.8633	380.72	0	623	45155albertstrasse	0
2023-08-17	albertstrasse	34	Tagetes patula "yellow"	morning	Honey bees	0	15.8633	380.72	0	623	45155albertstrasse	0
2023-08-17	albertstrasse	34	Tagetes patula "yellow"	morning	Wild bees	1	15.8633	380.72	26.266	623	45155albertstrasse	0
2023-08-17	albertstrasse	34	Tagetes patula "yellow"	morning	Hover flies	0	15.8633	380.72	0	623	45155albertstrasse	0
2023-08-17	albertstrasse	34	Tagetes patula "yellow"	morning	Other flies	0	15.8633	380.72	0	623	45155albertstrasse	0
2023-08-17	albertstrasse	34	Tagetes patula "yellow"	morning	Butterflies	0	15.8633	380.72	0	623	45155albertstrasse	0
2023-08-17	albertstrasse	34	Tagetes patula "yellow"	morning	Wasps	0	15.8633	380.72	0	623	45155albertstrasse	0
2023-08-17	albertstrasse	34	Tagetes patula "yellow"	morning	Beetles	0	15.8633	380.72	0	623	45155albertstrasse	0
2023-08-17	albertstrasse	34	Tagetes patula "yellow"	morning	True bugs	0	15.8633	380.72	0	623	45155albertstrasse	0
2023-08-17	albertstrasse	34	Tagetes patula "yellow"	morning	Ants	0	15.8633	380.72	0	623	45155albertstrasse	0
2023-08-17	albertstrasse	35	Cleome spinosa	morning	Bumblebees	0	100	2400	0	623	45155albertstrasse	0
2023-08-17	albertstrasse	35	Cleome spinosa	morning	Honey bees	0	100	2400	0	623	45155albertstrasse	0
2023-08-17	albertstrasse	35	Cleome spinosa	morning	Wild bees	2	100	2400	8.33333	623	45155albertstrasse	0
2023-08-17	albertstrasse	35	Cleome spinosa	morning	Hover flies	0	100	2400	0	623	45155albertstrasse	0
2023-08-17	albertstrasse	35	Cleome spinosa	morning	Other flies	0	100	2400	0	623	45155albertstrasse	0
2023-08-17	albertstrasse	35	Cleome spinosa	morning	Butterflies	0	100	2400	0	623	45155albertstrasse	0
2023-08-17	albertstrasse	35	Cleome spinosa	morning	Wasps	0	100	2400	0	623	45155albertstrasse	0
2023-08-17	albertstrasse	35	Cleome spinosa	morning	Beetles	0	100	2400	0	623	45155albertstrasse	0
2023-08-17	albertstrasse	35	Cleome spinosa	morning	True bugs	0	100	2400	0	623	45155albertstrasse	0
2023-08-17	albertstrasse	35	Cleome spinosa	morning	Ants	0	100	2400	0	623	45155albertstrasse	0
2023-08-17	albertstrasse	36	Begonia semperflorens "white"	morning	Bumblebees	0	71.6886	1720.53	0	623	45155albertstrasse	0
2023-08-17	albertstrasse	36	Begonia semperflorens "white"	morning	Honey bees	0	71.6886	1720.53	0	623	45155albertstrasse	0
2023-08-17	albertstrasse	36	Begonia semperflorens "white"	morning	Wild bees	0	71.6886	1720.53	0	623	45155albertstrasse	0
2023-08-17	albertstrasse	36	Begonia semperflorens "white"	morning	Hover flies	0	71.6886	1720.53	0	623	45155albertstrasse	0
2023-08-17	albertstrasse	36	Begonia semperflorens "white"	morning	Other flies	0	71.6886	1720.53	0	623	45155albertstrasse	0
2023-08-17	albertstrasse	36	Begonia semperflorens "white"	morning	Butterflies	0	71.6886	1720.53	0	623	45155albertstrasse	0
2023-08-17	albertstrasse	36	Begonia semperflorens "white"	morning	Wasps	0	71.6886	1720.53	0	623	45155albertstrasse	0
2023-08-17	albertstrasse	36	Begonia semperflorens "white"	morning	Beetles	0	71.6886	1720.53	0	623	45155albertstrasse	0
2023-08-17	albertstrasse	36	Begonia semperflorens "white"	morning	True bugs	0	71.6886	1720.53	0	623	45155albertstrasse	0
2023-08-17	albertstrasse	36	Begonia semperflorens "white"	morning	Ants	0	71.6886	1720.53	0	623	45155albertstrasse	0
2023-08-17	albertstrasse	37	Salvia farianacea	morning	Bumblebees	1	60.3641	1448.74	6.90256	623	45155albertstrasse	0
2023-08-17	albertstrasse	37	Salvia farianacea	morning	Honey bees	1	60.3641	1448.74	6.90256	623	45155albertstrasse	0
2023-08-17	albertstrasse	37	Salvia farianacea	morning	Wild bees	0	60.3641	1448.74	0	623	45155albertstrasse	0
2023-08-17	albertstrasse	37	Salvia farianacea	morning	Hover flies	0	60.3641	1448.74	0	623	45155albertstrasse	0
2023-08-17	albertstrasse	37	Salvia farianacea	morning	Other flies	0	60.3641	1448.74	0	623	45155albertstrasse	0
2023-08-17	albertstrasse	37	Salvia farianacea	morning	Butterflies	1	60.3641	1448.74	6.90256	623	45155albertstrasse	0
2023-08-17	albertstrasse	37	Salvia farianacea	morning	Wasps	0	60.3641	1448.74	0	623	45155albertstrasse	0
2023-08-17	albertstrasse	37	Salvia farianacea	morning	Beetles	0	60.3641	1448.74	0	623	45155albertstrasse	0
2023-08-17	albertstrasse	37	Salvia farianacea	morning	True bugs	0	60.3641	1448.74	0	623	45155albertstrasse	0
2023-08-17	albertstrasse	37	Salvia farianacea	morning	Ants	0	60.3641	1448.74	0	623	45155albertstrasse	0
2023-08-17	kunstgalerie	1	Begonia semperflorens "white"	afternoon	Bumblebees	0	73.3166	1759.6	0	120	45155kunstgalerie	1
2023-08-17	kunstgalerie	1	Begonia semperflorens "white"	afternoon	Honey bees	0	73.3166	1759.6	0	120	45155kunstgalerie	0
2023-08-17	kunstgalerie	1	Begonia semperflorens "white"	afternoon	Wild bees	1	73.3166	1759.6	5.68311	120	45155kunstgalerie	0
2023-08-17	kunstgalerie	1	Begonia semperflorens "white"	afternoon	Hover flies	0	73.3166	1759.6	0	120	45155kunstgalerie	0
2023-08-17	kunstgalerie	1	Begonia semperflorens "white"	afternoon	Other flies	0	73.3166	1759.6	0	120	45155kunstgalerie	0
2023-08-17	kunstgalerie	1	Begonia semperflorens "white"	afternoon	Butterflies	0	73.3166	1759.6	0	120	45155kunstgalerie	0
2023-08-17	kunstgalerie	1	Begonia semperflorens "white"	afternoon	Wasps	0	73.3166	1759.6	0	120	45155kunstgalerie	0
2023-08-17	kunstgalerie	1	Begonia semperflorens "white"	afternoon	Beetles	0	73.3166	1759.6	0	120	45155kunstgalerie	0
2023-08-17	kunstgalerie	1	Begonia semperflorens "white"	afternoon	True bugs	0	73.3166	1759.6	0	120	45155kunstgalerie	0
2023-08-17	kunstgalerie	1	Begonia semperflorens "white"	afternoon	Ants	0	73.3166	1759.6	0	120	45155kunstgalerie	0
2023-08-17	kunstgalerie	2	Canna indica	afternoon	Bumblebees	0	100	2400	0	120	45155kunstgalerie	0
2023-08-17	kunstgalerie	2	Canna indica	afternoon	Honey bees	0	100	2400	0	120	45155kunstgalerie	0
2023-08-17	kunstgalerie	2	Canna indica	afternoon	Wild bees	0	100	2400	0	120	45155kunstgalerie	0
2023-08-17	kunstgalerie	2	Canna indica	afternoon	Hover flies	0	100	2400	0	120	45155kunstgalerie	0
2023-08-17	kunstgalerie	2	Canna indica	afternoon	Other flies	0	100	2400	0	120	45155kunstgalerie	0
2023-08-17	kunstgalerie	2	Canna indica	afternoon	Butterflies	0	100	2400	0	120	45155kunstgalerie	0
2023-08-17	kunstgalerie	2	Canna indica	afternoon	Wasps	0	100	2400	0	120	45155kunstgalerie	0
2023-08-17	kunstgalerie	2	Canna indica	afternoon	Beetles	0	100	2400	0	120	45155kunstgalerie	0
2023-08-17	kunstgalerie	2	Canna indica	afternoon	True bugs	0	100	2400	0	120	45155kunstgalerie	0
2023-08-17	kunstgalerie	2	Canna indica	afternoon	Ants	0	100	2400	0	120	45155kunstgalerie	0
2023-08-17	kunstgalerie	3	Cleome spinosa	afternoon	Bumblebees	0	100	2400	0	120	45155kunstgalerie	0
2023-08-17	kunstgalerie	3	Cleome spinosa	afternoon	Honey bees	0	100	2400	0	120	45155kunstgalerie	0
2023-08-17	kunstgalerie	3	Cleome spinosa	afternoon	Wild bees	1	100	2400	4.16667	120	45155kunstgalerie	0
2023-08-17	kunstgalerie	3	Cleome spinosa	afternoon	Hover flies	0	100	2400	0	120	45155kunstgalerie	0
2023-08-17	kunstgalerie	3	Cleome spinosa	afternoon	Other flies	0	100	2400	0	120	45155kunstgalerie	0
2023-08-17	kunstgalerie	3	Cleome spinosa	afternoon	Butterflies	0	100	2400	0	120	45155kunstgalerie	0
2023-08-17	kunstgalerie	3	Cleome spinosa	afternoon	Wasps	0	100	2400	0	120	45155kunstgalerie	0
2023-08-17	kunstgalerie	3	Cleome spinosa	afternoon	Beetles	0	100	2400	0	120	45155kunstgalerie	0
2023-08-17	kunstgalerie	3	Cleome spinosa	afternoon	True bugs	0	100	2400	0	120	45155kunstgalerie	0
2023-08-17	kunstgalerie	3	Cleome spinosa	afternoon	Ants	0	100	2400	0	120	45155kunstgalerie	0
2023-08-17	kunstgalerie	4	Tagetes patula "yellow"	afternoon	Bumblebees	0	36.6846	880.431	0	120	45155kunstgalerie	0
2023-08-17	kunstgalerie	4	Tagetes patula "yellow"	afternoon	Honey bees	0	36.6846	880.431	0	120	45155kunstgalerie	0
2023-08-17	kunstgalerie	4	Tagetes patula "yellow"	afternoon	Wild bees	0	36.6846	880.431	0	120	45155kunstgalerie	0
2023-08-17	kunstgalerie	4	Tagetes patula "yellow"	afternoon	Hover flies	0	36.6846	880.431	0	120	45155kunstgalerie	0
2023-08-17	kunstgalerie	4	Tagetes patula "yellow"	afternoon	Other flies	0	36.6846	880.431	0	120	45155kunstgalerie	0
2023-08-17	kunstgalerie	4	Tagetes patula "yellow"	afternoon	Butterflies	0	36.6846	880.431	0	120	45155kunstgalerie	0
2023-08-17	kunstgalerie	4	Tagetes patula "yellow"	afternoon	Wasps	0	36.6846	880.431	0	120	45155kunstgalerie	0
2023-08-17	kunstgalerie	4	Tagetes patula "yellow"	afternoon	Beetles	0	36.6846	880.431	0	120	45155kunstgalerie	0
2023-08-17	kunstgalerie	4	Tagetes patula "yellow"	afternoon	True bugs	0	36.6846	880.431	0	120	45155kunstgalerie	0
2023-08-17	kunstgalerie	4	Tagetes patula "yellow"	afternoon	Ants	1	36.6846	880.431	11.3581	120	45155kunstgalerie	0
2023-08-17	kunstgalerie	5	Tagetes patula "orange"	afternoon	Bumblebees	0	38.1128	914.707	0	120	45155kunstgalerie	0
2023-08-17	kunstgalerie	5	Tagetes patula "orange"	afternoon	Honey bees	0	38.1128	914.707	0	120	45155kunstgalerie	0
2023-08-17	kunstgalerie	5	Tagetes patula "orange"	afternoon	Wild bees	1	38.1128	914.707	10.9325	120	45155kunstgalerie	0
2023-08-17	kunstgalerie	5	Tagetes patula "orange"	afternoon	Hover flies	0	38.1128	914.707	0	120	45155kunstgalerie	0
2023-08-17	kunstgalerie	5	Tagetes patula "orange"	afternoon	Other flies	1	38.1128	914.707	10.9325	120	45155kunstgalerie	0
2023-08-17	kunstgalerie	5	Tagetes patula "orange"	afternoon	Butterflies	0	38.1128	914.707	0	120	45155kunstgalerie	0
2023-08-17	kunstgalerie	5	Tagetes patula "orange"	afternoon	Wasps	0	38.1128	914.707	0	120	45155kunstgalerie	0
2023-08-17	kunstgalerie	5	Tagetes patula "orange"	afternoon	Beetles	0	38.1128	914.707	0	120	45155kunstgalerie	0
2023-08-17	kunstgalerie	5	Tagetes patula "orange"	afternoon	True bugs	0	38.1128	914.707	0	120	45155kunstgalerie	0
2023-08-17	kunstgalerie	5	Tagetes patula "orange"	afternoon	Ants	0	38.1128	914.707	0	120	45155kunstgalerie	0
2023-08-17	kunstgalerie	6	Salvia farianacea	afternoon	Bumblebees	0	85.6621	2055.89	0	120	45155kunstgalerie	0
2023-08-17	kunstgalerie	6	Salvia farianacea	afternoon	Honey bees	0	85.6621	2055.89	0	120	45155kunstgalerie	0
2023-08-17	kunstgalerie	6	Salvia farianacea	afternoon	Wild bees	0	85.6621	2055.89	0	120	45155kunstgalerie	0
2023-08-17	kunstgalerie	6	Salvia farianacea	afternoon	Hover flies	0	85.6621	2055.89	0	120	45155kunstgalerie	0
2023-08-17	kunstgalerie	6	Salvia farianacea	afternoon	Other flies	0	85.6621	2055.89	0	120	45155kunstgalerie	0
2023-08-17	kunstgalerie	6	Salvia farianacea	afternoon	Butterflies	0	85.6621	2055.89	0	120	45155kunstgalerie	0
2023-08-17	kunstgalerie	6	Salvia farianacea	afternoon	Wasps	0	85.6621	2055.89	0	120	45155kunstgalerie	0
2023-08-17	kunstgalerie	6	Salvia farianacea	afternoon	Beetles	0	85.6621	2055.89	0	120	45155kunstgalerie	0
2023-08-17	kunstgalerie	6	Salvia farianacea	afternoon	True bugs	0	85.6621	2055.89	0	120	45155kunstgalerie	0
2023-08-17	kunstgalerie	6	Salvia farianacea	afternoon	Ants	0	85.6621	2055.89	0	120	45155kunstgalerie	0
2023-08-17	kunstgalerie	7	Salvia splendens "Red"	afternoon	Bumblebees	0	51.8102	1243.44	0	120	45155kunstgalerie	0
2023-08-17	kunstgalerie	7	Salvia splendens "Red"	afternoon	Honey bees	0	51.8102	1243.44	0	120	45155kunstgalerie	0
2023-08-17	kunstgalerie	7	Salvia splendens "Red"	afternoon	Wild bees	0	51.8102	1243.44	0	120	45155kunstgalerie	0
2023-08-17	kunstgalerie	7	Salvia splendens "Red"	afternoon	Hover flies	0	51.8102	1243.44	0	120	45155kunstgalerie	0
2023-08-17	kunstgalerie	7	Salvia splendens "Red"	afternoon	Other flies	1	51.8102	1243.44	8.04217	120	45155kunstgalerie	0
2023-08-17	kunstgalerie	7	Salvia splendens "Red"	afternoon	Butterflies	0	51.8102	1243.44	0	120	45155kunstgalerie	0
2023-08-17	kunstgalerie	7	Salvia splendens "Red"	afternoon	Wasps	0	51.8102	1243.44	0	120	45155kunstgalerie	0
2023-08-17	kunstgalerie	7	Salvia splendens "Red"	afternoon	Beetles	0	51.8102	1243.44	0	120	45155kunstgalerie	0
2023-08-17	kunstgalerie	7	Salvia splendens "Red"	afternoon	True bugs	0	51.8102	1243.44	0	120	45155kunstgalerie	0
2023-08-17	kunstgalerie	7	Salvia splendens "Red"	afternoon	Ants	0	51.8102	1243.44	0	120	45155kunstgalerie	0
2023-08-17	stadtpark	8	Echinacea purpurea "Alba"	afternoon	Bumblebees	0	74.995	1799.88	0	1288
2023-08-17	stadtpark	8	Echinacea purpurea "Alba"	afternoon	Honey bees	3	74.995	1799.88	16.6678	1288	45155stadtpark	1
2023-08-17	stadtpark	8	Echinacea purpurea "Alba"	afternoon	Wild bees	1	74.995	1799.88	5.55593	1288	45155stadtpark	0
2023-08-17	stadtpark	8	Echinacea purpurea "Alba"	afternoon	Hover flies	0	74.995	1799.88	0	1288	45155stadtpark	0
2023-08-17	stadtpark	8	Echinacea purpurea "Alba"	afternoon	Other flies	0	74.995	1799.88	0	1288	45155stadtpark	0
2023-08-17	stadtpark	8	Echinacea purpurea "Alba"	afternoon	Butterflies	0	74.995	1799.88	0	1288	45155stadtpark	0
2023-08-17	stadtpark	8	Echinacea purpurea "Alba"	afternoon	Wasps	0	74.995	1799.88	0	1288	45155stadtpark	0
2023-08-17	stadtpark	8	Echinacea purpurea "Alba"	afternoon	Beetles	0	74.995	1799.88	0	1288	45155stadtpark	0
2023-08-17	stadtpark	8	Echinacea purpurea "Alba"	afternoon	True bugs	0	74.995	1799.88	0	1288	45155stadtpark	0
2023-08-17	stadtpark	8	Echinacea purpurea "Alba"	afternoon	Ants	0	74.995	1799.88	0	1288	45155stadtpark	0
2023-08-17	stadtpark	9	Nepeta grandiflora	afternoon	Bumblebees	0	100	2400	0	1288	45155stadtpark	0
2023-08-17	stadtpark	9	Nepeta grandiflora	afternoon	Honey bees	5	100	2400	20.8333	1288	45155stadtpark	0
2023-08-17	stadtpark	9	Nepeta grandiflora	afternoon	Wild bees	0	100	2400	0	1288	45155stadtpark	0
2023-08-17	stadtpark	9	Nepeta grandiflora	afternoon	Hover flies	0	100	2400	0	1288	45155stadtpark	0
2023-08-17	stadtpark	9	Nepeta grandiflora	afternoon	Other flies	1	100	2400	4.16667	1288	45155stadtpark	0
2023-08-17	stadtpark	9	Nepeta grandiflora	afternoon	Butterflies	0	100	2400	0	1288	45155stadtpark	0
2023-08-17	stadtpark	9	Nepeta grandiflora	afternoon	Wasps	0	100	2400	0	1288	45155stadtpark	0
2023-08-17	stadtpark	9	Nepeta grandiflora	afternoon	Beetles	0	100	2400	0	1288	45155stadtpark	0
2023-08-17	stadtpark	9	Nepeta grandiflora	afternoon	True bugs	0	100	2400	0	1288	45155stadtpark	0
2023-08-17	stadtpark	9	Nepeta grandiflora	afternoon	Ants	0	100	2400	0	1288	45155stadtpark	0
2023-08-17	stadtpark	10	Rudbeckia fulgida	afternoon	Bumblebees	0	71.5645	1717.55	0	1288	45155stadtpark	0
2023-08-17	stadtpark	10	Rudbeckia fulgida	afternoon	Honey bees	0	71.5645	1717.55	0	1288	45155stadtpark	0
2023-08-17	stadtpark	10	Rudbeckia fulgida	afternoon	Wild bees	5	71.5645	1717.55	29.1113	1288	45155stadtpark	0
2023-08-17	stadtpark	10	Rudbeckia fulgida	afternoon	Hover flies	0	71.5645	1717.55	0	1288	45155stadtpark	0
2023-08-17	stadtpark	10	Rudbeckia fulgida	afternoon	Other flies	0	71.5645	1717.55	0	1288	45155stadtpark	0
2023-08-17	stadtpark	10	Rudbeckia fulgida	afternoon	Butterflies	0	71.5645	1717.55	0	1288	45155stadtpark	0
2023-08-17	stadtpark	10	Rudbeckia fulgida	afternoon	Wasps	0	71.5645	1717.55	0	1288	45155stadtpark	0
2023-08-17	stadtpark	10	Rudbeckia fulgida	afternoon	Beetles	0	71.5645	1717.55	0	1288	45155stadtpark	0
2023-08-17	stadtpark	10	Rudbeckia fulgida	afternoon	True bugs	0	71.5645	1717.55	0	1288	45155stadtpark	0
2023-08-17	stadtpark	10	Rudbeckia fulgida	afternoon	Ants	0	71.5645	1717.55	0	1288	45155stadtpark	0
2023-08-17	stadtpark	11	Geranium x magnificum	afternoon	Bumblebees	0	53.1554	1275.73	0	1288	45155stadtpark	0
2023-08-17	stadtpark	11	Geranium x magnificum	afternoon	Honey bees	1	53.1554	1275.73	7.83866	1288	45155stadtpark	0
2023-08-17	stadtpark	11	Geranium x magnificum	afternoon	Wild bees	2	53.1554	1275.73	15.6773	1288	45155stadtpark	0
2023-08-17	stadtpark	11	Geranium x magnificum	afternoon	Hover flies	0	53.1554	1275.73	0	1288	45155stadtpark	0
2023-08-17	stadtpark	11	Geranium x magnificum	afternoon	Other flies	1	53.1554	1275.73	7.83866	1288	45155stadtpark	0
2023-08-17	stadtpark	11	Geranium x magnificum	afternoon	Butterflies	0	53.1554	1275.73	0	1288	45155stadtpark	0
2023-08-17	stadtpark	11	Geranium x magnificum	afternoon	Wasps	0	53.1554	1275.73	0	1288	45155stadtpark	0
2023-08-17	stadtpark	11	Geranium x magnificum	afternoon	Beetles	0	53.1554	1275.73	0	1288	45155stadtpark	0
2023-08-17	stadtpark	11	Geranium x magnificum	afternoon	True bugs	0	53.1554	1275.73	0	1288	45155stadtpark	0
2023-08-17	stadtpark	11	Geranium x magnificum	afternoon	Ants	0	53.1554	1275.73	0	1288	45155stadtpark	0
2023-08-17	stadtpark	12	Nepeta grandiflora	afternoon	Bumblebees	0	100	2400	0	1288	45155stadtpark	0
2023-08-17	stadtpark	12	Nepeta grandiflora	afternoon	Honey bees	2	100	2400	8.33333	1288	45155stadtpark	0
2023-08-17	stadtpark	12	Nepeta grandiflora	afternoon	Wild bees	2	100	2400	8.33333	1288	45155stadtpark	0
2023-08-17	stadtpark	12	Nepeta grandiflora	afternoon	Hover flies	0	100	2400	0	1288	45155stadtpark	0
2023-08-17	stadtpark	12	Nepeta grandiflora	afternoon	Other flies	0	100	2400	0	1288	45155stadtpark	0
2023-08-17	stadtpark	12	Nepeta grandiflora	afternoon	Butterflies	0	100	2400	0	1288	45155stadtpark	0
2023-08-17	stadtpark	12	Nepeta grandiflora	afternoon	Wasps	0	100	2400	0	1288	45155stadtpark	0
2023-08-17	stadtpark	12	Nepeta grandiflora	afternoon	Beetles	0	100	2400	0	1288	45155stadtpark	0
2023-08-17	stadtpark	12	Nepeta grandiflora	afternoon	True bugs	0	100	2400	0	1288	45155stadtpark	0
2023-08-17	stadtpark	12	Nepeta grandiflora	afternoon	Ants	0	100	2400	0	1288	45155stadtpark	0
2023-08-17	stadtpark	13	Bistorta affinis	afternoon	Bumblebees	0	100	2400	0	1288	45155stadtpark	0
2023-08-17	stadtpark	13	Bistorta affinis	afternoon	Honey bees	0	100	2400	0	1288	45155stadtpark	0
2023-08-17	stadtpark	13	Bistorta affinis	afternoon	Wild bees	0	100	2400	0	1288	45155stadtpark	0
2023-08-17	stadtpark	13	Bistorta affinis	afternoon	Hover flies	0	100	2400	0	1288	45155stadtpark	0
2023-08-17	stadtpark	13	Bistorta affinis	afternoon	Other flies	0	100	2400	0	1288	45155stadtpark	0
2023-08-17	stadtpark	13	Bistorta affinis	afternoon	Butterflies	0	100	2400	0	1288	45155stadtpark	0
2023-08-17	stadtpark	13	Bistorta affinis	afternoon	Wasps	0	100	2400	0	1288	45155stadtpark	0
2023-08-17	stadtpark	13	Bistorta affinis	afternoon	Beetles	0	100	2400	0	1288	45155stadtpark	0
2023-08-17	stadtpark	13	Bistorta affinis	afternoon	True bugs	0	100	2400	0	1288	45155stadtpark	0
2023-08-17	stadtpark	13	Bistorta affinis	afternoon	Ants	0	100	2400	0	1288	45155stadtpark	0
2023-08-17	stadtpark	14	Rudbeckia fulgida	afternoon	Bumblebees	0	71.1619	1707.89	0	1288	45155stadtpark	0
2023-08-17	stadtpark	14	Rudbeckia fulgida	afternoon	Honey bees	2	71.1619	1707.89	11.7104	1288	45155stadtpark	0
2023-08-17	stadtpark	14	Rudbeckia fulgida	afternoon	Wild bees	1	71.1619	1707.89	5.85519	1288	45155stadtpark	0
2023-08-17	stadtpark	14	Rudbeckia fulgida	afternoon	Hover flies	0	71.1619	1707.89	0	1288	45155stadtpark	0
2023-08-17	stadtpark	14	Rudbeckia fulgida	afternoon	Other flies	0	71.1619	1707.89	0	1288	45155stadtpark	0
2023-08-17	stadtpark	14	Rudbeckia fulgida	afternoon	Butterflies	0	71.1619	1707.89	0	1288	45155stadtpark	0
2023-08-17	stadtpark	14	Rudbeckia fulgida	afternoon	Wasps	0	71.1619	1707.89	0	1288	45155stadtpark	0
2023-08-17	stadtpark	14	Rudbeckia fulgida	afternoon	Beetles	0	71.1619	1707.89	0	1288	45155stadtpark	0
2023-08-17	stadtpark	14	Rudbeckia fulgida	afternoon	True bugs	1	71.1619	1707.89	5.85519	1288	45155stadtpark	0
2023-08-17	stadtpark	14	Rudbeckia fulgida	afternoon	Ants	0	71.1619	1707.89	0	1288	45155stadtpark	0
2023-08-17	stadtpark	15	Geranium x magnificum	afternoon	Bumblebees	0	82.1529	1971.67	0	1288	45155stadtpark	0
2023-08-17	stadtpark	15	Geranium x magnificum	afternoon	Honey bees	0	82.1529	1971.67	0	1288	45155stadtpark	0
2023-08-17	stadtpark	15	Geranium x magnificum	afternoon	Wild bees	1	82.1529	1971.67	5.07184	1288	45155stadtpark	0
2023-08-17	stadtpark	15	Geranium x magnificum	afternoon	Hover flies	0	82.1529	1971.67	0	1288	45155stadtpark	0
2023-08-17	stadtpark	15	Geranium x magnificum	afternoon	Other flies	0	82.1529	1971.67	0	1288	45155stadtpark	0
2023-08-17	stadtpark	15	Geranium x magnificum	afternoon	Butterflies	0	82.1529	1971.67	0	1288	45155stadtpark	0
2023-08-17	stadtpark	15	Geranium x magnificum	afternoon	Wasps	0	82.1529	1971.67	0	1288	45155stadtpark	0
2023-08-17	stadtpark	15	Geranium x magnificum	afternoon	Beetles	0	82.1529	1971.67	0	1288	45155stadtpark	0
2023-08-17	stadtpark	15	Geranium x magnificum	afternoon	True bugs	0	82.1529	1971.67	0	1288	45155stadtpark	0
2023-08-17	stadtpark	15	Geranium x magnificum	afternoon	Ants	0	82.1529	1971.67	0	1288	45155stadtpark	0
2023-08-17	stadtpark	16	Salvia farianacea	afternoon	Bumblebees	0	100	2400	0	1288	45155stadtpark	0
2023-08-17	stadtpark	16	Salvia farianacea	afternoon	Honey bees	0	100	2400	0	1288	45155stadtpark	0
2023-08-17	stadtpark	16	Salvia farianacea	afternoon	Wild bees	0	100	2400	0	1288	45155stadtpark	0
2023-08-17	stadtpark	16	Salvia farianacea	afternoon	Hover flies	0	100	2400	0	1288	45155stadtpark	0
2023-08-17	stadtpark	16	Salvia farianacea	afternoon	Other flies	0	100	2400	0	1288	45155stadtpark	0
2023-08-17	stadtpark	16	Salvia farianacea	afternoon	Butterflies	0	100	2400	0	1288	45155stadtpark	0
2023-08-17	stadtpark	16	Salvia farianacea	afternoon	Wasps	0	100	2400	0	1288	45155stadtpark	0
2023-08-17	stadtpark	16	Salvia farianacea	afternoon	Beetles	0	100	2400	0	1288	45155stadtpark	0
2023-08-17	stadtpark	16	Salvia farianacea	afternoon	True bugs	0	100	2400	0	1288	45155stadtpark	0
2023-08-17	stadtpark	16	Salvia farianacea	afternoon	Ants	0	100	2400	0	1288	45155stadtpark	0
2023-08-17	stadtpark	17	Cleome spinosa	afternoon	Bumblebees	0	100	2400	0	1288	45155stadtpark	0
2023-08-17	stadtpark	17	Cleome spinosa	afternoon	Honey bees	1	100	2400	4.16667	1288	45155stadtpark	0
2023-08-17	stadtpark	17	Cleome spinosa	afternoon	Wild bees	0	100	2400	0	1288	45155stadtpark	0
2023-08-17	stadtpark	17	Cleome spinosa	afternoon	Hover flies	0	100	2400	0	1288	45155stadtpark	0
2023-08-17	stadtpark	17	Cleome spinosa	afternoon	Other flies	0	100	2400	0	1288	45155stadtpark	0
2023-08-17	stadtpark	17	Cleome spinosa	afternoon	Butterflies	0	100	2400	0	1288	45155stadtpark	0
2023-08-17	stadtpark	17	Cleome spinosa	afternoon	Wasps	1	100	2400	4.16667	1288	45155stadtpark	0
2023-08-17	stadtpark	17	Cleome spinosa	afternoon	Beetles	0	100	2400	0	1288	45155stadtpark	0
2023-08-17	stadtpark	17	Cleome spinosa	afternoon	True bugs	0	100	2400	0	1288	45155stadtpark	0
2023-08-17	stadtpark	17	Cleome spinosa	afternoon	Ants	0	100	2400	0	1288	45155stadtpark	0
2023-08-17	stadtpark	18	Canna indica	afternoon	Bumblebees	0	96.961	2327.06	0	1288	45155stadtpark	0
2023-08-17	stadtpark	18	Canna indica	afternoon	Honey bees	0	96.961	2327.06	0	1288	45155stadtpark	0
2023-08-17	stadtpark	18	Canna indica	afternoon	Wild bees	1	96.961	2327.06	4.29726	1288	45155stadtpark	0
2023-08-17	stadtpark	18	Canna indica	afternoon	Hover flies	0	96.961	2327.06	0	1288	45155stadtpark	0
2023-08-17	stadtpark	18	Canna indica	afternoon	Other flies	0	96.961	2327.06	0	1288	45155stadtpark	0
2023-08-17	stadtpark	18	Canna indica	afternoon	Butterflies	0	96.961	2327.06	0	1288	45155stadtpark	0
2023-08-17	stadtpark	18	Canna indica	afternoon	Wasps	0	96.961	2327.06	0	1288	45155stadtpark	0
2023-08-17	stadtpark	18	Canna indica	afternoon	Beetles	0	96.961	2327.06	0	1288	45155stadtpark	0
2023-08-17	stadtpark	18	Canna indica	afternoon	True bugs	0	96.961	2327.06	0	1288	45155stadtpark	0
2023-08-17	stadtpark	18	Canna indica	afternoon	Ants	0	96.961	2327.06	0	1288	45155stadtpark	0
2023-08-17	stadtpark	19	Begonia semperflorens "white"	afternoon	Bumblebees	0	51.8804	1245.13	0	1288	45155stadtpark	0
2023-08-17	stadtpark	19	Begonia semperflorens "white"	afternoon	Honey bees	0	51.8804	1245.13	0	1288	45155stadtpark	0
2023-08-17	stadtpark	19	Begonia semperflorens "white"	afternoon	Wild bees	0	51.8804	1245.13	0	1288	45155stadtpark	0
2023-08-17	stadtpark	19	Begonia semperflorens "white"	afternoon	Hover flies	0	51.8804	1245.13	0	1288	45155stadtpark	0
2023-08-17	stadtpark	19	Begonia semperflorens "white"	afternoon	Other flies	0	51.8804	1245.13	0	1288	45155stadtpark	0
2023-08-17	stadtpark	19	Begonia semperflorens "white"	afternoon	Butterflies	0	51.8804	1245.13	0	1288	45155stadtpark	0
2023-08-17	stadtpark	19	Begonia semperflorens "white"	afternoon	Wasps	0	51.8804	1245.13	0	1288	45155stadtpark	0
2023-08-17	stadtpark	19	Begonia semperflorens "white"	afternoon	Beetles	0	51.8804	1245.13	0	1288	45155stadtpark	0
2023-08-17	stadtpark	19	Begonia semperflorens "white"	afternoon	True bugs	0	51.8804	1245.13	0	1288	45155stadtpark	0
2023-08-17	stadtpark	19	Begonia semperflorens "white"	afternoon	Ants	0	51.8804	1245.13	0	1288	45155stadtpark	0
2023-08-17	stadtpark	20	Anemone japonica	afternoon	Bumblebees	0	76.1196	1826.87	0	1288	45155stadtpark	0
2023-08-17	stadtpark	20	Anemone japonica	afternoon	Honey bees	0	76.1196	1826.87	0	1288	45155stadtpark	0
2023-08-17	stadtpark	20	Anemone japonica	afternoon	Wild bees	0	76.1196	1826.87	0	1288	45155stadtpark	0
2023-08-17	stadtpark	20	Anemone japonica	afternoon	Hover flies	0	76.1196	1826.87	0	1288	45155stadtpark	0
2023-08-17	stadtpark	20	Anemone japonica	afternoon	Other flies	0	76.1196	1826.87	0	1288	45155stadtpark	0
2023-08-17	stadtpark	20	Anemone japonica	afternoon	Butterflies	0	76.1196	1826.87	0	1288	45155stadtpark	0
2023-08-17	stadtpark	20	Anemone japonica	afternoon	Wasps	0	76.1196	1826.87	0	1288	45155stadtpark	0
2023-08-17	stadtpark	20	Anemone japonica	afternoon	Beetles	0	76.1196	1826.87	0	1288	45155stadtpark	0
2023-08-17	stadtpark	20	Anemone japonica	afternoon	True bugs	0	76.1196	1826.87	0	1288	45155stadtpark	0
2023-08-17	stadtpark	20	Anemone japonica	afternoon	Ants	0	76.1196	1826.87	0	1288	45155stadtpark	0
2023-08-17	stadtpark	21	Salvia yangii	afternoon	Bumblebees	0	43.8173	1051.62	0	1288	45155stadtpark	0
2023-08-17	stadtpark	21	Salvia yangii	afternoon	Honey bees	2	43.8173	1051.62	19.0183	1288	45155stadtpark	0
2023-08-17	stadtpark	21	Salvia yangii	afternoon	Wild bees	0	43.8173	1051.62	0	1288	45155stadtpark	0
2023-08-17	stadtpark	21	Salvia yangii	afternoon	Hover flies	0	43.8173	1051.62	0	1288	45155stadtpark	0
2023-08-17	stadtpark	21	Salvia yangii	afternoon	Other flies	0	43.8173	1051.62	0	1288	45155stadtpark	0
2023-08-17	stadtpark	21	Salvia yangii	afternoon	Butterflies	0	43.8173	1051.62	0	1288	45155stadtpark	0
2023-08-17	stadtpark	21	Salvia yangii	afternoon	Wasps	0	43.8173	1051.62	0	1288	45155stadtpark	0
2023-08-17	stadtpark	21	Salvia yangii	afternoon	Beetles	0	43.8173	1051.62	0	1288	45155stadtpark	0
2023-08-17	stadtpark	21	Salvia yangii	afternoon	True bugs	0	43.8173	1051.62	0	1288	45155stadtpark	0
2023-08-17	stadtpark	21	Salvia yangii	afternoon	Ants	0	43.8173	1051.62	0	1288	45155stadtpark	0
2023-08-17	stadtpark	22	Geranium x magnificum	afternoon	Bumblebees	0	72.7812	1746.75	0	1288	45155stadtpark	0
2023-08-17	stadtpark	22	Geranium x magnificum	afternoon	Honey bees	0	72.7812	1746.75	0	1288	45155stadtpark	0
2023-08-17	stadtpark	22	Geranium x magnificum	afternoon	Wild bees	4	72.7812	1746.75	22.8997	1288	45155stadtpark	0
2023-08-17	stadtpark	22	Geranium x magnificum	afternoon	Hover flies	0	72.7812	1746.75	0	1288	45155stadtpark	0
2023-08-17	stadtpark	22	Geranium x magnificum	afternoon	Other flies	0	72.7812	1746.75	0	1288	45155stadtpark	0
2023-08-17	stadtpark	22	Geranium x magnificum	afternoon	Butterflies	0	72.7812	1746.75	0	1288	45155stadtpark	0
2023-08-17	stadtpark	22	Geranium x magnificum	afternoon	Wasps	1	72.7812	1746.75	5.72492	1288	45155stadtpark	0
2023-08-17	stadtpark	22	Geranium x magnificum	afternoon	Beetles	0	72.7812	1746.75	0	1288	45155stadtpark	0
2023-08-17	stadtpark	22	Geranium x magnificum	afternoon	True bugs	0	72.7812	1746.75	0	1288	45155stadtpark	0
2023-08-17	stadtpark	22	Geranium x magnificum	afternoon	Ants	0	72.7812	1746.75	0	1288	45155stadtpark	0
2023-08-17	stadtpark	23	Rudbeckia fulgida	afternoon	Bumblebees	0	100	2400	0	1288	45155stadtpark	0
2023-08-17	stadtpark	23	Rudbeckia fulgida	afternoon	Honey bees	1	100	2400	4.16667	1288	45155stadtpark	0
2023-08-17	stadtpark	23	Rudbeckia fulgida	afternoon	Wild bees	3	100	2400	12.5	1288	45155stadtpark	0
2023-08-17	stadtpark	23	Rudbeckia fulgida	afternoon	Hover flies	0	100	2400	0	1288	45155stadtpark	0
2023-08-17	stadtpark	23	Rudbeckia fulgida	afternoon	Other flies	0	100	2400	0	1288	45155stadtpark	0
2023-08-17	stadtpark	23	Rudbeckia fulgida	afternoon	Butterflies	0	100	2400	0	1288	45155stadtpark	0
2023-08-17	stadtpark	23	Rudbeckia fulgida	afternoon	Wasps	0	100	2400	0	1288	45155stadtpark	0
2023-08-17	stadtpark	23	Rudbeckia fulgida	afternoon	Beetles	0	100	2400	0	1288	45155stadtpark	0
2023-08-17	stadtpark	23	Rudbeckia fulgida	afternoon	True bugs	0	100	2400	0	1288	45155stadtpark	0
2023-08-17	stadtpark	23	Rudbeckia fulgida	afternoon	Ants	0	100	2400	0	1288	45155stadtpark	0
2023-08-17	stadtpark	24	Eryngium planum "Flachblatt-Mannstreu"	afternoon	Bumblebees	0	46.9996	1127.99	0	1288	45155stadtpark	0
2023-08-17	stadtpark	24	Eryngium planum "Flachblatt-Mannstreu"	afternoon	Honey bees	0	46.9996	1127.99	0	1288	45155stadtpark	0
2023-08-17	stadtpark	24	Eryngium planum "Flachblatt-Mannstreu"	afternoon	Wild bees	0	46.9996	1127.99	0	1288	45155stadtpark	0
2023-08-17	stadtpark	24	Eryngium planum "Flachblatt-Mannstreu"	afternoon	Hover flies	0	46.9996	1127.99	0	1288	45155stadtpark	0
2023-08-17	stadtpark	24	Eryngium planum "Flachblatt-Mannstreu"	afternoon	Other flies	0	46.9996	1127.99	0	1288	45155stadtpark	0
2023-08-17	stadtpark	24	Eryngium planum "Flachblatt-Mannstreu"	afternoon	Butterflies	0	46.9996	1127.99	0	1288	45155stadtpark	0
2023-08-17	stadtpark	24	Eryngium planum "Flachblatt-Mannstreu"	afternoon	Wasps	0	46.9996	1127.99	0	1288	45155stadtpark	0
2023-08-17	stadtpark	24	Eryngium planum "Flachblatt-Mannstreu"	afternoon	Beetles	0	46.9996	1127.99	0	1288	45155stadtpark	0
2023-08-17	stadtpark	24	Eryngium planum "Flachblatt-Mannstreu"	afternoon	True bugs	0	46.9996	1127.99	0	1288	45155stadtpark	0
2023-08-17	stadtpark	24	Eryngium planum "Flachblatt-Mannstreu"	afternoon	Ants	0	46.9996	1127.99	0	1288	45155stadtpark	0
2023-08-17	stadtpark	25	Echinacea purpurea "Alba"	afternoon	Bumblebees	0	94.0442	2257.06	0	1288	45155stadtpark	0
2023-08-17	stadtpark	25	Echinacea purpurea "Alba"	afternoon	Honey bees	4	94.0442	2257.06	17.7222	1288	45155stadtpark	0
2023-08-17	stadtpark	25	Echinacea purpurea "Alba"	afternoon	Wild bees	0	94.0442	2257.06	0	1288	45155stadtpark	0
2023-08-17	stadtpark	25	Echinacea purpurea "Alba"	afternoon	Hover flies	0	94.0442	2257.06	0	1288	45155stadtpark	0
2023-08-17	stadtpark	25	Echinacea purpurea "Alba"	afternoon	Other flies	0	94.0442	2257.06	0	1288	45155stadtpark	0
2023-08-17	stadtpark	25	Echinacea purpurea "Alba"	afternoon	Butterflies	1	94.0442	2257.06	4.43054	1288	45155stadtpark	0
2023-08-17	stadtpark	25	Echinacea purpurea "Alba"	afternoon	Wasps	0	94.0442	2257.06	0	1288	45155stadtpark	0
2023-08-17	stadtpark	25	Echinacea purpurea "Alba"	afternoon	Beetles	0	94.0442	2257.06	0	1288	45155stadtpark	0
2023-08-17	stadtpark	25	Echinacea purpurea "Alba"	afternoon	True bugs	0	94.0442	2257.06	0	1288	45155stadtpark	0
2023-08-17	stadtpark	25	Echinacea purpurea "Alba"	afternoon	Ants	0	94.0442	2257.06	0	1288	45155stadtpark	0
2023-08-17	stadtpark	26	Geranium x magnificum	afternoon	Bumblebees	0	63.1054	1514.53	0	1288	45155stadtpark	0
2023-08-17	stadtpark	26	Geranium x magnificum	afternoon	Honey bees	3	63.1054	1514.53	19.8081	1288	45155stadtpark	0
2023-08-17	stadtpark	26	Geranium x magnificum	afternoon	Wild bees	4	63.1054	1514.53	26.4108	1288	45155stadtpark	0
2023-08-17	stadtpark	26	Geranium x magnificum	afternoon	Hover flies	0	63.1054	1514.53	0	1288	45155stadtpark	0
2023-08-17	stadtpark	26	Geranium x magnificum	afternoon	Other flies	0	63.1054	1514.53	0	1288	45155stadtpark	0
2023-08-17	stadtpark	26	Geranium x magnificum	afternoon	Butterflies	0	63.1054	1514.53	0	1288	45155stadtpark	0
2023-08-17	stadtpark	26	Geranium x magnificum	afternoon	Wasps	0	63.1054	1514.53	0	1288	45155stadtpark	0
2023-08-17	stadtpark	26	Geranium x magnificum	afternoon	Beetles	0	63.1054	1514.53	0	1288	45155stadtpark	0
2023-08-17	stadtpark	26	Geranium x magnificum	afternoon	True bugs	0	63.1054	1514.53	0	1288	45155stadtpark	0
2023-08-17	stadtpark	26	Geranium x magnificum	afternoon	Ants	0	63.1054	1514.53	0	1288	45155stadtpark	0
2023-08-17	bismarckplatz	27	Anemone japonica	afternoon	Bumblebees	0	69.2706	1662.49	0	183	45155bismarckplatz	1
2023-08-17	bismarckplatz	27	Anemone japonica	afternoon	Honey bees	0	69.2706	1662.49	0	183	45155bismarckplatz	0
2023-08-17	bismarckplatz	27	Anemone japonica	afternoon	Wild bees	1	69.2706	1662.49	6.01506	183	45155bismarckplatz	0
2023-08-17	bismarckplatz	27	Anemone japonica	afternoon	Hover flies	0	69.2706	1662.49	0	183	45155bismarckplatz	0
2023-08-17	bismarckplatz	27	Anemone japonica	afternoon	Other flies	3	69.2706	1662.49	18.0452	183	45155bismarckplatz	0
2023-08-17	bismarckplatz	27	Anemone japonica	afternoon	Butterflies	0	69.2706	1662.49	0	183	45155bismarckplatz	0
2023-08-17	bismarckplatz	27	Anemone japonica	afternoon	Wasps	0	69.2706	1662.49	0	183	45155bismarckplatz	0
2023-08-17	bismarckplatz	27	Anemone japonica	afternoon	Beetles	0	69.2706	1662.49	0	183	45155bismarckplatz	0
2023-08-17	bismarckplatz	27	Anemone japonica	afternoon	True bugs	0	69.2706	1662.49	0	183	45155bismarckplatz	0
2023-08-17	bismarckplatz	27	Anemone japonica	afternoon	Ants	0	69.2706	1662.49	0	183	45155bismarckplatz	0
2023-08-17	bismarckplatz	28	Geranium x magnificum	afternoon	Bumblebees	0	100	2400	0	183	45155bismarckplatz	0
2023-08-17	bismarckplatz	28	Geranium x magnificum	afternoon	Honey bees	5	100	2400	20.8333	183	45155bismarckplatz	0
2023-08-17	bismarckplatz	28	Geranium x magnificum	afternoon	Wild bees	5	100	2400	20.8333	183	45155bismarckplatz	0
2023-08-17	bismarckplatz	28	Geranium x magnificum	afternoon	Hover flies	0	100	2400	0	183	45155bismarckplatz	0
2023-08-17	bismarckplatz	28	Geranium x magnificum	afternoon	Other flies	0	100	2400	0	183	45155bismarckplatz	0
2023-08-17	bismarckplatz	28	Geranium x magnificum	afternoon	Butterflies	0	100	2400	0	183	45155bismarckplatz	0
2023-08-17	bismarckplatz	28	Geranium x magnificum	afternoon	Wasps	0	100	2400	0	183	45155bismarckplatz	0
2023-08-17	bismarckplatz	28	Geranium x magnificum	afternoon	Beetles	0	100	2400	0	183	45155bismarckplatz	0
2023-08-17	bismarckplatz	28	Geranium x magnificum	afternoon	True bugs	0	100	2400	0	183	45155bismarckplatz	0
2023-08-17	bismarckplatz	28	Geranium x magnificum	afternoon	Ants	0	100	2400	0	183	45155bismarckplatz	0
2023-08-17	bismarckplatz	29	Echinacea purpurea "pink"	afternoon	Bumblebees	0	52.5499	1261.2	0	183	45155bismarckplatz	0
2023-08-17	bismarckplatz	29	Echinacea purpurea "pink"	afternoon	Honey bees	2	52.5499	1261.2	15.8579	183	45155bismarckplatz	0
2023-08-17	bismarckplatz	29	Echinacea purpurea "pink"	afternoon	Wild bees	0	52.5499	1261.2	0	183	45155bismarckplatz	0
2023-08-17	bismarckplatz	29	Echinacea purpurea "pink"	afternoon	Hover flies	0	52.5499	1261.2	0	183	45155bismarckplatz	0
2023-08-17	bismarckplatz	29	Echinacea purpurea "pink"	afternoon	Other flies	1	52.5499	1261.2	7.92896	183	45155bismarckplatz	0
2023-08-17	bismarckplatz	29	Echinacea purpurea "pink"	afternoon	Butterflies	0	52.5499	1261.2	0	183	45155bismarckplatz	0
2023-08-17	bismarckplatz	29	Echinacea purpurea "pink"	afternoon	Wasps	0	52.5499	1261.2	0	183	45155bismarckplatz	0
2023-08-17	bismarckplatz	29	Echinacea purpurea "pink"	afternoon	Beetles	0	52.5499	1261.2	0	183	45155bismarckplatz	0
2023-08-17	bismarckplatz	29	Echinacea purpurea "pink"	afternoon	True bugs	0	52.5499	1261.2	0	183	45155bismarckplatz	0
2023-08-17	bismarckplatz	29	Echinacea purpurea "pink"	afternoon	Ants	0	52.5499	1261.2	0	183	45155bismarckplatz	0
2023-08-18	kneippbecken	1	Rudbeckia fulgida	morning	Bumblebees	0	100	2400	0	498	45156kneippbecken	1
2023-08-18	kneippbecken	1	Rudbeckia fulgida	morning	Honey bees	0	100	2400	0	498	45156kneippbecken	0
2023-08-18	kneippbecken	1	Rudbeckia fulgida	morning	Wild bees	1	100	2400	4.16667	498	45156kneippbecken	0
2023-08-18	kneippbecken	1	Rudbeckia fulgida	morning	Hover flies	0	100	2400	0	498	45156kneippbecken	0
2023-08-18	kneippbecken	1	Rudbeckia fulgida	morning	Other flies	1	100	2400	4.16667	498	45156kneippbecken	0
2023-08-18	kneippbecken	1	Rudbeckia fulgida	morning	Butterflies	0	100	2400	0	498	45156kneippbecken	0
2023-08-18	kneippbecken	1	Rudbeckia fulgida	morning	Wasps	0	100	2400	0	498	45156kneippbecken	0
2023-08-18	kneippbecken	1	Rudbeckia fulgida	morning	Beetles	0	100	2400	0	498	45156kneippbecken	0
2023-08-18	kneippbecken	1	Rudbeckia fulgida	morning	True bugs	0	100	2400	0	498	45156kneippbecken	0
2023-08-18	kneippbecken	1	Rudbeckia fulgida	morning	Ants	0	100	2400	0	498	45156kneippbecken	0
2023-08-18	kneippbecken	2	Bistorta affinis	morning	Bumblebees	0	100	2400	0	498	45156kneippbecken	0
2023-08-18	kneippbecken	2	Bistorta affinis	morning	Honey bees	1	100	2400	4.16667	498	45156kneippbecken	0
2023-08-18	kneippbecken	2	Bistorta affinis	morning	Wild bees	2	100	2400	8.33333	498	45156kneippbecken	0
2023-08-18	kneippbecken	2	Bistorta affinis	morning	Hover flies	0	100	2400	0	498	45156kneippbecken	0
2023-08-18	kneippbecken	2	Bistorta affinis	morning	Other flies	2	100	2400	8.33333	498	45156kneippbecken	0
2023-08-18	kneippbecken	2	Bistorta affinis	morning	Butterflies	0	100	2400	0	498	45156kneippbecken	0
2023-08-18	kneippbecken	2	Bistorta affinis	morning	Wasps	0	100	2400	0	498	45156kneippbecken	0
2023-08-18	kneippbecken	2	Bistorta affinis	morning	Beetles	0	100	2400	0	498	45156kneippbecken	0
2023-08-18	kneippbecken	2	Bistorta affinis	morning	True bugs	0	100	2400	0	498	45156kneippbecken	0
2023-08-18	kneippbecken	2	Bistorta affinis	morning	Ants	0	100	2400	0	498	45156kneippbecken	0
2023-08-18	kneippbecken	3	Phlox amplifolia	morning	Bumblebees	0	88.2709	2118.5	0	498	45156kneippbecken	0
2023-08-18	kneippbecken	3	Phlox amplifolia	morning	Honey bees	0	88.2709	2118.5	0	498	45156kneippbecken	0
2023-08-18	kneippbecken	3	Phlox amplifolia	morning	Wild bees	0	88.2709	2118.5	0	498	45156kneippbecken	0
2023-08-18	kneippbecken	3	Phlox amplifolia	morning	Hover flies	0	88.2709	2118.5	0	498	45156kneippbecken	0
2023-08-18	kneippbecken	3	Phlox amplifolia	morning	Other flies	0	88.2709	2118.5	0	498	45156kneippbecken	0
2023-08-18	kneippbecken	3	Phlox amplifolia	morning	Butterflies	0	88.2709	2118.5	0	498	45156kneippbecken	0
2023-08-18	kneippbecken	3	Phlox amplifolia	morning	Wasps	0	88.2709	2118.5	0	498	45156kneippbecken	0
2023-08-18	kneippbecken	3	Phlox amplifolia	morning	Beetles	0	88.2709	2118.5	0	498	45156kneippbecken	0
2023-08-18	kneippbecken	3	Phlox amplifolia	morning	True bugs	0	88.2709	2118.5	0	498	45156kneippbecken	0
2023-08-18	kneippbecken	3	Phlox amplifolia	morning	Ants	0	88.2709	2118.5	0	498	45156kneippbecken	0
2023-08-18	kneippbecken	4	Erynginum planum "Blauer Zwerg"	morning	Bumblebees	0	20.3796	489.111	0	498	45156kneippbecken	0
2023-08-18	kneippbecken	4	Erynginum planum "Blauer Zwerg"	morning	Honey bees	0	20.3796	489.111	0	498	45156kneippbecken	0
2023-08-18	kneippbecken	4	Erynginum planum "Blauer Zwerg"	morning	Wild bees	0	20.3796	489.111	0	498	45156kneippbecken	0
2023-08-18	kneippbecken	4	Erynginum planum "Blauer Zwerg"	morning	Hover flies	0	20.3796	489.111	0	498	45156kneippbecken	0
2023-08-18	kneippbecken	4	Erynginum planum "Blauer Zwerg"	morning	Other flies	0	20.3796	489.111	0	498	45156kneippbecken	0
2023-08-18	kneippbecken	4	Erynginum planum "Blauer Zwerg"	morning	Butterflies	0	20.3796	489.111	0	498	45156kneippbecken	0
2023-08-18	kneippbecken	4	Erynginum planum "Blauer Zwerg"	morning	Wasps	4	20.3796	489.111	81.781	498	45156kneippbecken	0
2023-08-18	kneippbecken	4	Erynginum planum "Blauer Zwerg"	morning	Beetles	0	20.3796	489.111	0	498	45156kneippbecken	0
2023-08-18	kneippbecken	4	Erynginum planum "Blauer Zwerg"	morning	True bugs	0	20.3796	489.111	0	498	45156kneippbecken	0
2023-08-18	kneippbecken	4	Erynginum planum "Blauer Zwerg"	morning	Ants	0	20.3796	489.111	0	498	45156kneippbecken	0
2023-08-18	kneippbecken	5	Erigeron x cultorum	morning	Bumblebees	0	74.2925	1783.02	0	498	45156kneippbecken	0
2023-08-18	kneippbecken	5	Erigeron x cultorum	morning	Honey bees	0	74.2925	1783.02	0	498	45156kneippbecken	0
2023-08-18	kneippbecken	5	Erigeron x cultorum	morning	Wild bees	0	74.2925	1783.02	0	498	45156kneippbecken	0
2023-08-18	kneippbecken	5	Erigeron x cultorum	morning	Hover flies	0	74.2925	1783.02	0	498	45156kneippbecken	0
2023-08-18	kneippbecken	5	Erigeron x cultorum	morning	Other flies	2	74.2925	1783.02	11.2169	498	45156kneippbecken	0
2023-08-18	kneippbecken	5	Erigeron x cultorum	morning	Butterflies	0	74.2925	1783.02	0	498	45156kneippbecken	0
2023-08-18	kneippbecken	5	Erigeron x cultorum	morning	Wasps	0	74.2925	1783.02	0	498	45156kneippbecken	0
2023-08-18	kneippbecken	5	Erigeron x cultorum	morning	Beetles	0	74.2925	1783.02	0	498	45156kneippbecken	0
2023-08-18	kneippbecken	5	Erigeron x cultorum	morning	True bugs	0	74.2925	1783.02	0	498	45156kneippbecken	0
2023-08-18	kneippbecken	5	Erigeron x cultorum	morning	Ants	0	74.2925	1783.02	0	498	45156kneippbecken	0
2023-08-18	kneippbecken	6	Salvia splendens "Red"	morning	Bumblebees	0	80.9874	1943.7	0	498	45156kneippbecken	0
2023-08-18	kneippbecken	6	Salvia splendens "Red"	morning	Honey bees	0	80.9874	1943.7	0	498	45156kneippbecken	0
2023-08-18	kneippbecken	6	Salvia splendens "Red"	morning	Wild bees	0	80.9874	1943.7	0	498	45156kneippbecken	0
2023-08-18	kneippbecken	6	Salvia splendens "Red"	morning	Hover flies	0	80.9874	1943.7	0	498	45156kneippbecken	0
2023-08-18	kneippbecken	6	Salvia splendens "Red"	morning	Other flies	1	80.9874	1943.7	5.14483	498	45156kneippbecken	0
2023-08-18	kneippbecken	6	Salvia splendens "Red"	morning	Butterflies	0	80.9874	1943.7	0	498	45156kneippbecken	0
2023-08-18	kneippbecken	6	Salvia splendens "Red"	morning	Wasps	0	80.9874	1943.7	0	498	45156kneippbecken	0
2023-08-18	kneippbecken	6	Salvia splendens "Red"	morning	Beetles	0	80.9874	1943.7	0	498	45156kneippbecken	0
2023-08-18	kneippbecken	6	Salvia splendens "Red"	morning	True bugs	0	80.9874	1943.7	0	498	45156kneippbecken	0
2023-08-18	kneippbecken	6	Salvia splendens "Red"	morning	Ants	0	80.9874	1943.7	0	498	45156kneippbecken	0
2023-08-18	kneippbecken	7	Erigeron x cultorum	morning	Bumblebees	0	73.8407	1772.18	0	498	45156kneippbecken	0
2023-08-18	kneippbecken	7	Erigeron x cultorum	morning	Honey bees	0	73.8407	1772.18	0	498	45156kneippbecken	0
2023-08-18	kneippbecken	7	Erigeron x cultorum	morning	Wild bees	0	73.8407	1772.18	0	498	45156kneippbecken	0
2023-08-18	kneippbecken	7	Erigeron x cultorum	morning	Hover flies	1	73.8407	1772.18	5.64278	498	45156kneippbecken	0
2023-08-18	kneippbecken	7	Erigeron x cultorum	morning	Other flies	0	73.8407	1772.18	0	498	45156kneippbecken	0
2023-08-18	kneippbecken	7	Erigeron x cultorum	morning	Butterflies	0	73.8407	1772.18	0	498	45156kneippbecken	0
2023-08-18	kneippbecken	7	Erigeron x cultorum	morning	Wasps	0	73.8407	1772.18	0	498	45156kneippbecken	0
2023-08-18	kneippbecken	7	Erigeron x cultorum	morning	Beetles	0	73.8407	1772.18	0	498	45156kneippbecken	0
2023-08-18	kneippbecken	7	Erigeron x cultorum	morning	True bugs	0	73.8407	1772.18	0	498	45156kneippbecken	0
2023-08-18	kneippbecken	7	Erigeron x cultorum	morning	Ants	0	73.8407	1772.18	0	498	45156kneippbecken	0
2023-08-18	kneippbecken	8	Alcaltheae spp.	morning	Bumblebees	0	67.9318	1630.36	0	498	45156kneippbecken	0
2023-08-18	kneippbecken	8	Alcaltheae spp.	morning	Honey bees	0	67.9318	1630.36	0	498	45156kneippbecken	0
2023-08-18	kneippbecken	8	Alcaltheae spp.	morning	Wild bees	0	67.9318	1630.36	0	498	45156kneippbecken	0
2023-08-18	kneippbecken	8	Alcaltheae spp.	morning	Hover flies	0	67.9318	1630.36	0	498	45156kneippbecken	0
2023-08-18	kneippbecken	8	Alcaltheae spp.	morning	Other flies	0	67.9318	1630.36	0	498	45156kneippbecken	0
2023-08-18	kneippbecken	8	Alcaltheae spp.	morning	Butterflies	0	67.9318	1630.36	0	498	45156kneippbecken	0
2023-08-18	kneippbecken	8	Alcaltheae spp.	morning	Wasps	0	67.9318	1630.36	0	498	45156kneippbecken	0
2023-08-18	kneippbecken	8	Alcaltheae spp.	morning	Beetles	0	67.9318	1630.36	0	498	45156kneippbecken	0
2023-08-18	kneippbecken	8	Alcaltheae spp.	morning	True bugs	0	67.9318	1630.36	0	498	45156kneippbecken	0
2023-08-18	kneippbecken	8	Alcaltheae spp.	morning	Ants	0	67.9318	1630.36	0	498	45156kneippbecken	0
2023-08-18	kneippbecken	9	Salvia splendens "purple"	morning	Bumblebees	0	71.8226	1723.74	0	498	45156kneippbecken	0
2023-08-18	kneippbecken	9	Salvia splendens "purple"	morning	Honey bees	1	71.8226	1723.74	5.80133	498	45156kneippbecken	0
2023-08-18	kneippbecken	9	Salvia splendens "purple"	morning	Wild bees	0	71.8226	1723.74	0	498	45156kneippbecken	0
2023-08-18	kneippbecken	9	Salvia splendens "purple"	morning	Hover flies	0	71.8226	1723.74	0	498	45156kneippbecken	0
2023-08-18	kneippbecken	9	Salvia splendens "purple"	morning	Other flies	0	71.8226	1723.74	0	498	45156kneippbecken	0
2023-08-18	kneippbecken	9	Salvia splendens "purple"	morning	Butterflies	0	71.8226	1723.74	0	498	45156kneippbecken	0
2023-08-18	kneippbecken	9	Salvia splendens "purple"	morning	Wasps	0	71.8226	1723.74	0	498	45156kneippbecken	0
2023-08-18	kneippbecken	9	Salvia splendens "purple"	morning	Beetles	0	71.8226	1723.74	0	498	45156kneippbecken	0
2023-08-18	kneippbecken	9	Salvia splendens "purple"	morning	True bugs	0	71.8226	1723.74	0	498	45156kneippbecken	0
2023-08-18	kneippbecken	9	Salvia splendens "purple"	morning	Ants	0	71.8226	1723.74	0	498	45156kneippbecken	0
2023-08-18	kneippbecken	10	Salvia splendens "white"	morning	Bumblebees	0	77.173	1852.15	0	498	45156kneippbecken	0
2023-08-18	kneippbecken	10	Salvia splendens "white"	morning	Honey bees	0	77.173	1852.15	0	498	45156kneippbecken	0
2023-08-18	kneippbecken	10	Salvia splendens "white"	morning	Wild bees	0	77.173	1852.15	0	498	45156kneippbecken	0
2023-08-18	kneippbecken	10	Salvia splendens "white"	morning	Hover flies	0	77.173	1852.15	0	498	45156kneippbecken	0
2023-08-18	kneippbecken	10	Salvia splendens "white"	morning	Other flies	0	77.173	1852.15	0	498	45156kneippbecken	0
2023-08-18	kneippbecken	10	Salvia splendens "white"	morning	Butterflies	0	77.173	1852.15	0	498	45156kneippbecken	0
2023-08-18	kneippbecken	10	Salvia splendens "white"	morning	Wasps	0	77.173	1852.15	0	498	45156kneippbecken	0
2023-08-18	kneippbecken	10	Salvia splendens "white"	morning	Beetles	0	77.173	1852.15	0	498	45156kneippbecken	0
2023-08-18	kneippbecken	10	Salvia splendens "white"	morning	True bugs	1	77.173	1852.15	5.39913	498	45156kneippbecken	0
2023-08-18	kneippbecken	10	Salvia splendens "white"	morning	Ants	2	77.173	1852.15	10.7983	498	45156kneippbecken	0
2023-08-18	kneippbecken	11	Tagetes patula "yellow"	morning	Bumblebees	0	88.7683	2130.44	0	498	45156kneippbecken	0
2023-08-18	kneippbecken	11	Tagetes patula "yellow"	morning	Honey bees	1	88.7683	2130.44	4.69387	498	45156kneippbecken	0
2023-08-18	kneippbecken	11	Tagetes patula "yellow"	morning	Wild bees	0	88.7683	2130.44	0	498	45156kneippbecken	0
2023-08-18	kneippbecken	11	Tagetes patula "yellow"	morning	Hover flies	0	88.7683	2130.44	0	498	45156kneippbecken	0
2023-08-18	kneippbecken	11	Tagetes patula "yellow"	morning	Other flies	0	88.7683	2130.44	0	498	45156kneippbecken	0
2023-08-18	kneippbecken	11	Tagetes patula "yellow"	morning	Butterflies	0	88.7683	2130.44	0	498	45156kneippbecken	0
2023-08-18	kneippbecken	11	Tagetes patula "yellow"	morning	Wasps	0	88.7683	2130.44	0	498	45156kneippbecken	0
2023-08-18	kneippbecken	11	Tagetes patula "yellow"	morning	Beetles	0	88.7683	2130.44	0	498	45156kneippbecken	0
2023-08-18	kneippbecken	11	Tagetes patula "yellow"	morning	True bugs	0	88.7683	2130.44	0	498	45156kneippbecken	0
2023-08-18	kneippbecken	11	Tagetes patula "yellow"	morning	Ants	0	88.7683	2130.44	0	498	45156kneippbecken	0
2023-08-18	kneippbecken	12	Tagetes patula "orange"	morning	Bumblebees	0	78.0775	1873.86	0	498	45156kneippbecken	0
2023-08-18	kneippbecken	12	Tagetes patula "orange"	morning	Honey bees	0	78.0775	1873.86	0	498	45156kneippbecken	0
2023-08-18	kneippbecken	12	Tagetes patula "orange"	morning	Wild bees	0	78.0775	1873.86	0	498	45156kneippbecken	0
2023-08-18	kneippbecken	12	Tagetes patula "orange"	morning	Hover flies	0	78.0775	1873.86	0	498	45156kneippbecken	0
2023-08-18	kneippbecken	12	Tagetes patula "orange"	morning	Other flies	0	78.0775	1873.86	0	498	45156kneippbecken	0
2023-08-18	kneippbecken	12	Tagetes patula "orange"	morning	Butterflies	0	78.0775	1873.86	0	498	45156kneippbecken	0
2023-08-18	kneippbecken	12	Tagetes patula "orange"	morning	Wasps	0	78.0775	1873.86	0	498	45156kneippbecken	0
2023-08-18	kneippbecken	12	Tagetes patula "orange"	morning	Beetles	0	78.0775	1873.86	0	498	45156kneippbecken	0
2023-08-18	kneippbecken	12	Tagetes patula "orange"	morning	True bugs	0	78.0775	1873.86	0	498	45156kneippbecken	0
2023-08-18	kneippbecken	12	Tagetes patula "orange"	morning	Ants	0	78.0775	1873.86	0	498	45156kneippbecken	0
2023-08-18	kneippbecken	13	Salvia farianacea	morning	Bumblebees	1	100	2400	4.16667	498	45156kneippbecken	0
2023-08-18	kneippbecken	13	Salvia farianacea	morning	Honey bees	0	100	2400	0	498	45156kneippbecken	0
2023-08-18	kneippbecken	13	Salvia farianacea	morning	Wild bees	2	100	2400	8.33333	498	45156kneippbecken	0
2023-08-18	kneippbecken	13	Salvia farianacea	morning	Hover flies	0	100	2400	0	498	45156kneippbecken	0
2023-08-18	kneippbecken	13	Salvia farianacea	morning	Other flies	0	100	2400	0	498	45156kneippbecken	0
2023-08-18	kneippbecken	13	Salvia farianacea	morning	Butterflies	0	100	2400	0	498	45156kneippbecken	0
2023-08-18	kneippbecken	13	Salvia farianacea	morning	Wasps	0	100	2400	0	498	45156kneippbecken	0
2023-08-18	kneippbecken	13	Salvia farianacea	morning	Beetles	0	100	2400	0	498	45156kneippbecken	0
2023-08-18	kneippbecken	13	Salvia farianacea	morning	True bugs	1	100	2400	4.16667	498	45156kneippbecken	0
2023-08-18	kneippbecken	13	Salvia farianacea	morning	Ants	0	100	2400	0	498	45156kneippbecken	0
2023-08-18	kneippbecken	14	Echinacea purpurea "pink"	morning	Bumblebees	0	70.9277	1702.26	0	498	45156kneippbecken	0
2023-08-18	kneippbecken	14	Echinacea purpurea "pink"	morning	Honey bees	0	70.9277	1702.26	0	498	45156kneippbecken	0
2023-08-18	kneippbecken	14	Echinacea purpurea "pink"	morning	Wild bees	0	70.9277	1702.26	0	498	45156kneippbecken	0
2023-08-18	kneippbecken	14	Echinacea purpurea "pink"	morning	Hover flies	0	70.9277	1702.26	0	498	45156kneippbecken	0
2023-08-18	kneippbecken	14	Echinacea purpurea "pink"	morning	Other flies	1	70.9277	1702.26	5.87453	498	45156kneippbecken	0
2023-08-18	kneippbecken	14	Echinacea purpurea "pink"	morning	Butterflies	0	70.9277	1702.26	0	498	45156kneippbecken	0
2023-08-18	kneippbecken	14	Echinacea purpurea "pink"	morning	Wasps	0	70.9277	1702.26	0	498	45156kneippbecken	0
2023-08-18	kneippbecken	14	Echinacea purpurea "pink"	morning	Beetles	0	70.9277	1702.26	0	498	45156kneippbecken	0
2023-08-18	kneippbecken	14	Echinacea purpurea "pink"	morning	True bugs	0	70.9277	1702.26	0	498	45156kneippbecken	0
2023-08-18	kneippbecken	14	Echinacea purpurea "pink"	morning	Ants	0	70.9277	1702.26	0	498	45156kneippbecken	0
2023-08-18	kneippbecken	15	Nepeta grandiflora	morning	Bumblebees	0	91.9748	2207.4	0	498	45156kneippbecken	0
2023-08-18	kneippbecken	15	Nepeta grandiflora	morning	Honey bees	0	91.9748	2207.4	0	498	45156kneippbecken	0
2023-08-18	kneippbecken	15	Nepeta grandiflora	morning	Wild bees	1	91.9748	2207.4	4.53022	498	45156kneippbecken	0
2023-08-18	kneippbecken	15	Nepeta grandiflora	morning	Hover flies	0	91.9748	2207.4	0	498	45156kneippbecken	0
2023-08-18	kneippbecken	15	Nepeta grandiflora	morning	Other flies	1	91.9748	2207.4	4.53022	498	45156kneippbecken	0
2023-08-18	kneippbecken	15	Nepeta grandiflora	morning	Butterflies	0	91.9748	2207.4	0	498	45156kneippbecken	0
2023-08-18	kneippbecken	15	Nepeta grandiflora	morning	Wasps	0	91.9748	2207.4	0	498	45156kneippbecken	0
2023-08-18	kneippbecken	15	Nepeta grandiflora	morning	Beetles	0	91.9748	2207.4	0	498	45156kneippbecken	0
2023-08-18	kneippbecken	15	Nepeta grandiflora	morning	True bugs	0	91.9748	2207.4	0	498	45156kneippbecken	0
2023-08-18	kneippbecken	15	Nepeta grandiflora	morning	Ants	0	91.9748	2207.4	0	498	45156kneippbecken	0
2023-08-18	kneippbecken	16	Bistorta affinis	morning	Bumblebees	0	100	2400	0	498	45156kneippbecken	0
2023-08-18	kneippbecken	16	Bistorta affinis	morning	Honey bees	0	100	2400	0	498	45156kneippbecken	0
2023-08-18	kneippbecken	16	Bistorta affinis	morning	Wild bees	0	100	2400	0	498	45156kneippbecken	0
2023-08-18	kneippbecken	16	Bistorta affinis	morning	Hover flies	0	100	2400	0	498	45156kneippbecken	0
2023-08-18	kneippbecken	16	Bistorta affinis	morning	Other flies	0	100	2400	0	498	45156kneippbecken	0
2023-08-18	kneippbecken	16	Bistorta affinis	morning	Butterflies	0	100	2400	0	498	45156kneippbecken	0
2023-08-18	kneippbecken	16	Bistorta affinis	morning	Wasps	2	100	2400	8.33333	498	45156kneippbecken	0
2023-08-18	kneippbecken	16	Bistorta affinis	morning	Beetles	0	100	2400	0	498	45156kneippbecken	0
2023-08-18	kneippbecken	16	Bistorta affinis	morning	True bugs	0	100	2400	0	498	45156kneippbecken	0
2023-08-18	kneippbecken	16	Bistorta affinis	morning	Ants	0	100	2400	0	498	45156kneippbecken	0
2023-08-18	kneippbecken	17	Sedum telephium	morning	Bumblebees	0	88.2093	2117.02	0	498	45156kneippbecken	0
2023-08-18	kneippbecken	17	Sedum telephium	morning	Honey bees	1	88.2093	2117.02	4.72361	498	45156kneippbecken	0
2023-08-18	kneippbecken	17	Sedum telephium	morning	Wild bees	2	88.2093	2117.02	9.44723	498	45156kneippbecken	0
2023-08-18	kneippbecken	17	Sedum telephium	morning	Hover flies	0	88.2093	2117.02	0	498	45156kneippbecken	0
2023-08-18	kneippbecken	17	Sedum telephium	morning	Other flies	1	88.2093	2117.02	4.72361	498	45156kneippbecken	0
2023-08-18	kneippbecken	17	Sedum telephium	morning	Butterflies	0	88.2093	2117.02	0	498	45156kneippbecken	0
2023-08-18	kneippbecken	17	Sedum telephium	morning	Wasps	0	88.2093	2117.02	0	498	45156kneippbecken	0
2023-08-18	kneippbecken	17	Sedum telephium	morning	Beetles	0	88.2093	2117.02	0	498	45156kneippbecken	0
2023-08-18	kneippbecken	17	Sedum telephium	morning	True bugs	0	88.2093	2117.02	0	498	45156kneippbecken	0
2023-08-18	kneippbecken	17	Sedum telephium	morning	Ants	0	88.2093	2117.02	0	498	45156kneippbecken	0
2023-08-18	kneippbecken	18	Sedum telephium	morning	Bumblebees	0	79.8294	1915.91	0	498	45156kneippbecken	0
2023-08-18	kneippbecken	18	Sedum telephium	morning	Honey bees	0	79.8294	1915.91	0	498	45156kneippbecken	0
2023-08-18	kneippbecken	18	Sedum telephium	morning	Wild bees	0	79.8294	1915.91	0	498	45156kneippbecken	0
2023-08-18	kneippbecken	18	Sedum telephium	morning	Hover flies	0	79.8294	1915.91	0	498	45156kneippbecken	0
2023-08-18	kneippbecken	18	Sedum telephium	morning	Other flies	0	79.8294	1915.91	0	498	45156kneippbecken	0
2023-08-18	kneippbecken	18	Sedum telephium	morning	Butterflies	0	79.8294	1915.91	0	498	45156kneippbecken	0
2023-08-18	kneippbecken	18	Sedum telephium	morning	Wasps	1	79.8294	1915.91	5.21946	498	45156kneippbecken	0
2023-08-18	kneippbecken	18	Sedum telephium	morning	Beetles	0	79.8294	1915.91	0	498	45156kneippbecken	0
2023-08-18	kneippbecken	18	Sedum telephium	morning	True bugs	0	79.8294	1915.91	0	498	45156kneippbecken	0
2023-08-18	kneippbecken	18	Sedum telephium	morning	Ants	0	79.8294	1915.91	0	498	45156kneippbecken	0
2023-08-18	augsburger_strasse	19	Salvia yangii	morning	Bumblebees	0	100	2400	0	50	45156augsburger_strasse	1
2023-08-18	augsburger_strasse	19	Salvia yangii	morning	Honey bees	6	100	2400	25	50	45156augsburger_strasse	0
2023-08-18	augsburger_strasse	19	Salvia yangii	morning	Wild bees	0	100	2400	0	50	45156augsburger_strasse	0
2023-08-18	augsburger_strasse	19	Salvia yangii	morning	Hover flies	0	100	2400	0	50	45156augsburger_strasse	0
2023-08-18	augsburger_strasse	19	Salvia yangii	morning	Other flies	0	100	2400	0	50	45156augsburger_strasse	0
2023-08-18	augsburger_strasse	19	Salvia yangii	morning	Butterflies	0	100	2400	0	50	45156augsburger_strasse	0
2023-08-18	augsburger_strasse	19	Salvia yangii	morning	Wasps	0	100	2400	0	50	45156augsburger_strasse	0
2023-08-18	augsburger_strasse	19	Salvia yangii	morning	Beetles	0	100	2400	0	50	45156augsburger_strasse	0
2023-08-18	augsburger_strasse	19	Salvia yangii	morning	True bugs	0	100	2400	0	50	45156augsburger_strasse	0
2023-08-18	augsburger_strasse	19	Salvia yangii	morning	Ants	0	100	2400	0	50	45156augsburger_strasse	0
2023-08-18	augsburger_strasse	20	Achillea filipendulina	morning	Bumblebees	0	100	2400	0	50	45156augsburger_strasse	0
2023-08-18	augsburger_strasse	20	Achillea filipendulina	morning	Honey bees	0	100	2400	0	50	45156augsburger_strasse	0
2023-08-18	augsburger_strasse	20	Achillea filipendulina	morning	Wild bees	0	100	2400	0	50	45156augsburger_strasse	0
2023-08-18	augsburger_strasse	20	Achillea filipendulina	morning	Hover flies	0	100	2400	0	50	45156augsburger_strasse	0
2023-08-18	augsburger_strasse	20	Achillea filipendulina	morning	Other flies	2	100	2400	8.33333	50	45156augsburger_strasse	0
2023-08-18	augsburger_strasse	20	Achillea filipendulina	morning	Butterflies	0	100	2400	0	50	45156augsburger_strasse	0
2023-08-18	augsburger_strasse	20	Achillea filipendulina	morning	Wasps	0	100	2400	0	50	45156augsburger_strasse	0
2023-08-18	augsburger_strasse	20	Achillea filipendulina	morning	Beetles	0	100	2400	0	50	45156augsburger_strasse	0
2023-08-18	augsburger_strasse	20	Achillea filipendulina	morning	True bugs	0	100	2400	0	50	45156augsburger_strasse	0
2023-08-18	augsburger_strasse	20	Achillea filipendulina	morning	Ants	0	100	2400	0	50	45156augsburger_strasse	0
2023-08-18	augsburger_strasse	21	Hydrangea macrophylla	morning	Bumblebees	0	100	2400	0	50	45156augsburger_strasse	0
2023-08-18	augsburger_strasse	21	Hydrangea macrophylla	morning	Honey bees	0	100	2400	0	50	45156augsburger_strasse	0
2023-08-18	augsburger_strasse	21	Hydrangea macrophylla	morning	Wild bees	0	100	2400	0	50	45156augsburger_strasse	0
2023-08-18	augsburger_strasse	21	Hydrangea macrophylla	morning	Hover flies	0	100	2400	0	50	45156augsburger_strasse	0
2023-08-18	augsburger_strasse	21	Hydrangea macrophylla	morning	Other flies	0	100	2400	0	50	45156augsburger_strasse	0
2023-08-18	augsburger_strasse	21	Hydrangea macrophylla	morning	Butterflies	0	100	2400	0	50	45156augsburger_strasse	0
2023-08-18	augsburger_strasse	21	Hydrangea macrophylla	morning	Wasps	0	100	2400	0	50	45156augsburger_strasse	0
2023-08-18	augsburger_strasse	21	Hydrangea macrophylla	morning	Beetles	0	100	2400	0	50	45156augsburger_strasse	0
2023-08-18	augsburger_strasse	21	Hydrangea macrophylla	morning	True bugs	0	100	2400	0	50	45156augsburger_strasse	0
2023-08-18	augsburger_strasse	21	Hydrangea macrophylla	morning	Ants	0	100	2400	0	50	45156augsburger_strasse	0
2023-08-18	augsburger_strasse	22	Rudbeckia fulgida	morning	Bumblebees	0	70.2952	1687.09	0	50	45156augsburger_strasse	0
2023-08-18	augsburger_strasse	22	Rudbeckia fulgida	morning	Honey bees	1	70.2952	1687.09	5.92738	50	45156augsburger_strasse	0
2023-08-18	augsburger_strasse	22	Rudbeckia fulgida	morning	Wild bees	0	70.2952	1687.09	0	50	45156augsburger_strasse	0
2023-08-18	augsburger_strasse	22	Rudbeckia fulgida	morning	Hover flies	0	70.2952	1687.09	0	50	45156augsburger_strasse	0
2023-08-18	augsburger_strasse	22	Rudbeckia fulgida	morning	Other flies	0	70.2952	1687.09	0	50	45156augsburger_strasse	0
2023-08-18	augsburger_strasse	22	Rudbeckia fulgida	morning	Butterflies	0	70.2952	1687.09	0	50	45156augsburger_strasse	0
2023-08-18	augsburger_strasse	22	Rudbeckia fulgida	morning	Wasps	0	70.2952	1687.09	0	50	45156augsburger_strasse	0
2023-08-18	augsburger_strasse	22	Rudbeckia fulgida	morning	Beetles	0	70.2952	1687.09	0	50	45156augsburger_strasse	0
2023-08-18	augsburger_strasse	22	Rudbeckia fulgida	morning	True bugs	0	70.2952	1687.09	0	50	45156augsburger_strasse	0
2023-08-18	augsburger_strasse	22	Rudbeckia fulgida	morning	Ants	0	70.2952	1687.09	0	50	45156augsburger_strasse	0
2023-08-18	augsburger_strasse	23	Geranium x magnificum	morning	Bumblebees	0	74.3171	1783.61	0	50	45156augsburger_strasse	0
2023-08-18	augsburger_strasse	23	Geranium x magnificum	morning	Honey bees	0	74.3171	1783.61	0	50	45156augsburger_strasse	0
2023-08-18	augsburger_strasse	23	Geranium x magnificum	morning	Wild bees	0	74.3171	1783.61	0	50	45156augsburger_strasse	0
2023-08-18	augsburger_strasse	23	Geranium x magnificum	morning	Hover flies	0	74.3171	1783.61	0	50	45156augsburger_strasse	0
2023-08-18	augsburger_strasse	23	Geranium x magnificum	morning	Other flies	0	74.3171	1783.61	0	50	45156augsburger_strasse	0
2023-08-18	augsburger_strasse	23	Geranium x magnificum	morning	Butterflies	0	74.3171	1783.61	0	50	45156augsburger_strasse	0
2023-08-18	augsburger_strasse	23	Geranium x magnificum	morning	Wasps	0	74.3171	1783.61	0	50	45156augsburger_strasse	0
2023-08-18	augsburger_strasse	23	Geranium x magnificum	morning	Beetles	0	74.3171	1783.61	0	50	45156augsburger_strasse	0
2023-08-18	augsburger_strasse	23	Geranium x magnificum	morning	True bugs	0	74.3171	1783.61	0	50	45156augsburger_strasse	0
2023-08-18	augsburger_strasse	23	Geranium x magnificum	morning	Ants	0	74.3171	1783.61	0	50	45156augsburger_strasse	0
2023-08-18	augsburger_strasse	24	Salvia farianacea	morning	Bumblebees	0	91.9874	2207.7	0	50	45156augsburger_strasse	0
2023-08-18	augsburger_strasse	24	Salvia farianacea	morning	Honey bees	4	91.9874	2207.7	18.1184	50	45156augsburger_strasse	0
2023-08-18	augsburger_strasse	24	Salvia farianacea	morning	Wild bees	1	91.9874	2207.7	4.5296	50	45156augsburger_strasse	0
2023-08-18	augsburger_strasse	24	Salvia farianacea	morning	Hover flies	0	91.9874	2207.7	0	50	45156augsburger_strasse	0
2023-08-18	augsburger_strasse	24	Salvia farianacea	morning	Other flies	0	91.9874	2207.7	0	50	45156augsburger_strasse	0
2023-08-18	augsburger_strasse	24	Salvia farianacea	morning	Butterflies	0	91.9874	2207.7	0	50	45156augsburger_strasse	0
2023-08-18	augsburger_strasse	24	Salvia farianacea	morning	Wasps	0	91.9874	2207.7	0	50	45156augsburger_strasse	0
2023-08-18	augsburger_strasse	24	Salvia farianacea	morning	Beetles	0	91.9874	2207.7	0	50	45156augsburger_strasse	0
2023-08-18	augsburger_strasse	24	Salvia farianacea	morning	True bugs	0	91.9874	2207.7	0	50	45156augsburger_strasse	0
2023-08-18	augsburger_strasse	24	Salvia farianacea	morning	Ants	0	91.9874	2207.7	0	50	45156augsburger_strasse	0
2023-08-18	augsburger_strasse	25	Echinacea purpurea "pink"	morning	Bumblebees	0	59.4239	1426.17	0	50	45156augsburger_strasse	0
2023-08-18	augsburger_strasse	25	Echinacea purpurea "pink"	morning	Honey bees	3	59.4239	1426.17	21.0353	50	45156augsburger_strasse	0
2023-08-18	augsburger_strasse	25	Echinacea purpurea "pink"	morning	Wild bees	0	59.4239	1426.17	0	50	45156augsburger_strasse	0
2023-08-18	augsburger_strasse	25	Echinacea purpurea "pink"	morning	Hover flies	0	59.4239	1426.17	0	50	45156augsburger_strasse	0
2023-08-18	augsburger_strasse	25	Echinacea purpurea "pink"	morning	Other flies	0	59.4239	1426.17	0	50	45156augsburger_strasse	0
2023-08-18	augsburger_strasse	25	Echinacea purpurea "pink"	morning	Butterflies	0	59.4239	1426.17	0	50	45156augsburger_strasse	0
2023-08-18	augsburger_strasse	25	Echinacea purpurea "pink"	morning	Wasps	0	59.4239	1426.17	0	50	45156augsburger_strasse	0
2023-08-18	augsburger_strasse	25	Echinacea purpurea "pink"	morning	Beetles	0	59.4239	1426.17	0	50	45156augsburger_strasse	0
2023-08-18	augsburger_strasse	25	Echinacea purpurea "pink"	morning	True bugs	0	59.4239	1426.17	0	50	45156augsburger_strasse	0
2023-08-18	augsburger_strasse	25	Echinacea purpurea "pink"	morning	Ants	0	59.4239	1426.17	0	50	45156augsburger_strasse	0
2023-08-18	augsburger_strasse	26	Aster ageratoides	morning	Bumblebees	0	100	2400	0	50	45156augsburger_strasse	0
2023-08-18	augsburger_strasse	26	Aster ageratoides	morning	Honey bees	3	100	2400	12.5	50	45156augsburger_strasse	0
2023-08-18	augsburger_strasse	26	Aster ageratoides	morning	Wild bees	1	100	2400	4.16667	50	45156augsburger_strasse	0
2023-08-18	augsburger_strasse	26	Aster ageratoides	morning	Hover flies	0	100	2400	0	50	45156augsburger_strasse	0
2023-08-18	augsburger_strasse	26	Aster ageratoides	morning	Other flies	0	100	2400	0	50	45156augsburger_strasse	0
2023-08-18	augsburger_strasse	26	Aster ageratoides	morning	Butterflies	0	100	2400	0	50	45156augsburger_strasse	0
2023-08-18	augsburger_strasse	26	Aster ageratoides	morning	Wasps	0	100	2400	0	50	45156augsburger_strasse	0
2023-08-18	augsburger_strasse	26	Aster ageratoides	morning	Beetles	0	100	2400	0	50	45156augsburger_strasse	0
2023-08-18	augsburger_strasse	26	Aster ageratoides	morning	True bugs	0	100	2400	0	50	45156augsburger_strasse	0
2023-08-18	augsburger_strasse	26	Aster ageratoides	morning	Ants	0	100	2400	0	50	45156augsburger_strasse	0
2023-08-18	augsburger_strasse	27	Rudbeckia fulgida	morning	Bumblebees	0	100	2400	0	50	45156augsburger_strasse	0
2023-08-18	augsburger_strasse	27	Rudbeckia fulgida	morning	Honey bees	1	100	2400	4.16667	50	45156augsburger_strasse	0
2023-08-18	augsburger_strasse	27	Rudbeckia fulgida	morning	Wild bees	0	100	2400	0	50	45156augsburger_strasse	0
2023-08-18	augsburger_strasse	27	Rudbeckia fulgida	morning	Hover flies	0	100	2400	0	50	45156augsburger_strasse	0
2023-08-18	augsburger_strasse	27	Rudbeckia fulgida	morning	Other flies	0	100	2400	0	50	45156augsburger_strasse	0
2023-08-18	augsburger_strasse	27	Rudbeckia fulgida	morning	Butterflies	0	100	2400	0	50	45156augsburger_strasse	0
2023-08-18	augsburger_strasse	27	Rudbeckia fulgida	morning	Wasps	0	100	2400	0	50	45156augsburger_strasse	0
2023-08-18	augsburger_strasse	27	Rudbeckia fulgida	morning	Beetles	0	100	2400	0	50	45156augsburger_strasse	0
2023-08-18	augsburger_strasse	27	Rudbeckia fulgida	morning	True bugs	0	100	2400	0	50	45156augsburger_strasse	0
2023-08-18	augsburger_strasse	27	Rudbeckia fulgida	morning	Ants	0	100	2400	0	50	45156augsburger_strasse	0
2023-08-18	augsburger_strasse	28	Rudbeckia fulgida	morning	Bumblebees	0	80.9002	1941.61	0	50	45156augsburger_strasse	0
2023-08-18	augsburger_strasse	28	Rudbeckia fulgida	morning	Honey bees	0	80.9002	1941.61	0	50	45156augsburger_strasse	0
2023-08-18	augsburger_strasse	28	Rudbeckia fulgida	morning	Wild bees	0	80.9002	1941.61	0	50	45156augsburger_strasse	0
2023-08-18	augsburger_strasse	28	Rudbeckia fulgida	morning	Hover flies	0	80.9002	1941.61	0	50	45156augsburger_strasse	0
2023-08-18	augsburger_strasse	28	Rudbeckia fulgida	morning	Other flies	0	80.9002	1941.61	0	50	45156augsburger_strasse	0
2023-08-18	augsburger_strasse	28	Rudbeckia fulgida	morning	Butterflies	0	80.9002	1941.61	0	50	45156augsburger_strasse	0
2023-08-18	augsburger_strasse	28	Rudbeckia fulgida	morning	Wasps	0	80.9002	1941.61	0	50	45156augsburger_strasse	0
2023-08-18	augsburger_strasse	28	Rudbeckia fulgida	morning	Beetles	0	80.9002	1941.61	0	50	45156augsburger_strasse	0
2023-08-18	augsburger_strasse	28	Rudbeckia fulgida	morning	True bugs	0	80.9002	1941.61	0	50	45156augsburger_strasse	0
2023-08-18	augsburger_strasse	28	Rudbeckia fulgida	morning	Ants	0	80.9002	1941.61	0	50	45156augsburger_strasse	0
2023-08-18	augsburger_strasse	29	Sedum telephium	morning	Bumblebees	0	70.5115	1692.28	0	50	45156augsburger_strasse	0
2023-08-18	augsburger_strasse	29	Sedum telephium	morning	Honey bees	0	70.5115	1692.28	0	50	45156augsburger_strasse	0
2023-08-18	augsburger_strasse	29	Sedum telephium	morning	Wild bees	0	70.5115	1692.28	0	50	45156augsburger_strasse	0
2023-08-18	augsburger_strasse	29	Sedum telephium	morning	Hover flies	0	70.5115	1692.28	0	50	45156augsburger_strasse	0
2023-08-18	augsburger_strasse	29	Sedum telephium	morning	Other flies	0	70.5115	1692.28	0	50	45156augsburger_strasse	0
2023-08-18	augsburger_strasse	29	Sedum telephium	morning	Butterflies	0	70.5115	1692.28	0	50	45156augsburger_strasse	0
2023-08-18	augsburger_strasse	29	Sedum telephium	morning	Wasps	0	70.5115	1692.28	0	50	45156augsburger_strasse	0
2023-08-18	augsburger_strasse	29	Sedum telephium	morning	Beetles	0	70.5115	1692.28	0	50	45156augsburger_strasse	0
2023-08-18	augsburger_strasse	29	Sedum telephium	morning	True bugs	0	70.5115	1692.28	0	50	45156augsburger_strasse	0
2023-08-18	augsburger_strasse	29	Sedum telephium	morning	Ants	0	70.5115	1692.28	0	50	45156augsburger_strasse	0
2023-08-18	herzogspark	1	Geranium x magnificum	afternoon	Bumblebees	0	100	2400	0	1938	45156herzogspark	1
2023-08-18	herzogspark	1	Geranium x magnificum	afternoon	Honey bees	0	100	2400	0	1938	45156herzogspark	0
2023-08-18	herzogspark	1	Geranium x magnificum	afternoon	Wild bees	1	100	2400	4.16667	1938	45156herzogspark	0
2023-08-18	herzogspark	1	Geranium x magnificum	afternoon	Hover flies	0	100	2400	0	1938	45156herzogspark	0
2023-08-18	herzogspark	1	Geranium x magnificum	afternoon	Other flies	1	100	2400	4.16667	1938	45156herzogspark	0
2023-08-18	herzogspark	1	Geranium x magnificum	afternoon	Butterflies	0	100	2400	0	1938	45156herzogspark	0
2023-08-18	herzogspark	1	Geranium x magnificum	afternoon	Wasps	0	100	2400	0	1938	45156herzogspark	0
2023-08-18	herzogspark	1	Geranium x magnificum	afternoon	Beetles	0	100	2400	0	1938	45156herzogspark	0
2023-08-18	herzogspark	1	Geranium x magnificum	afternoon	True bugs	0	100	2400	0	1938	45156herzogspark	0
2023-08-18	herzogspark	1	Geranium x magnificum	afternoon	Ants	1	100	2400	4.16667	1938	45156herzogspark	0
2023-08-18	herzogspark	2	Hosta x cultorum "Funkie"	afternoon	Bumblebees	0	90.7782	2178.68	0	1938	45156herzogspark	0
2023-08-18	herzogspark	2	Hosta x cultorum "Funkie"	afternoon	Honey bees	0	90.7782	2178.68	0	1938	45156herzogspark	0
2023-08-18	herzogspark	2	Hosta x cultorum "Funkie"	afternoon	Wild bees	0	90.7782	2178.68	0	1938	45156herzogspark	0
2023-08-18	herzogspark	2	Hosta x cultorum "Funkie"	afternoon	Hover flies	0	90.7782	2178.68	0	1938	45156herzogspark	0
2023-08-18	herzogspark	2	Hosta x cultorum "Funkie"	afternoon	Other flies	0	90.7782	2178.68	0	1938	45156herzogspark	0
2023-08-18	herzogspark	2	Hosta x cultorum "Funkie"	afternoon	Butterflies	0	90.7782	2178.68	0	1938	45156herzogspark	0
2023-08-18	herzogspark	2	Hosta x cultorum "Funkie"	afternoon	Wasps	0	90.7782	2178.68	0	1938	45156herzogspark	0
2023-08-18	herzogspark	2	Hosta x cultorum "Funkie"	afternoon	Beetles	0	90.7782	2178.68	0	1938	45156herzogspark	0
2023-08-18	herzogspark	2	Hosta x cultorum "Funkie"	afternoon	True bugs	0	90.7782	2178.68	0	1938	45156herzogspark	0
2023-08-18	herzogspark	2	Hosta x cultorum "Funkie"	afternoon	Ants	0	90.7782	2178.68	0	1938	45156herzogspark	0
2023-08-18	herzogspark	3	Anemone japonica	afternoon	Bumblebees	0	71.0771	1705.85	0	1938	45156herzogspark	0
2023-08-18	herzogspark	3	Anemone japonica	afternoon	Honey bees	2	71.0771	1705.85	11.7244	1938	45156herzogspark	0
2023-08-18	herzogspark	3	Anemone japonica	afternoon	Wild bees	0	71.0771	1705.85	0	1938	45156herzogspark	0
2023-08-18	herzogspark	3	Anemone japonica	afternoon	Hover flies	0	71.0771	1705.85	0	1938	45156herzogspark	0
2023-08-18	herzogspark	3	Anemone japonica	afternoon	Other flies	0	71.0771	1705.85	0	1938	45156herzogspark	0
2023-08-18	herzogspark	3	Anemone japonica	afternoon	Butterflies	0	71.0771	1705.85	0	1938	45156herzogspark	0
2023-08-18	herzogspark	3	Anemone japonica	afternoon	Wasps	0	71.0771	1705.85	0	1938	45156herzogspark	0
2023-08-18	herzogspark	3	Anemone japonica	afternoon	Beetles	0	71.0771	1705.85	0	1938	45156herzogspark	0
2023-08-18	herzogspark	3	Anemone japonica	afternoon	True bugs	0	71.0771	1705.85	0	1938	45156herzogspark	0
2023-08-18	herzogspark	3	Anemone japonica	afternoon	Ants	0	71.0771	1705.85	0	1938	45156herzogspark	0
2023-08-18	herzogspark	4	Geranium x magnificum	afternoon	Bumblebees	0	85.4795	2051.51	0	1938	45156herzogspark	0
2023-08-18	herzogspark	4	Geranium x magnificum	afternoon	Honey bees	1	85.4795	2051.51	4.87446	1938	45156herzogspark	0
2023-08-18	herzogspark	4	Geranium x magnificum	afternoon	Wild bees	0	85.4795	2051.51	0	1938	45156herzogspark	0
2023-08-18	herzogspark	4	Geranium x magnificum	afternoon	Hover flies	0	85.4795	2051.51	0	1938	45156herzogspark	0
2023-08-18	herzogspark	4	Geranium x magnificum	afternoon	Other flies	0	85.4795	2051.51	0	1938	45156herzogspark	0
2023-08-18	herzogspark	4	Geranium x magnificum	afternoon	Butterflies	0	85.4795	2051.51	0	1938	45156herzogspark	0
2023-08-18	herzogspark	4	Geranium x magnificum	afternoon	Wasps	0	85.4795	2051.51	0	1938	45156herzogspark	0
2023-08-18	herzogspark	4	Geranium x magnificum	afternoon	Beetles	0	85.4795	2051.51	0	1938	45156herzogspark	0
2023-08-18	herzogspark	4	Geranium x magnificum	afternoon	True bugs	0	85.4795	2051.51	0	1938	45156herzogspark	0
2023-08-18	herzogspark	4	Geranium x magnificum	afternoon	Ants	0	85.4795	2051.51	0	1938	45156herzogspark	0
2023-08-18	herzogspark	5	Echinacea purpurea "pink"	afternoon	Bumblebees	0	100	2400	0	1938	45156herzogspark	0
2023-08-18	herzogspark	5	Echinacea purpurea "pink"	afternoon	Honey bees	4	100	2400	16.6667	1938	45156herzogspark	0
2023-08-18	herzogspark	5	Echinacea purpurea "pink"	afternoon	Wild bees	1	100	2400	4.16667	1938	45156herzogspark	0
2023-08-18	herzogspark	5	Echinacea purpurea "pink"	afternoon	Hover flies	0	100	2400	0	1938	45156herzogspark	0
2023-08-18	herzogspark	5	Echinacea purpurea "pink"	afternoon	Other flies	1	100	2400	4.16667	1938	45156herzogspark	0
2023-08-18	herzogspark	5	Echinacea purpurea "pink"	afternoon	Butterflies	0	100	2400	0	1938	45156herzogspark	0
2023-08-18	herzogspark	5	Echinacea purpurea "pink"	afternoon	Wasps	0	100	2400	0	1938	45156herzogspark	0
2023-08-18	herzogspark	5	Echinacea purpurea "pink"	afternoon	Beetles	0	100	2400	0	1938	45156herzogspark	0
2023-08-18	herzogspark	5	Echinacea purpurea "pink"	afternoon	True bugs	0	100	2400	0	1938	45156herzogspark	0
2023-08-18	herzogspark	5	Echinacea purpurea "pink"	afternoon	Ants	0	100	2400	0	1938	45156herzogspark	0
2023-08-18	herzogspark	6	Echinacea purpurea "Alba"	afternoon	Bumblebees	0	68.3152	1639.56	0	1938	45156herzogspark	0
2023-08-18	herzogspark	6	Echinacea purpurea "Alba"	afternoon	Honey bees	2	68.3152	1639.56	12.1984	1938	45156herzogspark	0
2023-08-18	herzogspark	6	Echinacea purpurea "Alba"	afternoon	Wild bees	0	68.3152	1639.56	0	1938	45156herzogspark	0
2023-08-18	herzogspark	6	Echinacea purpurea "Alba"	afternoon	Hover flies	0	68.3152	1639.56	0	1938	45156herzogspark	0
2023-08-18	herzogspark	6	Echinacea purpurea "Alba"	afternoon	Other flies	0	68.3152	1639.56	0	1938	45156herzogspark	0
2023-08-18	herzogspark	6	Echinacea purpurea "Alba"	afternoon	Butterflies	0	68.3152	1639.56	0	1938	45156herzogspark	0
2023-08-18	herzogspark	6	Echinacea purpurea "Alba"	afternoon	Wasps	0	68.3152	1639.56	0	1938	45156herzogspark	0
2023-08-18	herzogspark	6	Echinacea purpurea "Alba"	afternoon	Beetles	0	68.3152	1639.56	0	1938	45156herzogspark	0
2023-08-18	herzogspark	6	Echinacea purpurea "Alba"	afternoon	True bugs	0	68.3152	1639.56	0	1938	45156herzogspark	0
2023-08-18	herzogspark	6	Echinacea purpurea "Alba"	afternoon	Ants	0	68.3152	1639.56	0	1938	45156herzogspark	0
2023-08-18	herzogspark	7	Geranium x magnificum	afternoon	Bumblebees	0	78.4526	1882.86	0	1938	45156herzogspark	0
2023-08-18	herzogspark	7	Geranium x magnificum	afternoon	Honey bees	0	78.4526	1882.86	0	1938	45156herzogspark	0
2023-08-18	herzogspark	7	Geranium x magnificum	afternoon	Wild bees	0	78.4526	1882.86	0	1938	45156herzogspark	0
2023-08-18	herzogspark	7	Geranium x magnificum	afternoon	Hover flies	0	78.4526	1882.86	0	1938	45156herzogspark	0
2023-08-18	herzogspark	7	Geranium x magnificum	afternoon	Other flies	0	78.4526	1882.86	0	1938	45156herzogspark	0
2023-08-18	herzogspark	7	Geranium x magnificum	afternoon	Butterflies	0	78.4526	1882.86	0	1938	45156herzogspark	0
2023-08-18	herzogspark	7	Geranium x magnificum	afternoon	Wasps	0	78.4526	1882.86	0	1938	45156herzogspark	0
2023-08-18	herzogspark	7	Geranium x magnificum	afternoon	Beetles	0	78.4526	1882.86	0	1938	45156herzogspark	0
2023-08-18	herzogspark	7	Geranium x magnificum	afternoon	True bugs	0	78.4526	1882.86	0	1938	45156herzogspark	0
2023-08-18	herzogspark	7	Geranium x magnificum	afternoon	Ants	0	78.4526	1882.86	0	1938	45156herzogspark	0
2023-08-18	herzogspark	8	Rudbeckia fulgida	afternoon	Bumblebees	0	76.8914	1845.39	0	1938	45156herzogspark	0
2023-08-18	herzogspark	8	Rudbeckia fulgida	afternoon	Honey bees	0	76.8914	1845.39	0	1938	45156herzogspark	0
2023-08-18	herzogspark	8	Rudbeckia fulgida	afternoon	Wild bees	0	76.8914	1845.39	0	1938	45156herzogspark	0
2023-08-18	herzogspark	8	Rudbeckia fulgida	afternoon	Hover flies	0	76.8914	1845.39	0	1938	45156herzogspark	0
2023-08-18	herzogspark	8	Rudbeckia fulgida	afternoon	Other flies	0	76.8914	1845.39	0	1938	45156herzogspark	0
2023-08-18	herzogspark	8	Rudbeckia fulgida	afternoon	Butterflies	0	76.8914	1845.39	0	1938	45156herzogspark	0
2023-08-18	herzogspark	8	Rudbeckia fulgida	afternoon	Wasps	0	76.8914	1845.39	0	1938	45156herzogspark	0
2023-08-18	herzogspark	8	Rudbeckia fulgida	afternoon	Beetles	0	76.8914	1845.39	0	1938	45156herzogspark	0
2023-08-18	herzogspark	8	Rudbeckia fulgida	afternoon	True bugs	0	76.8914	1845.39	0	1938	45156herzogspark	0
2023-08-18	herzogspark	8	Rudbeckia fulgida	afternoon	Ants	0	76.8914	1845.39	0	1938	45156herzogspark	0
2023-08-18	herzogspark	9	Campanula persicifolia	afternoon	Bumblebees	0	41.2738	990.572	0	1938	45156herzogspark	0
2023-08-18	herzogspark	9	Campanula persicifolia	afternoon	Honey bees	1	41.2738	990.572	10.0952	1938	45156herzogspark	0
2023-08-18	herzogspark	9	Campanula persicifolia	afternoon	Wild bees	1	41.2738	990.572	10.0952	1938	45156herzogspark	0
2023-08-18	herzogspark	9	Campanula persicifolia	afternoon	Hover flies	0	41.2738	990.572	0	1938	45156herzogspark	0
2023-08-18	herzogspark	9	Campanula persicifolia	afternoon	Other flies	0	41.2738	990.572	0	1938	45156herzogspark	0
2023-08-18	herzogspark	9	Campanula persicifolia	afternoon	Butterflies	0	41.2738	990.572	0	1938	45156herzogspark	0
2023-08-18	herzogspark	9	Campanula persicifolia	afternoon	Wasps	0	41.2738	990.572	0	1938	45156herzogspark	0
2023-08-18	herzogspark	9	Campanula persicifolia	afternoon	Beetles	0	41.2738	990.572	0	1938	45156herzogspark	0
2023-08-18	herzogspark	9	Campanula persicifolia	afternoon	True bugs	0	41.2738	990.572	0	1938	45156herzogspark	0
2023-08-18	herzogspark	9	Campanula persicifolia	afternoon	Ants	0	41.2738	990.572	0	1938	45156herzogspark	0
2023-08-18	herzogspark	10	Salvia farianacea	afternoon	Bumblebees	0	100	2400	0	1938	45156herzogspark	0
2023-08-18	herzogspark	10	Salvia farianacea	afternoon	Honey bees	0	100	2400	0	1938	45156herzogspark	0
2023-08-18	herzogspark	10	Salvia farianacea	afternoon	Wild bees	1	100	2400	4.16667	1938	45156herzogspark	0
2023-08-18	herzogspark	10	Salvia farianacea	afternoon	Hover flies	0	100	2400	0	1938	45156herzogspark	0
2023-08-18	herzogspark	10	Salvia farianacea	afternoon	Other flies	0	100	2400	0	1938	45156herzogspark	0
2023-08-18	herzogspark	10	Salvia farianacea	afternoon	Butterflies	0	100	2400	0	1938	45156herzogspark	0
2023-08-18	herzogspark	10	Salvia farianacea	afternoon	Wasps	0	100	2400	0	1938	45156herzogspark	0
2023-08-18	herzogspark	10	Salvia farianacea	afternoon	Beetles	0	100	2400	0	1938	45156herzogspark	0
2023-08-18	herzogspark	10	Salvia farianacea	afternoon	True bugs	0	100	2400	0	1938	45156herzogspark	0
2023-08-18	herzogspark	10	Salvia farianacea	afternoon	Ants	0	100	2400	0	1938	45156herzogspark	0
2023-08-18	herzogspark	11	Begonia semperflorens "white"	afternoon	Bumblebees	0	51.8947	1245.47	0	1938	45156herzogspark	0
2023-08-18	herzogspark	11	Begonia semperflorens "white"	afternoon	Honey bees	0	51.8947	1245.47	0	1938	45156herzogspark	0
2023-08-18	herzogspark	11	Begonia semperflorens "white"	afternoon	Wild bees	1	51.8947	1245.47	8.02908	1938	45156herzogspark	0
2023-08-18	herzogspark	11	Begonia semperflorens "white"	afternoon	Hover flies	0	51.8947	1245.47	0	1938	45156herzogspark	0
2023-08-18	herzogspark	11	Begonia semperflorens "white"	afternoon	Other flies	1	51.8947	1245.47	8.02908	1938	45156herzogspark	0
2023-08-18	herzogspark	11	Begonia semperflorens "white"	afternoon	Butterflies	0	51.8947	1245.47	0	1938	45156herzogspark	0
2023-08-18	herzogspark	11	Begonia semperflorens "white"	afternoon	Wasps	0	51.8947	1245.47	0	1938	45156herzogspark	0
2023-08-18	herzogspark	11	Begonia semperflorens "white"	afternoon	Beetles	0	51.8947	1245.47	0	1938	45156herzogspark	0
2023-08-18	herzogspark	11	Begonia semperflorens "white"	afternoon	True bugs	0	51.8947	1245.47	0	1938	45156herzogspark	0
2023-08-18	herzogspark	11	Begonia semperflorens "white"	afternoon	Ants	0	51.8947	1245.47	0	1938	45156herzogspark	0
2023-08-18	herzogspark	12	Salvia splendens "Red"	afternoon	Bumblebees	0	49.9796	1199.51	0	1938	45156herzogspark	0
2023-08-18	herzogspark	12	Salvia splendens "Red"	afternoon	Honey bees	0	49.9796	1199.51	0	1938	45156herzogspark	0
2023-08-18	herzogspark	12	Salvia splendens "Red"	afternoon	Wild bees	0	49.9796	1199.51	0	1938	45156herzogspark	0
2023-08-18	herzogspark	12	Salvia splendens "Red"	afternoon	Hover flies	0	49.9796	1199.51	0	1938	45156herzogspark	0
2023-08-18	herzogspark	12	Salvia splendens "Red"	afternoon	Other flies	0	49.9796	1199.51	0	1938	45156herzogspark	0
2023-08-18	herzogspark	12	Salvia splendens "Red"	afternoon	Butterflies	0	49.9796	1199.51	0	1938	45156herzogspark	0
2023-08-18	herzogspark	12	Salvia splendens "Red"	afternoon	Wasps	0	49.9796	1199.51	0	1938	45156herzogspark	0
2023-08-18	herzogspark	12	Salvia splendens "Red"	afternoon	Beetles	0	49.9796	1199.51	0	1938	45156herzogspark	0
2023-08-18	herzogspark	12	Salvia splendens "Red"	afternoon	True bugs	0	49.9796	1199.51	0	1938	45156herzogspark	0
2023-08-18	herzogspark	12	Salvia splendens "Red"	afternoon	Ants	0	49.9796	1199.51	0	1938	45156herzogspark	0
2023-08-18	herzogspark	13	Salvia splendens "purple"	afternoon	Bumblebees	0	35.0756	841.814	0	1938	45156herzogspark	0
2023-08-18	herzogspark	13	Salvia splendens "purple"	afternoon	Honey bees	0	35.0756	841.814	0	1938	45156herzogspark	0
2023-08-18	herzogspark	13	Salvia splendens "purple"	afternoon	Wild bees	1	35.0756	841.814	11.8791	1938	45156herzogspark	0
2023-08-18	herzogspark	13	Salvia splendens "purple"	afternoon	Hover flies	0	35.0756	841.814	0	1938	45156herzogspark	0
2023-08-18	herzogspark	13	Salvia splendens "purple"	afternoon	Other flies	0	35.0756	841.814	0	1938	45156herzogspark	0
2023-08-18	herzogspark	13	Salvia splendens "purple"	afternoon	Butterflies	0	35.0756	841.814	0	1938	45156herzogspark	0
2023-08-18	herzogspark	13	Salvia splendens "purple"	afternoon	Wasps	0	35.0756	841.814	0	1938	45156herzogspark	0
2023-08-18	herzogspark	13	Salvia splendens "purple"	afternoon	Beetles	0	35.0756	841.814	0	1938	45156herzogspark	0
2023-08-18	herzogspark	13	Salvia splendens "purple"	afternoon	True bugs	0	35.0756	841.814	0	1938	45156herzogspark	0
2023-08-18	herzogspark	13	Salvia splendens "purple"	afternoon	Ants	0	35.0756	841.814	0	1938	45156herzogspark	0
2023-08-18	herzogspark	14	Anemone japonica	afternoon	Bumblebees	0	83.3454	2000.29	0	1938	45156herzogspark	0
2023-08-18	herzogspark	14	Anemone japonica	afternoon	Honey bees	0	83.3454	2000.29	0	1938	45156herzogspark	0
2023-08-18	herzogspark	14	Anemone japonica	afternoon	Wild bees	0	83.3454	2000.29	0	1938	45156herzogspark	0
2023-08-18	herzogspark	14	Anemone japonica	afternoon	Hover flies	0	83.3454	2000.29	0	1938	45156herzogspark	0
2023-08-18	herzogspark	14	Anemone japonica	afternoon	Other flies	0	83.3454	2000.29	0	1938	45156herzogspark	0
2023-08-18	herzogspark	14	Anemone japonica	afternoon	Butterflies	0	83.3454	2000.29	0	1938	45156herzogspark	0
2023-08-18	herzogspark	14	Anemone japonica	afternoon	Wasps	0	83.3454	2000.29	0	1938	45156herzogspark	0
2023-08-18	herzogspark	14	Anemone japonica	afternoon	Beetles	0	83.3454	2000.29	0	1938	45156herzogspark	0
2023-08-18	herzogspark	14	Anemone japonica	afternoon	True bugs	0	83.3454	2000.29	0	1938	45156herzogspark	0
2023-08-18	herzogspark	14	Anemone japonica	afternoon	Ants	0	83.3454	2000.29	0	1938	45156herzogspark	0
2023-08-18	herzogspark	15	Hydrangea macrophylla	afternoon	Bumblebees	0	91.7437	2201.85	0	1938	45156herzogspark	0
2023-08-18	herzogspark	15	Hydrangea macrophylla	afternoon	Honey bees	0	91.7437	2201.85	0	1938	45156herzogspark	0
2023-08-18	herzogspark	15	Hydrangea macrophylla	afternoon	Wild bees	0	91.7437	2201.85	0	1938	45156herzogspark	0
2023-08-18	herzogspark	15	Hydrangea macrophylla	afternoon	Hover flies	0	91.7437	2201.85	0	1938	45156herzogspark	0
2023-08-18	herzogspark	15	Hydrangea macrophylla	afternoon	Other flies	0	91.7437	2201.85	0	1938	45156herzogspark	0
2023-08-18	herzogspark	15	Hydrangea macrophylla	afternoon	Butterflies	0	91.7437	2201.85	0	1938	45156herzogspark	0
2023-08-18	herzogspark	15	Hydrangea macrophylla	afternoon	Wasps	0	91.7437	2201.85	0	1938	45156herzogspark	0
2023-08-18	herzogspark	15	Hydrangea macrophylla	afternoon	Beetles	0	91.7437	2201.85	0	1938	45156herzogspark	0
2023-08-18	herzogspark	15	Hydrangea macrophylla	afternoon	True bugs	0	91.7437	2201.85	0	1938	45156herzogspark	0
2023-08-18	herzogspark	15	Hydrangea macrophylla	afternoon	Ants	0	91.7437	2201.85	0	1938	45156herzogspark	0
2023-08-18	herzogspark	16	Phlox amplifolia	afternoon	Bumblebees	0	87.7536	2106.09	0	1938	45156herzogspark	0
2023-08-18	herzogspark	16	Phlox amplifolia	afternoon	Honey bees	0	87.7536	2106.09	0	1938	45156herzogspark	0
2023-08-18	herzogspark	16	Phlox amplifolia	afternoon	Wild bees	0	87.7536	2106.09	0	1938	45156herzogspark	0
2023-08-18	herzogspark	16	Phlox amplifolia	afternoon	Hover flies	0	87.7536	2106.09	0	1938	45156herzogspark	0
2023-08-18	herzogspark	16	Phlox amplifolia	afternoon	Other flies	0	87.7536	2106.09	0	1938	45156herzogspark	0
2023-08-18	herzogspark	16	Phlox amplifolia	afternoon	Butterflies	0	87.7536	2106.09	0	1938	45156herzogspark	0
2023-08-18	herzogspark	16	Phlox amplifolia	afternoon	Wasps	0	87.7536	2106.09	0	1938	45156herzogspark	0
2023-08-18	herzogspark	16	Phlox amplifolia	afternoon	Beetles	0	87.7536	2106.09	0	1938	45156herzogspark	0
2023-08-18	herzogspark	16	Phlox amplifolia	afternoon	True bugs	0	87.7536	2106.09	0	1938	45156herzogspark	0
2023-08-18	herzogspark	16	Phlox amplifolia	afternoon	Ants	0	87.7536	2106.09	0	1938	45156herzogspark	0
2023-08-18	herzogspark	17	Hibiscus syriacus	afternoon	Bumblebees	0	100	2400	0	1938	45156herzogspark	0
2023-08-18	herzogspark	17	Hibiscus syriacus	afternoon	Honey bees	1	100	2400	4.16667	1938	45156herzogspark	0
2023-08-18	herzogspark	17	Hibiscus syriacus	afternoon	Wild bees	0	100	2400	0	1938	45156herzogspark	0
2023-08-18	herzogspark	17	Hibiscus syriacus	afternoon	Hover flies	0	100	2400	0	1938	45156herzogspark	0
2023-08-18	herzogspark	17	Hibiscus syriacus	afternoon	Other flies	0	100	2400	0	1938	45156herzogspark	0
2023-08-18	herzogspark	17	Hibiscus syriacus	afternoon	Butterflies	0	100	2400	0	1938	45156herzogspark	0
2023-08-18	herzogspark	17	Hibiscus syriacus	afternoon	Wasps	0	100	2400	0	1938	45156herzogspark	0
2023-08-18	herzogspark	17	Hibiscus syriacus	afternoon	Beetles	0	100	2400	0	1938	45156herzogspark	0
2023-08-18	herzogspark	17	Hibiscus syriacus	afternoon	True bugs	0	100	2400	0	1938	45156herzogspark	0
2023-08-18	herzogspark	17	Hibiscus syriacus	afternoon	Ants	0	100	2400	0	1938	45156herzogspark	0
2023-08-18	herzogspark	18	Anemone japonica	afternoon	Bumblebees	0	62.9752	1511.4	0	1938	45156herzogspark	0
2023-08-18	herzogspark	18	Anemone japonica	afternoon	Honey bees	1	62.9752	1511.4	6.61636	1938	45156herzogspark	0
2023-08-18	herzogspark	18	Anemone japonica	afternoon	Wild bees	0	62.9752	1511.4	0	1938	45156herzogspark	0
2023-08-18	herzogspark	18	Anemone japonica	afternoon	Hover flies	0	62.9752	1511.4	0	1938	45156herzogspark	0
2023-08-18	herzogspark	18	Anemone japonica	afternoon	Other flies	0	62.9752	1511.4	0	1938	45156herzogspark	0
2023-08-18	herzogspark	18	Anemone japonica	afternoon	Butterflies	0	62.9752	1511.4	0	1938	45156herzogspark	0
2023-08-18	herzogspark	18	Anemone japonica	afternoon	Wasps	0	62.9752	1511.4	0	1938	45156herzogspark	0
2023-08-18	herzogspark	18	Anemone japonica	afternoon	Beetles	0	62.9752	1511.4	0	1938	45156herzogspark	0
2023-08-18	herzogspark	18	Anemone japonica	afternoon	True bugs	0	62.9752	1511.4	0	1938	45156herzogspark	0
2023-08-18	herzogspark	18	Anemone japonica	afternoon	Ants	0	62.9752	1511.4	0	1938	45156herzogspark	0
2023-08-18	neupfarrplatz	19	Canna indica	afternoon	Bumblebees	0	100	2400	0	24	45156neupfarrplatz	1
2023-08-18	neupfarrplatz	19	Canna indica	afternoon	Honey bees	0	100	2400	0	24	45156neupfarrplatz	0
2023-08-18	neupfarrplatz	19	Canna indica	afternoon	Wild bees	0	100	2400	0	24	45156neupfarrplatz	0
2023-08-18	neupfarrplatz	19	Canna indica	afternoon	Hover flies	0	100	2400	0	24	45156neupfarrplatz	0
2023-08-18	neupfarrplatz	19	Canna indica	afternoon	Other flies	0	100	2400	0	24	45156neupfarrplatz	0
2023-08-18	neupfarrplatz	19	Canna indica	afternoon	Butterflies	0	100	2400	0	24	45156neupfarrplatz	0
2023-08-18	neupfarrplatz	19	Canna indica	afternoon	Wasps	0	100	2400	0	24	45156neupfarrplatz	0
2023-08-18	neupfarrplatz	19	Canna indica	afternoon	Beetles	0	100	2400	0	24	45156neupfarrplatz	0
2023-08-18	neupfarrplatz	19	Canna indica	afternoon	True bugs	0	100	2400	0	24	45156neupfarrplatz	0
2023-08-18	neupfarrplatz	19	Canna indica	afternoon	Ants	0	100	2400	0	24	45156neupfarrplatz	0
2023-08-18	neupfarrplatz	20	Petunia cultivars "Queen of Hearts"	afternoon	Bumblebees	0	65.9963	1583.91	0	24	45156neupfarrplatz	0
2023-08-18	neupfarrplatz	20	Petunia cultivars "Queen of Hearts"	afternoon	Honey bees	0	65.9963	1583.91	0	24	45156neupfarrplatz	0
2023-08-18	neupfarrplatz	20	Petunia cultivars "Queen of Hearts"	afternoon	Wild bees	0	65.9963	1583.91	0	24	45156neupfarrplatz	0
2023-08-18	neupfarrplatz	20	Petunia cultivars "Queen of Hearts"	afternoon	Hover flies	0	65.9963	1583.91	0	24	45156neupfarrplatz	0
2023-08-18	neupfarrplatz	20	Petunia cultivars "Queen of Hearts"	afternoon	Other flies	0	65.9963	1583.91	0	24	45156neupfarrplatz	0
2023-08-18	neupfarrplatz	20	Petunia cultivars "Queen of Hearts"	afternoon	Butterflies	0	65.9963	1583.91	0	24	45156neupfarrplatz	0
2023-08-18	neupfarrplatz	20	Petunia cultivars "Queen of Hearts"	afternoon	Wasps	0	65.9963	1583.91	0	24	45156neupfarrplatz	0
2023-08-18	neupfarrplatz	20	Petunia cultivars "Queen of Hearts"	afternoon	Beetles	0	65.9963	1583.91	0	24	45156neupfarrplatz	0
2023-08-18	neupfarrplatz	20	Petunia cultivars "Queen of Hearts"	afternoon	True bugs	0	65.9963	1583.91	0	24	45156neupfarrplatz	0
2023-08-18	neupfarrplatz	20	Petunia cultivars "Queen of Hearts"	afternoon	Ants	0	65.9963	1583.91	0	24	45156neupfarrplatz	0
2023-08-18	neupfarrplatz	21	Petunia cultivars "Nightsky"	afternoon	Bumblebees	0	61.4989	1475.97	0	24	45156neupfarrplatz	0
2023-08-18	neupfarrplatz	21	Petunia cultivars "Nightsky"	afternoon	Honey bees	0	61.4989	1475.97	0	24	45156neupfarrplatz	0
2023-08-18	neupfarrplatz	21	Petunia cultivars "Nightsky"	afternoon	Wild bees	0	61.4989	1475.97	0	24	45156neupfarrplatz	0
2023-08-18	neupfarrplatz	21	Petunia cultivars "Nightsky"	afternoon	Hover flies	0	61.4989	1475.97	0	24	45156neupfarrplatz	0
2023-08-18	neupfarrplatz	21	Petunia cultivars "Nightsky"	afternoon	Other flies	0	61.4989	1475.97	0	24	45156neupfarrplatz	0
2023-08-18	neupfarrplatz	21	Petunia cultivars "Nightsky"	afternoon	Butterflies	0	61.4989	1475.97	0	24	45156neupfarrplatz	0
2023-08-18	neupfarrplatz	21	Petunia cultivars "Nightsky"	afternoon	Wasps	0	61.4989	1475.97	0	24	45156neupfarrplatz	0
2023-08-18	neupfarrplatz	21	Petunia cultivars "Nightsky"	afternoon	Beetles	0	61.4989	1475.97	0	24	45156neupfarrplatz	0
2023-08-18	neupfarrplatz	21	Petunia cultivars "Nightsky"	afternoon	True bugs	0	61.4989	1475.97	0	24	45156neupfarrplatz	0
2023-08-18	neupfarrplatz	21	Petunia cultivars "Nightsky"	afternoon	Ants	0	61.4989	1475.97	0	24	45156neupfarrplatz	0
2023-08-18	neupfarrplatz	22	Salvia farianacea	afternoon	Bumblebees	0	100	2400	0	24	45156neupfarrplatz	0
2023-08-18	neupfarrplatz	22	Salvia farianacea	afternoon	Honey bees	2	100	2400	8.33333	24	45156neupfarrplatz	0
2023-08-18	neupfarrplatz	22	Salvia farianacea	afternoon	Wild bees	1	100	2400	4.16667	24	45156neupfarrplatz	0
2023-08-18	neupfarrplatz	22	Salvia farianacea	afternoon	Hover flies	0	100	2400	0	24	45156neupfarrplatz	0
2023-08-18	neupfarrplatz	22	Salvia farianacea	afternoon	Other flies	0	100	2400	0	24	45156neupfarrplatz	0
2023-08-18	neupfarrplatz	22	Salvia farianacea	afternoon	Butterflies	0	100	2400	0	24	45156neupfarrplatz	0
2023-08-18	neupfarrplatz	22	Salvia farianacea	afternoon	Wasps	0	100	2400	0	24	45156neupfarrplatz	0
2023-08-18	neupfarrplatz	22	Salvia farianacea	afternoon	Beetles	0	100	2400	0	24	45156neupfarrplatz	0
2023-08-18	neupfarrplatz	22	Salvia farianacea	afternoon	True bugs	0	100	2400	0	24	45156neupfarrplatz	0
2023-08-18	neupfarrplatz	22	Salvia farianacea	afternoon	Ants	0	100	2400	0	24	45156neupfarrplatz	0
2023-08-18	neupfarrplatz	23	Cleome spinosa	afternoon	Bumblebees	0	88.7689	2130.45	0	24	45156neupfarrplatz	0
2023-08-18	neupfarrplatz	23	Cleome spinosa	afternoon	Honey bees	0	88.7689	2130.45	0	24	45156neupfarrplatz	0
2023-08-18	neupfarrplatz	23	Cleome spinosa	afternoon	Wild bees	0	88.7689	2130.45	0	24	45156neupfarrplatz	0
2023-08-18	neupfarrplatz	23	Cleome spinosa	afternoon	Hover flies	0	88.7689	2130.45	0	24	45156neupfarrplatz	0
2023-08-18	neupfarrplatz	23	Cleome spinosa	afternoon	Other flies	0	88.7689	2130.45	0	24	45156neupfarrplatz	0
2023-08-18	neupfarrplatz	23	Cleome spinosa	afternoon	Butterflies	0	88.7689	2130.45	0	24	45156neupfarrplatz	0
2023-08-18	neupfarrplatz	23	Cleome spinosa	afternoon	Wasps	0	88.7689	2130.45	0	24	45156neupfarrplatz	0
2023-08-18	neupfarrplatz	23	Cleome spinosa	afternoon	Beetles	0	88.7689	2130.45	0	24	45156neupfarrplatz	0
2023-08-18	neupfarrplatz	23	Cleome spinosa	afternoon	True bugs	0	88.7689	2130.45	0	24	45156neupfarrplatz	0
2023-08-18	neupfarrplatz	23	Cleome spinosa	afternoon	Ants	0	88.7689	2130.45	0	24	45156neupfarrplatz	0
2023-08-18	neupfarrplatz	24	Petunia cultivars "Nightsky"	afternoon	Bumblebees	0	69.2972	1663.13	0	24	45156neupfarrplatz	0
2023-08-18	neupfarrplatz	24	Petunia cultivars "Nightsky"	afternoon	Honey bees	0	69.2972	1663.13	0	24	45156neupfarrplatz	0
2023-08-18	neupfarrplatz	24	Petunia cultivars "Nightsky"	afternoon	Wild bees	0	69.2972	1663.13	0	24	45156neupfarrplatz	0
2023-08-18	neupfarrplatz	24	Petunia cultivars "Nightsky"	afternoon	Hover flies	0	69.2972	1663.13	0	24	45156neupfarrplatz	0
2023-08-18	neupfarrplatz	24	Petunia cultivars "Nightsky"	afternoon	Other flies	1	69.2972	1663.13	6.01275	24	45156neupfarrplatz	0
2023-08-18	neupfarrplatz	24	Petunia cultivars "Nightsky"	afternoon	Butterflies	0	69.2972	1663.13	0	24	45156neupfarrplatz	0
2023-08-18	neupfarrplatz	24	Petunia cultivars "Nightsky"	afternoon	Wasps	0	69.2972	1663.13	0	24	45156neupfarrplatz	0
2023-08-18	neupfarrplatz	24	Petunia cultivars "Nightsky"	afternoon	Beetles	0	69.2972	1663.13	0	24	45156neupfarrplatz	0
2023-08-18	neupfarrplatz	24	Petunia cultivars "Nightsky"	afternoon	True bugs	0	69.2972	1663.13	0	24	45156neupfarrplatz	0
2023-08-18	neupfarrplatz	24	Petunia cultivars "Nightsky"	afternoon	Ants	0	69.2972	1663.13	0	24	45156neupfarrplatz	0
2023-08-18	neupfarrplatz	25	Petunia cultivars "Queen of Hearts"	afternoon	Bumblebees	0	82.9557	1990.94	0	24	45156neupfarrplatz	0
2023-08-18	neupfarrplatz	25	Petunia cultivars "Queen of Hearts"	afternoon	Honey bees	1	82.9557	1990.94	5.02276	24	45156neupfarrplatz	0
2023-08-18	neupfarrplatz	25	Petunia cultivars "Queen of Hearts"	afternoon	Wild bees	0	82.9557	1990.94	0	24	45156neupfarrplatz	0
2023-08-18	neupfarrplatz	25	Petunia cultivars "Queen of Hearts"	afternoon	Hover flies	0	82.9557	1990.94	0	24	45156neupfarrplatz	0
2023-08-18	neupfarrplatz	25	Petunia cultivars "Queen of Hearts"	afternoon	Other flies	0	82.9557	1990.94	0	24	45156neupfarrplatz	0
2023-08-18	neupfarrplatz	25	Petunia cultivars "Queen of Hearts"	afternoon	Butterflies	0	82.9557	1990.94	0	24	45156neupfarrplatz	0
2023-08-18	neupfarrplatz	25	Petunia cultivars "Queen of Hearts"	afternoon	Wasps	0	82.9557	1990.94	0	24	45156neupfarrplatz	0
2023-08-18	neupfarrplatz	25	Petunia cultivars "Queen of Hearts"	afternoon	Beetles	0	82.9557	1990.94	0	24	45156neupfarrplatz	0
2023-08-18	neupfarrplatz	25	Petunia cultivars "Queen of Hearts"	afternoon	True bugs	0	82.9557	1990.94	0	24	45156neupfarrplatz	0
2023-08-18	neupfarrplatz	25	Petunia cultivars "Queen of Hearts"	afternoon	Ants	0	82.9557	1990.94	0	24	45156neupfarrplatz	0
2023-08-18	stobäusplatz	26	Begonia semperflorens "Eureka Scarlet"	afternoon	Bumblebees	0	53.9417	1294.6	0	128	45156stobäusplatz	1
2023-08-18	stobäusplatz	26	Begonia semperflorens "Eureka Scarlet"	afternoon	Honey bees	0	53.9417	1294.6	0	128	45156stobäusplatz	0
2023-08-18	stobäusplatz	26	Begonia semperflorens "Eureka Scarlet"	afternoon	Wild bees	0	53.9417	1294.6	0	128	45156stobäusplatz	0
2023-08-18	stobäusplatz	26	Begonia semperflorens "Eureka Scarlet"	afternoon	Hover flies	0	53.9417	1294.6	0	128	45156stobäusplatz	0
2023-08-18	stobäusplatz	26	Begonia semperflorens "Eureka Scarlet"	afternoon	Other flies	0	53.9417	1294.6	0	128	45156stobäusplatz	0
2023-08-18	stobäusplatz	26	Begonia semperflorens "Eureka Scarlet"	afternoon	Butterflies	0	53.9417	1294.6	0	128	45156stobäusplatz	0
2023-08-18	stobäusplatz	26	Begonia semperflorens "Eureka Scarlet"	afternoon	Wasps	0	53.9417	1294.6	0	128	45156stobäusplatz	0
2023-08-18	stobäusplatz	26	Begonia semperflorens "Eureka Scarlet"	afternoon	Beetles	0	53.9417	1294.6	0	128	45156stobäusplatz	0
2023-08-18	stobäusplatz	26	Begonia semperflorens "Eureka Scarlet"	afternoon	True bugs	0	53.9417	1294.6	0	128	45156stobäusplatz	0
2023-08-18	stobäusplatz	26	Begonia semperflorens "Eureka Scarlet"	afternoon	Ants	0	53.9417	1294.6	0	128	45156stobäusplatz	0
2023-08-18	stobäusplatz	27	Cleome spinosa	afternoon	Bumblebees	0	100	2400	0	128	45156stobäusplatz	0
2023-08-18	stobäusplatz	27	Cleome spinosa	afternoon	Honey bees	0	100	2400	0	128	45156stobäusplatz	0
2023-08-18	stobäusplatz	27	Cleome spinosa	afternoon	Wild bees	0	100	2400	0	128	45156stobäusplatz	0
2023-08-18	stobäusplatz	27	Cleome spinosa	afternoon	Hover flies	0	100	2400	0	128	45156stobäusplatz	0
2023-08-18	stobäusplatz	27	Cleome spinosa	afternoon	Other flies	0	100	2400	0	128	45156stobäusplatz	0
2023-08-18	stobäusplatz	27	Cleome spinosa	afternoon	Butterflies	0	100	2400	0	128	45156stobäusplatz	0
2023-08-18	stobäusplatz	27	Cleome spinosa	afternoon	Wasps	0	100	2400	0	128	45156stobäusplatz	0
2023-08-18	stobäusplatz	27	Cleome spinosa	afternoon	Beetles	0	100	2400	0	128	45156stobäusplatz	0
2023-08-18	stobäusplatz	27	Cleome spinosa	afternoon	True bugs	0	100	2400	0	128	45156stobäusplatz	0
2023-08-18	stobäusplatz	27	Cleome spinosa	afternoon	Ants	0	100	2400	0	128	45156stobäusplatz	0
2023-08-18	stobäusplatz	28	Salvia farianacea	afternoon	Bumblebees	0	60.1465	1443.52	0	128	45156stobäusplatz	0
2023-08-18	stobäusplatz	28	Salvia farianacea	afternoon	Honey bees	0	60.1465	1443.52	0	128	45156stobäusplatz	0
2023-08-18	stobäusplatz	28	Salvia farianacea	afternoon	Wild bees	0	60.1465	1443.52	0	128	45156stobäusplatz	0
2023-08-18	stobäusplatz	28	Salvia farianacea	afternoon	Hover flies	0	60.1465	1443.52	0	128	45156stobäusplatz	0
2023-08-18	stobäusplatz	28	Salvia farianacea	afternoon	Other flies	0	60.1465	1443.52	0	128	45156stobäusplatz	0
2023-08-18	stobäusplatz	28	Salvia farianacea	afternoon	Butterflies	0	60.1465	1443.52	0	128	45156stobäusplatz	0
2023-08-18	stobäusplatz	28	Salvia farianacea	afternoon	Wasps	0	60.1465	1443.52	0	128	45156stobäusplatz	0
2023-08-18	stobäusplatz	28	Salvia farianacea	afternoon	Beetles	0	60.1465	1443.52	0	128	45156stobäusplatz	0
2023-08-18	stobäusplatz	28	Salvia farianacea	afternoon	True bugs	0	60.1465	1443.52	0	128	45156stobäusplatz	0
2023-08-18	stobäusplatz	28	Salvia farianacea	afternoon	Ants	0	60.1465	1443.52	0	128	45156stobäusplatz	0
2023-08-18	stobäusplatz	29	Salvia splendens "Red"	afternoon	Bumblebees	0	83.8195	2011.67	0	128	45156stobäusplatz	0
2023-08-18	stobäusplatz	29	Salvia splendens "Red"	afternoon	Honey bees	0	83.8195	2011.67	0	128	45156stobäusplatz	0
2023-08-18	stobäusplatz	29	Salvia splendens "Red"	afternoon	Wild bees	0	83.8195	2011.67	0	128	45156stobäusplatz	0
2023-08-18	stobäusplatz	29	Salvia splendens "Red"	afternoon	Hover flies	0	83.8195	2011.67	0	128	45156stobäusplatz	0
2023-08-18	stobäusplatz	29	Salvia splendens "Red"	afternoon	Other flies	0	83.8195	2011.67	0	128	45156stobäusplatz	0
2023-08-18	stobäusplatz	29	Salvia splendens "Red"	afternoon	Butterflies	0	83.8195	2011.67	0	128	45156stobäusplatz	0
2023-08-18	stobäusplatz	29	Salvia splendens "Red"	afternoon	Wasps	0	83.8195	2011.67	0	128	45156stobäusplatz	0
2023-08-18	stobäusplatz	29	Salvia splendens "Red"	afternoon	Beetles	0	83.8195	2011.67	0	128	45156stobäusplatz	0
2023-08-18	stobäusplatz	29	Salvia splendens "Red"	afternoon	True bugs	0	83.8195	2011.67	0	128	45156stobäusplatz	0
2023-08-18	stobäusplatz	29	Salvia splendens "Red"	afternoon	Ants	2	83.8195	2011.67	9.942	128	45156stobäusplatz	0
2023-08-18	plz	30	Salvia farianacea	afternoon	Bumblebees	0	82.6252	1983	0	10	45156plz	1
2023-08-18	plz	30	Salvia farianacea	afternoon	Honey bees	0	82.6252	1983	0	10	45156plz	0
2023-08-18	plz	30	Salvia farianacea	afternoon	Wild bees	1	82.6252	1983	5.04285	10	45156plz	0
2023-08-18	plz	30	Salvia farianacea	afternoon	Hover flies	0	82.6252	1983	0	10	45156plz	0
2023-08-18	plz	30	Salvia farianacea	afternoon	Other flies	1	82.6252	1983	5.04285	10	45156plz	0
2023-08-18	plz	30	Salvia farianacea	afternoon	Butterflies	0	82.6252	1983	0	10	45156plz	0
2023-08-18	plz	30	Salvia farianacea	afternoon	Wasps	0	82.6252	1983	0	10	45156plz	0
2023-08-18	plz	30	Salvia farianacea	afternoon	Beetles	0	82.6252	1983	0	10	45156plz	0
2023-08-18	plz	30	Salvia farianacea	afternoon	True bugs	1	82.6252	1983	5.04285	10	45156plz	0
2023-08-18	plz	30	Salvia farianacea	afternoon	Ants	0	82.6252	1983	0	10	45156plz	0
2023-08-18	plz	31	Tagetes patula "orange"	afternoon	Bumblebees	0	31.0585	745.404	0	10	45156plz	0
2023-08-18	plz	31	Tagetes patula "orange"	afternoon	Honey bees	0	31.0585	745.404	0	10	45156plz	0
2023-08-18	plz	31	Tagetes patula "orange"	afternoon	Wild bees	0	31.0585	745.404	0	10	45156plz	0
2023-08-18	plz	31	Tagetes patula "orange"	afternoon	Hover flies	0	31.0585	745.404	0	10	45156plz	0
2023-08-18	plz	31	Tagetes patula "orange"	afternoon	Other flies	0	31.0585	745.404	0	10	45156plz	0
2023-08-18	plz	31	Tagetes patula "orange"	afternoon	Butterflies	0	31.0585	745.404	0	10	45156plz	0
2023-08-18	plz	31	Tagetes patula "orange"	afternoon	Wasps	0	31.0585	745.404	0	10	45156plz	0
2023-08-18	plz	31	Tagetes patula "orange"	afternoon	Beetles	0	31.0585	745.404	0	10	45156plz	0
2023-08-18	plz	31	Tagetes patula "orange"	afternoon	True bugs	0	31.0585	745.404	0	10	45156plz	0
2023-08-18	plz	31	Tagetes patula "orange"	afternoon	Ants	0	31.0585	745.404	0	10	45156plz	0
2023-08-18	oth	32	Salvia yangii	afternoon	Bumblebees	0	72.5386	1740.93	0	324	45156oth	1
2023-08-18	oth	32	Salvia yangii	afternoon	Honey bees	0	72.5386	1740.93	0	324	45156oth	0
2023-08-18	oth	32	Salvia yangii	afternoon	Wild bees	0	72.5386	1740.93	0	324	45156oth	0
2023-08-18	oth	32	Salvia yangii	afternoon	Hover flies	1	72.5386	1740.93	5.74407	324	45156oth	0
2023-08-18	oth	32	Salvia yangii	afternoon	Other flies	0	72.5386	1740.93	0	324	45156oth	0
2023-08-18	oth	32	Salvia yangii	afternoon	Butterflies	0	72.5386	1740.93	0	324	45156oth	0
2023-08-18	oth	32	Salvia yangii	afternoon	Wasps	0	72.5386	1740.93	0	324	45156oth	0
2023-08-18	oth	32	Salvia yangii	afternoon	Beetles	0	72.5386	1740.93	0	324	45156oth	0
2023-08-18	oth	32	Salvia yangii	afternoon	True bugs	0	72.5386	1740.93	0	324	45156oth	0
2023-08-18	oth	32	Salvia yangii	afternoon	Ants	0	72.5386	1740.93	0	324	45156oth	0
2023-08-18	oth	33	Eryngium planum "Flachblatt-Mannstreu"	afternoon	Bumblebees	0	40.5215	972.516	0	324	45156oth	0
2023-08-18	oth	33	Eryngium planum "Flachblatt-Mannstreu"	afternoon	Honey bees	0	40.5215	972.516	0	324	45156oth	0
2023-08-18	oth	33	Eryngium planum "Flachblatt-Mannstreu"	afternoon	Wild bees	0	40.5215	972.516	0	324	45156oth	0
2023-08-18	oth	33	Eryngium planum "Flachblatt-Mannstreu"	afternoon	Hover flies	0	40.5215	972.516	0	324	45156oth	0
2023-08-18	oth	33	Eryngium planum "Flachblatt-Mannstreu"	afternoon	Other flies	0	40.5215	972.516	0	324	45156oth	0
2023-08-18	oth	33	Eryngium planum "Flachblatt-Mannstreu"	afternoon	Butterflies	0	40.5215	972.516	0	324	45156oth	0
2023-08-18	oth	33	Eryngium planum "Flachblatt-Mannstreu"	afternoon	Wasps	0	40.5215	972.516	0	324	45156oth	0
2023-08-18	oth	33	Eryngium planum "Flachblatt-Mannstreu"	afternoon	Beetles	0	40.5215	972.516	0	324	45156oth	0
2023-08-18	oth	33	Eryngium planum "Flachblatt-Mannstreu"	afternoon	True bugs	0	40.5215	972.516	0	324	45156oth	0
2023-08-18	oth	33	Eryngium planum "Flachblatt-Mannstreu"	afternoon	Ants	0	40.5215	972.516	0	324	45156oth	0
2023-08-21	kunstgalerie	1	Begonia semperflorens "Eureka White"	morning	Bumblebees	0	100	2400	0	120	45159kunstgalerie	1
2023-08-21	kunstgalerie	1	Begonia semperflorens "Eureka White"	morning	Honey bees	0	100	2400	0	120	45159kunstgalerie	0
2023-08-21	kunstgalerie	1	Begonia semperflorens "Eureka White"	morning	Wild bees	0	100	2400	0	120	45159kunstgalerie	0
2023-08-21	kunstgalerie	1	Begonia semperflorens "Eureka White"	morning	Hover flies	0	100	2400	0	120	45159kunstgalerie	0
2023-08-21	kunstgalerie	1	Begonia semperflorens "Eureka White"	morning	Other flies	0	100	2400	0	120	45159kunstgalerie	0
2023-08-21	kunstgalerie	1	Begonia semperflorens "Eureka White"	morning	Butterflies	0	100	2400	0	120	45159kunstgalerie	0
2023-08-21	kunstgalerie	1	Begonia semperflorens "Eureka White"	morning	Wasps	0	100	2400	0	120	45159kunstgalerie	0
2023-08-21	kunstgalerie	1	Begonia semperflorens "Eureka White"	morning	Beetles	0	100	2400	0	120	45159kunstgalerie	0
2023-08-21	kunstgalerie	1	Begonia semperflorens "Eureka White"	morning	True bugs	0	100	2400	0	120	45159kunstgalerie	0
2023-08-21	kunstgalerie	1	Begonia semperflorens "Eureka White"	morning	Ants	0	100	2400	0	120	45159kunstgalerie	0
2023-08-21	kunstgalerie	2	Cleome spinosa	morning	Bumblebees	0	100	2400	0	120	45159kunstgalerie	0
2023-08-21	kunstgalerie	2	Cleome spinosa	morning	Honey bees	0	100	2400	0	120	45159kunstgalerie	0
2023-08-21	kunstgalerie	2	Cleome spinosa	morning	Wild bees	0	100	2400	0	120	45159kunstgalerie	0
2023-08-21	kunstgalerie	2	Cleome spinosa	morning	Hover flies	0	100	2400	0	120	45159kunstgalerie	0
2023-08-21	kunstgalerie	2	Cleome spinosa	morning	Other flies	0	100	2400	0	120	45159kunstgalerie	0
2023-08-21	kunstgalerie	2	Cleome spinosa	morning	Butterflies	0	100	2400	0	120	45159kunstgalerie	0
2023-08-21	kunstgalerie	2	Cleome spinosa	morning	Wasps	0	100	2400	0	120	45159kunstgalerie	0
2023-08-21	kunstgalerie	2	Cleome spinosa	morning	Beetles	0	100	2400	0	120	45159kunstgalerie	0
2023-08-21	kunstgalerie	2	Cleome spinosa	morning	True bugs	0	100	2400	0	120	45159kunstgalerie	0
2023-08-21	kunstgalerie	2	Cleome spinosa	morning	Ants	0	100	2400	0	120	45159kunstgalerie	0
2023-08-21	kunstgalerie	3	Salvia farianacea	morning	Bumblebees	0	100	2400	0	120	45159kunstgalerie	0
2023-08-21	kunstgalerie	3	Salvia farianacea	morning	Honey bees	0	100	2400	0	120	45159kunstgalerie	0
2023-08-21	kunstgalerie	3	Salvia farianacea	morning	Wild bees	0	100	2400	0	120	45159kunstgalerie	0
2023-08-21	kunstgalerie	3	Salvia farianacea	morning	Hover flies	1	100	2400	4.16667	120	45159kunstgalerie	0
2023-08-21	kunstgalerie	3	Salvia farianacea	morning	Other flies	0	100	2400	0	120	45159kunstgalerie	0
2023-08-21	kunstgalerie	3	Salvia farianacea	morning	Butterflies	0	100	2400	0	120	45159kunstgalerie	0
2023-08-21	kunstgalerie	3	Salvia farianacea	morning	Wasps	0	100	2400	0	120	45159kunstgalerie	0
2023-08-21	kunstgalerie	3	Salvia farianacea	morning	Beetles	0	100	2400	0	120	45159kunstgalerie	0
2023-08-21	kunstgalerie	3	Salvia farianacea	morning	True bugs	0	100	2400	0	120	45159kunstgalerie	0
2023-08-21	kunstgalerie	3	Salvia farianacea	morning	Ants	0	100	2400	0	120	45159kunstgalerie	0
2023-08-21	kunstgalerie	4	Tagetes patula "orange"	morning	Bumblebees	0	46.6808	1120.34	0	120	45159kunstgalerie	0
2023-08-21	kunstgalerie	4	Tagetes patula "orange"	morning	Honey bees	0	46.6808	1120.34	0	120	45159kunstgalerie	0
2023-08-21	kunstgalerie	4	Tagetes patula "orange"	morning	Wild bees	0	46.6808	1120.34	0	120	45159kunstgalerie	0
2023-08-21	kunstgalerie	4	Tagetes patula "orange"	morning	Hover flies	0	46.6808	1120.34	0	120	45159kunstgalerie	0
2023-08-21	kunstgalerie	4	Tagetes patula "orange"	morning	Other flies	0	46.6808	1120.34	0	120	45159kunstgalerie	0
2023-08-21	kunstgalerie	4	Tagetes patula "orange"	morning	Butterflies	0	46.6808	1120.34	0	120	45159kunstgalerie	0
2023-08-21	kunstgalerie	4	Tagetes patula "orange"	morning	Wasps	0	46.6808	1120.34	0	120	45159kunstgalerie	0
2023-08-21	kunstgalerie	4	Tagetes patula "orange"	morning	Beetles	0	46.6808	1120.34	0	120	45159kunstgalerie	0
2023-08-21	kunstgalerie	4	Tagetes patula "orange"	morning	True bugs	0	46.6808	1120.34	0	120	45159kunstgalerie	0
2023-08-21	kunstgalerie	4	Tagetes patula "orange"	morning	Ants	0	46.6808	1120.34	0	120	45159kunstgalerie	0
2023-08-21	kunstgalerie	5	Canna indica	morning	Bumblebees	0	100	2400	0	120	45159kunstgalerie	0
2023-08-21	kunstgalerie	5	Canna indica	morning	Honey bees	0	100	2400	0	120	45159kunstgalerie	0
2023-08-21	kunstgalerie	5	Canna indica	morning	Wild bees	0	100	2400	0	120	45159kunstgalerie	0
2023-08-21	kunstgalerie	5	Canna indica	morning	Hover flies	0	100	2400	0	120	45159kunstgalerie	0
2023-08-21	kunstgalerie	5	Canna indica	morning	Other flies	0	100	2400	0	120	45159kunstgalerie	0
2023-08-21	kunstgalerie	5	Canna indica	morning	Butterflies	0	100	2400	0	120	45159kunstgalerie	0
2023-08-21	kunstgalerie	5	Canna indica	morning	Wasps	0	100	2400	0	120	45159kunstgalerie	0
2023-08-21	kunstgalerie	5	Canna indica	morning	Beetles	0	100	2400	0	120	45159kunstgalerie	0
2023-08-21	kunstgalerie	5	Canna indica	morning	True bugs	0	100	2400	0	120	45159kunstgalerie	0
2023-08-21	kunstgalerie	5	Canna indica	morning	Ants	0	100	2400	0	120	45159kunstgalerie	0
2023-08-21	kunstgalerie	6	Salvia splendens "Red"	morning	Bumblebees	0	44.1165	1058.8	0	120	45159kunstgalerie	0
2023-08-21	kunstgalerie	6	Salvia splendens "Red"	morning	Honey bees	0	44.1165	1058.8	0	120	45159kunstgalerie	0
2023-08-21	kunstgalerie	6	Salvia splendens "Red"	morning	Wild bees	0	44.1165	1058.8	0	120	45159kunstgalerie	0
2023-08-21	kunstgalerie	6	Salvia splendens "Red"	morning	Hover flies	0	44.1165	1058.8	0	120	45159kunstgalerie	0
2023-08-21	kunstgalerie	6	Salvia splendens "Red"	morning	Other flies	0	44.1165	1058.8	0	120	45159kunstgalerie	0
2023-08-21	kunstgalerie	6	Salvia splendens "Red"	morning	Butterflies	0	44.1165	1058.8	0	120	45159kunstgalerie	0
2023-08-21	kunstgalerie	6	Salvia splendens "Red"	morning	Wasps	0	44.1165	1058.8	0	120	45159kunstgalerie	0
2023-08-21	kunstgalerie	6	Salvia splendens "Red"	morning	Beetles	0	44.1165	1058.8	0	120	45159kunstgalerie	0
2023-08-21	kunstgalerie	6	Salvia splendens "Red"	morning	True bugs	0	44.1165	1058.8	0	120	45159kunstgalerie	0
2023-08-21	kunstgalerie	6	Salvia splendens "Red"	morning	Ants	0	44.1165	1058.8	0	120	45159kunstgalerie	0
2023-08-21	kunstgalerie	7	Salvia splendens "purple"	morning	Bumblebees	0	54.0392	1296.94	0	120	45159kunstgalerie	0
2023-08-21	kunstgalerie	7	Salvia splendens "purple"	morning	Honey bees	0	54.0392	1296.94	0	120	45159kunstgalerie	0
2023-08-21	kunstgalerie	7	Salvia splendens "purple"	morning	Wild bees	0	54.0392	1296.94	0	120	45159kunstgalerie	0
2023-08-21	kunstgalerie	7	Salvia splendens "purple"	morning	Hover flies	0	54.0392	1296.94	0	120	45159kunstgalerie	0
2023-08-21	kunstgalerie	7	Salvia splendens "purple"	morning	Other flies	0	54.0392	1296.94	0	120	45159kunstgalerie	0
2023-08-21	kunstgalerie	7	Salvia splendens "purple"	morning	Butterflies	0	54.0392	1296.94	0	120	45159kunstgalerie	0
2023-08-21	kunstgalerie	7	Salvia splendens "purple"	morning	Wasps	0	54.0392	1296.94	0	120	45159kunstgalerie	0
2023-08-21	kunstgalerie	7	Salvia splendens "purple"	morning	Beetles	0	54.0392	1296.94	0	120	45159kunstgalerie	0
2023-08-21	kunstgalerie	7	Salvia splendens "purple"	morning	True bugs	0	54.0392	1296.94	0	120	45159kunstgalerie	0
2023-08-21	kunstgalerie	7	Salvia splendens "purple"	morning	Ants	0	54.0392	1296.94	0	120	45159kunstgalerie	0
2023-08-21	stadtpark	8	Geranium x magnificum	morning	Bumblebees	0	94.151	2259.62	0	1288
2023-08-21	stadtpark	8	Geranium x magnificum	morning	Honey bees	1	94.151	2259.62	4.42551	1288	45159stadtpark	1
2023-08-21	stadtpark	8	Geranium x magnificum	morning	Wild bees	1	94.151	2259.62	4.42551	1288	45159stadtpark	0
2023-08-21	stadtpark	8	Geranium x magnificum	morning	Hover flies	0	94.151	2259.62	0	1288	45159stadtpark	0
2023-08-21	stadtpark	8	Geranium x magnificum	morning	Other flies	0	94.151	2259.62	0	1288	45159stadtpark	0
2023-08-21	stadtpark	8	Geranium x magnificum	morning	Butterflies	0	94.151	2259.62	0	1288	45159stadtpark	0
2023-08-21	stadtpark	8	Geranium x magnificum	morning	Wasps	0	94.151	2259.62	0	1288	45159stadtpark	0
2023-08-21	stadtpark	8	Geranium x magnificum	morning	Beetles	0	94.151	2259.62	0	1288	45159stadtpark	0
2023-08-21	stadtpark	8	Geranium x magnificum	morning	True bugs	0	94.151	2259.62	0	1288	45159stadtpark	0
2023-08-21	stadtpark	8	Geranium x magnificum	morning	Ants	0	94.151	2259.62	0	1288	45159stadtpark	0
2023-08-21	stadtpark	9	Geranium x magnificum	morning	Bumblebees	0	100	2400	0	1288	45159stadtpark	0
2023-08-21	stadtpark	9	Geranium x magnificum	morning	Honey bees	2	100	2400	8.33333	1288	45159stadtpark	0
2023-08-21	stadtpark	9	Geranium x magnificum	morning	Wild bees	0	100	2400	0	1288	45159stadtpark	0
2023-08-21	stadtpark	9	Geranium x magnificum	morning	Hover flies	0	100	2400	0	1288	45159stadtpark	0
2023-08-21	stadtpark	9	Geranium x magnificum	morning	Other flies	0	100	2400	0	1288	45159stadtpark	0
2023-08-21	stadtpark	9	Geranium x magnificum	morning	Butterflies	0	100	2400	0	1288	45159stadtpark	0
2023-08-21	stadtpark	9	Geranium x magnificum	morning	Wasps	0	100	2400	0	1288	45159stadtpark	0
2023-08-21	stadtpark	9	Geranium x magnificum	morning	Beetles	0	100	2400	0	1288	45159stadtpark	0
2023-08-21	stadtpark	9	Geranium x magnificum	morning	True bugs	0	100	2400	0	1288	45159stadtpark	0
2023-08-21	stadtpark	9	Geranium x magnificum	morning	Ants	0	100	2400	0	1288	45159stadtpark	0
2023-08-21	stadtpark	10	Bistorta affinis	morning	Bumblebees	0	100	2400	0	1288	45159stadtpark	0
2023-08-21	stadtpark	10	Bistorta affinis	morning	Honey bees	0	100	2400	0	1288	45159stadtpark	0
2023-08-21	stadtpark	10	Bistorta affinis	morning	Wild bees	2	100	2400	8.33333	1288	45159stadtpark	0
2023-08-21	stadtpark	10	Bistorta affinis	morning	Hover flies	0	100	2400	0	1288	45159stadtpark	0
2023-08-21	stadtpark	10	Bistorta affinis	morning	Other flies	1	100	2400	4.16667	1288	45159stadtpark	0
2023-08-21	stadtpark	10	Bistorta affinis	morning	Butterflies	2	100	2400	8.33333	1288	45159stadtpark	0
2023-08-21	stadtpark	10	Bistorta affinis	morning	Wasps	0	100	2400	0	1288	45159stadtpark	0
2023-08-21	stadtpark	10	Bistorta affinis	morning	Beetles	0	100	2400	0	1288	45159stadtpark	0
2023-08-21	stadtpark	10	Bistorta affinis	morning	True bugs	0	100	2400	0	1288	45159stadtpark	0
2023-08-21	stadtpark	10	Bistorta affinis	morning	Ants	0	100	2400	0	1288	45159stadtpark	0
2023-08-21	stadtpark	11	Rudbeckia fulgida	morning	Bumblebees	0	78.4613	1883.07	0	1288	45159stadtpark	0
2023-08-21	stadtpark	11	Rudbeckia fulgida	morning	Honey bees	1	78.4613	1883.07	5.31047	1288	45159stadtpark	0
2023-08-21	stadtpark	11	Rudbeckia fulgida	morning	Wild bees	0	78.4613	1883.07	0	1288	45159stadtpark	0
2023-08-21	stadtpark	11	Rudbeckia fulgida	morning	Hover flies	0	78.4613	1883.07	0	1288	45159stadtpark	0
2023-08-21	stadtpark	11	Rudbeckia fulgida	morning	Other flies	0	78.4613	1883.07	0	1288	45159stadtpark	0
2023-08-21	stadtpark	11	Rudbeckia fulgida	morning	Butterflies	0	78.4613	1883.07	0	1288	45159stadtpark	0
2023-08-21	stadtpark	11	Rudbeckia fulgida	morning	Wasps	0	78.4613	1883.07	0	1288	45159stadtpark	0
2023-08-21	stadtpark	11	Rudbeckia fulgida	morning	Beetles	0	78.4613	1883.07	0	1288	45159stadtpark	0
2023-08-21	stadtpark	11	Rudbeckia fulgida	morning	True bugs	0	78.4613	1883.07	0	1288	45159stadtpark	0
2023-08-21	stadtpark	11	Rudbeckia fulgida	morning	Ants	0	78.4613	1883.07	0	1288	45159stadtpark	0
2023-08-21	stadtpark	12	Sedum telephium	morning	Bumblebees	0	90.6085	2174.61	0	1288	45159stadtpark	0
2023-08-21	stadtpark	12	Sedum telephium	morning	Honey bees	1	90.6085	2174.61	4.59854	1288	45159stadtpark	0
2023-08-21	stadtpark	12	Sedum telephium	morning	Wild bees	0	90.6085	2174.61	0	1288	45159stadtpark	0
2023-08-21	stadtpark	12	Sedum telephium	morning	Hover flies	0	90.6085	2174.61	0	1288	45159stadtpark	0
2023-08-21	stadtpark	12	Sedum telephium	morning	Other flies	0	90.6085	2174.61	0	1288	45159stadtpark	0
2023-08-21	stadtpark	12	Sedum telephium	morning	Butterflies	0	90.6085	2174.61	0	1288	45159stadtpark	0
2023-08-21	stadtpark	12	Sedum telephium	morning	Wasps	0	90.6085	2174.61	0	1288	45159stadtpark	0
2023-08-21	stadtpark	12	Sedum telephium	morning	Beetles	0	90.6085	2174.61	0	1288	45159stadtpark	0
2023-08-21	stadtpark	12	Sedum telephium	morning	True bugs	0	90.6085	2174.61	0	1288	45159stadtpark	0
2023-08-21	stadtpark	12	Sedum telephium	morning	Ants	0	90.6085	2174.61	0	1288	45159stadtpark	0
2023-08-21	stadtpark	13	Salvia farianacea	morning	Bumblebees	1	86.3744	2072.99	4.82396	1288	45159stadtpark	0
2023-08-21	stadtpark	13	Salvia farianacea	morning	Honey bees	0	86.3744	2072.99	0	1288	45159stadtpark	0
2023-08-21	stadtpark	13	Salvia farianacea	morning	Wild bees	0	86.3744	2072.99	0	1288	45159stadtpark	0
2023-08-21	stadtpark	13	Salvia farianacea	morning	Hover flies	0	86.3744	2072.99	0	1288	45159stadtpark	0
2023-08-21	stadtpark	13	Salvia farianacea	morning	Other flies	0	86.3744	2072.99	0	1288	45159stadtpark	0
2023-08-21	stadtpark	13	Salvia farianacea	morning	Butterflies	0	86.3744	2072.99	0	1288	45159stadtpark	0
2023-08-21	stadtpark	13	Salvia farianacea	morning	Wasps	0	86.3744	2072.99	0	1288	45159stadtpark	0
2023-08-21	stadtpark	13	Salvia farianacea	morning	Beetles	0	86.3744	2072.99	0	1288	45159stadtpark	0
2023-08-21	stadtpark	13	Salvia farianacea	morning	True bugs	0	86.3744	2072.99	0	1288	45159stadtpark	0
2023-08-21	stadtpark	13	Salvia farianacea	morning	Ants	0	86.3744	2072.99	0	1288	45159stadtpark	0
2023-08-21	stadtpark	14	Cleome spinosa	morning	Bumblebees	0	100	2400	0	1288	45159stadtpark	0
2023-08-21	stadtpark	14	Cleome spinosa	morning	Honey bees	0	100	2400	0	1288	45159stadtpark	0
2023-08-21	stadtpark	14	Cleome spinosa	morning	Wild bees	0	100	2400	0	1288	45159stadtpark	0
2023-08-21	stadtpark	14	Cleome spinosa	morning	Hover flies	0	100	2400	0	1288	45159stadtpark	0
2023-08-21	stadtpark	14	Cleome spinosa	morning	Other flies	0	100	2400	0	1288	45159stadtpark	0
2023-08-21	stadtpark	14	Cleome spinosa	morning	Butterflies	0	100	2400	0	1288	45159stadtpark	0
2023-08-21	stadtpark	14	Cleome spinosa	morning	Wasps	0	100	2400	0	1288	45159stadtpark	0
2023-08-21	stadtpark	14	Cleome spinosa	morning	Beetles	0	100	2400	0	1288	45159stadtpark	0
2023-08-21	stadtpark	14	Cleome spinosa	morning	True bugs	0	100	2400	0	1288	45159stadtpark	0
2023-08-21	stadtpark	14	Cleome spinosa	morning	Ants	0	100	2400	0	1288	45159stadtpark	0
2023-08-21	stadtpark	15	Canna indica	morning	Bumblebees	0	100	2400	0	1288	45159stadtpark	0
2023-08-21	stadtpark	15	Canna indica	morning	Honey bees	0	100	2400	0	1288	45159stadtpark	0
2023-08-21	stadtpark	15	Canna indica	morning	Wild bees	0	100	2400	0	1288	45159stadtpark	0
2023-08-21	stadtpark	15	Canna indica	morning	Hover flies	0	100	2400	0	1288	45159stadtpark	0
2023-08-21	stadtpark	15	Canna indica	morning	Other flies	0	100	2400	0	1288	45159stadtpark	0
2023-08-21	stadtpark	15	Canna indica	morning	Butterflies	0	100	2400	0	1288	45159stadtpark	0
2023-08-21	stadtpark	15	Canna indica	morning	Wasps	0	100	2400	0	1288	45159stadtpark	0
2023-08-21	stadtpark	15	Canna indica	morning	Beetles	0	100	2400	0	1288	45159stadtpark	0
2023-08-21	stadtpark	15	Canna indica	morning	True bugs	0	100	2400	0	1288	45159stadtpark	0
2023-08-21	stadtpark	15	Canna indica	morning	Ants	0	100	2400	0	1288	45159stadtpark	0
2023-08-21	stadtpark	16	Begonia semperflorens "Eureka White"	morning	Bumblebees	0	48.9182	1174.04	0	1288	45159stadtpark	0
2023-08-21	stadtpark	16	Begonia semperflorens "Eureka White"	morning	Honey bees	0	48.9182	1174.04	0	1288	45159stadtpark	0
2023-08-21	stadtpark	16	Begonia semperflorens "Eureka White"	morning	Wild bees	0	48.9182	1174.04	0	1288	45159stadtpark	0
2023-08-21	stadtpark	16	Begonia semperflorens "Eureka White"	morning	Hover flies	0	48.9182	1174.04	0	1288	45159stadtpark	0
2023-08-21	stadtpark	16	Begonia semperflorens "Eureka White"	morning	Other flies	0	48.9182	1174.04	0	1288	45159stadtpark	0
2023-08-21	stadtpark	16	Begonia semperflorens "Eureka White"	morning	Butterflies	0	48.9182	1174.04	0	1288	45159stadtpark	0
2023-08-21	stadtpark	16	Begonia semperflorens "Eureka White"	morning	Wasps	0	48.9182	1174.04	0	1288	45159stadtpark	0
2023-08-21	stadtpark	16	Begonia semperflorens "Eureka White"	morning	Beetles	0	48.9182	1174.04	0	1288	45159stadtpark	0
2023-08-21	stadtpark	16	Begonia semperflorens "Eureka White"	morning	True bugs	0	48.9182	1174.04	0	1288	45159stadtpark	0
2023-08-21	stadtpark	16	Begonia semperflorens "Eureka White"	morning	Ants	0	48.9182	1174.04	0	1288	45159stadtpark	0
2023-08-21	stadtpark	17	Hibiscus syriacus	morning	Bumblebees	0	61.5943	1478.26	0	1288	45159stadtpark	0
2023-08-21	stadtpark	17	Hibiscus syriacus	morning	Honey bees	0	61.5943	1478.26	0	1288	45159stadtpark	0
2023-08-21	stadtpark	17	Hibiscus syriacus	morning	Wild bees	0	61.5943	1478.26	0	1288	45159stadtpark	0
2023-08-21	stadtpark	17	Hibiscus syriacus	morning	Hover flies	0	61.5943	1478.26	0	1288	45159stadtpark	0
2023-08-21	stadtpark	17	Hibiscus syriacus	morning	Other flies	0	61.5943	1478.26	0	1288	45159stadtpark	0
2023-08-21	stadtpark	17	Hibiscus syriacus	morning	Butterflies	0	61.5943	1478.26	0	1288	45159stadtpark	0
2023-08-21	stadtpark	17	Hibiscus syriacus	morning	Wasps	0	61.5943	1478.26	0	1288	45159stadtpark	0
2023-08-21	stadtpark	17	Hibiscus syriacus	morning	Beetles	0	61.5943	1478.26	0	1288	45159stadtpark	0
2023-08-21	stadtpark	17	Hibiscus syriacus	morning	True bugs	0	61.5943	1478.26	0	1288	45159stadtpark	0
2023-08-21	stadtpark	17	Hibiscus syriacus	morning	Ants	0	61.5943	1478.26	0	1288	45159stadtpark	0
2023-08-21	stadtpark	18	Geranium x magnificum	morning	Bumblebees	0	100	2400	0	1288	45159stadtpark	0
2023-08-21	stadtpark	18	Geranium x magnificum	morning	Honey bees	0	100	2400	0	1288	45159stadtpark	0
2023-08-21	stadtpark	18	Geranium x magnificum	morning	Wild bees	0	100	2400	0	1288	45159stadtpark	0
2023-08-21	stadtpark	18	Geranium x magnificum	morning	Hover flies	0	100	2400	0	1288	45159stadtpark	0
2023-08-21	stadtpark	18	Geranium x magnificum	morning	Other flies	0	100	2400	0	1288	45159stadtpark	0
2023-08-21	stadtpark	18	Geranium x magnificum	morning	Butterflies	0	100	2400	0	1288	45159stadtpark	0
2023-08-21	stadtpark	18	Geranium x magnificum	morning	Wasps	0	100	2400	0	1288	45159stadtpark	0
2023-08-21	stadtpark	18	Geranium x magnificum	morning	Beetles	0	100	2400	0	1288	45159stadtpark	0
2023-08-21	stadtpark	18	Geranium x magnificum	morning	True bugs	0	100	2400	0	1288	45159stadtpark	0
2023-08-21	stadtpark	18	Geranium x magnificum	morning	Ants	0	100	2400	0	1288	45159stadtpark	0
2023-08-21	stadtpark	19	Anemone japonica	morning	Bumblebees	0	58.3862	1401.27	0	1288	45159stadtpark	0
2023-08-21	stadtpark	19	Anemone japonica	morning	Honey bees	1	58.3862	1401.27	7.13639	1288	45159stadtpark	0
2023-08-21	stadtpark	19	Anemone japonica	morning	Wild bees	0	58.3862	1401.27	0	1288	45159stadtpark	0
2023-08-21	stadtpark	19	Anemone japonica	morning	Hover flies	0	58.3862	1401.27	0	1288	45159stadtpark	0
2023-08-21	stadtpark	19	Anemone japonica	morning	Other flies	0	58.3862	1401.27	0	1288	45159stadtpark	0
2023-08-21	stadtpark	19	Anemone japonica	morning	Butterflies	0	58.3862	1401.27	0	1288	45159stadtpark	0
2023-08-21	stadtpark	19	Anemone japonica	morning	Wasps	0	58.3862	1401.27	0	1288	45159stadtpark	0
2023-08-21	stadtpark	19	Anemone japonica	morning	Beetles	0	58.3862	1401.27	0	1288	45159stadtpark	0
2023-08-21	stadtpark	19	Anemone japonica	morning	True bugs	0	58.3862	1401.27	0	1288	45159stadtpark	0
2023-08-21	stadtpark	19	Anemone japonica	morning	Ants	0	58.3862	1401.27	0	1288	45159stadtpark	0
2023-08-21	stadtpark	20	Geranium x magnificum	morning	Bumblebees	0	85.142	2043.41	0	1288	45159stadtpark	0
2023-08-21	stadtpark	20	Geranium x magnificum	morning	Honey bees	0	85.142	2043.41	0	1288	45159stadtpark	0
2023-08-21	stadtpark	20	Geranium x magnificum	morning	Wild bees	1	85.142	2043.41	4.89379	1288	45159stadtpark	0
2023-08-21	stadtpark	20	Geranium x magnificum	morning	Hover flies	0	85.142	2043.41	0	1288	45159stadtpark	0
2023-08-21	stadtpark	20	Geranium x magnificum	morning	Other flies	0	85.142	2043.41	0	1288	45159stadtpark	0
2023-08-21	stadtpark	20	Geranium x magnificum	morning	Butterflies	0	85.142	2043.41	0	1288	45159stadtpark	0
2023-08-21	stadtpark	20	Geranium x magnificum	morning	Wasps	0	85.142	2043.41	0	1288	45159stadtpark	0
2023-08-21	stadtpark	20	Geranium x magnificum	morning	Beetles	0	85.142	2043.41	0	1288	45159stadtpark	0
2023-08-21	stadtpark	20	Geranium x magnificum	morning	True bugs	0	85.142	2043.41	0	1288	45159stadtpark	0
2023-08-21	stadtpark	20	Geranium x magnificum	morning	Ants	0	85.142	2043.41	0	1288	45159stadtpark	0
2023-08-21	stadtpark	21	Salvia yangii	morning	Bumblebees	0	30.6564	735.754	0	1288	45159stadtpark	0
2023-08-21	stadtpark	21	Salvia yangii	morning	Honey bees	2	30.6564	735.754	27.183	1288	45159stadtpark	0
2023-08-21	stadtpark	21	Salvia yangii	morning	Wild bees	0	30.6564	735.754	0	1288	45159stadtpark	0
2023-08-21	stadtpark	21	Salvia yangii	morning	Hover flies	0	30.6564	735.754	0	1288	45159stadtpark	0
2023-08-21	stadtpark	21	Salvia yangii	morning	Other flies	0	30.6564	735.754	0	1288	45159stadtpark	0
2023-08-21	stadtpark	21	Salvia yangii	morning	Butterflies	0	30.6564	735.754	0	1288	45159stadtpark	0
2023-08-21	stadtpark	21	Salvia yangii	morning	Wasps	0	30.6564	735.754	0	1288	45159stadtpark	0
2023-08-21	stadtpark	21	Salvia yangii	morning	Beetles	0	30.6564	735.754	0	1288	45159stadtpark	0
2023-08-21	stadtpark	21	Salvia yangii	morning	True bugs	0	30.6564	735.754	0	1288	45159stadtpark	0
2023-08-21	stadtpark	21	Salvia yangii	morning	Ants	0	30.6564	735.754	0	1288	45159stadtpark	0
2023-08-21	stadtpark	22	Campanula persicifolia	morning	Bumblebees	0	13.6463	327.51	0	1288	45159stadtpark	0
2023-08-21	stadtpark	22	Campanula persicifolia	morning	Honey bees	0	13.6463	327.51	0	1288	45159stadtpark	0
2023-08-21	stadtpark	22	Campanula persicifolia	morning	Wild bees	0	13.6463	327.51	0	1288	45159stadtpark	0
2023-08-21	stadtpark	22	Campanula persicifolia	morning	Hover flies	0	13.6463	327.51	0	1288	45159stadtpark	0
2023-08-21	stadtpark	22	Campanula persicifolia	morning	Other flies	0	13.6463	327.51	0	1288	45159stadtpark	0
2023-08-21	stadtpark	22	Campanula persicifolia	morning	Butterflies	0	13.6463	327.51	0	1288	45159stadtpark	0
2023-08-21	stadtpark	22	Campanula persicifolia	morning	Wasps	0	13.6463	327.51	0	1288	45159stadtpark	0
2023-08-21	stadtpark	22	Campanula persicifolia	morning	Beetles	0	13.6463	327.51	0	1288	45159stadtpark	0
2023-08-21	stadtpark	22	Campanula persicifolia	morning	True bugs	0	13.6463	327.51	0	1288	45159stadtpark	0
2023-08-21	stadtpark	22	Campanula persicifolia	morning	Ants	0	13.6463	327.51	0	1288	45159stadtpark	0
2023-08-21	stadtpark	23	Achillea filipendulina	morning	Bumblebees	0	53.2964	1279.11	0	1288	45159stadtpark	0
2023-08-21	stadtpark	23	Achillea filipendulina	morning	Honey bees	0	53.2964	1279.11	0	1288	45159stadtpark	0
2023-08-21	stadtpark	23	Achillea filipendulina	morning	Wild bees	0	53.2964	1279.11	0	1288	45159stadtpark	0
2023-08-21	stadtpark	23	Achillea filipendulina	morning	Hover flies	0	53.2964	1279.11	0	1288	45159stadtpark	0
2023-08-21	stadtpark	23	Achillea filipendulina	morning	Other flies	0	53.2964	1279.11	0	1288	45159stadtpark	0
2023-08-21	stadtpark	23	Achillea filipendulina	morning	Butterflies	0	53.2964	1279.11	0	1288	45159stadtpark	0
2023-08-21	stadtpark	23	Achillea filipendulina	morning	Wasps	0	53.2964	1279.11	0	1288	45159stadtpark	0
2023-08-21	stadtpark	23	Achillea filipendulina	morning	Beetles	0	53.2964	1279.11	0	1288	45159stadtpark	0
2023-08-21	stadtpark	23	Achillea filipendulina	morning	True bugs	0	53.2964	1279.11	0	1288	45159stadtpark	0
2023-08-21	stadtpark	23	Achillea filipendulina	morning	Ants	0	53.2964	1279.11	0	1288	45159stadtpark	0
2023-08-21	stadtpark	24	Rudbeckia fulgida	morning	Bumblebees	0	100	2400	0	1288	45159stadtpark	0
2023-08-21	stadtpark	24	Rudbeckia fulgida	morning	Honey bees	0	100	2400	0	1288	45159stadtpark	0
2023-08-21	stadtpark	24	Rudbeckia fulgida	morning	Wild bees	2	100	2400	8.33333	1288	45159stadtpark	0
2023-08-21	stadtpark	24	Rudbeckia fulgida	morning	Hover flies	0	100	2400	0	1288	45159stadtpark	0
2023-08-21	stadtpark	24	Rudbeckia fulgida	morning	Other flies	0	100	2400	0	1288	45159stadtpark	0
2023-08-21	stadtpark	24	Rudbeckia fulgida	morning	Butterflies	0	100	2400	0	1288	45159stadtpark	0
2023-08-21	stadtpark	24	Rudbeckia fulgida	morning	Wasps	0	100	2400	0	1288	45159stadtpark	0
2023-08-21	stadtpark	24	Rudbeckia fulgida	morning	Beetles	0	100	2400	0	1288	45159stadtpark	0
2023-08-21	stadtpark	24	Rudbeckia fulgida	morning	True bugs	0	100	2400	0	1288	45159stadtpark	0
2023-08-21	stadtpark	24	Rudbeckia fulgida	morning	Ants	0	100	2400	0	1288	45159stadtpark	0
2023-08-21	stadtpark	25	Eryngium planum "Flachblatt-Mannstreu"	morning	Bumblebees	0	46.099	1106.38	0	1288	45159stadtpark	0
2023-08-21	stadtpark	25	Eryngium planum "Flachblatt-Mannstreu"	morning	Honey bees	0	46.099	1106.38	0	1288	45159stadtpark	0
2023-08-21	stadtpark	25	Eryngium planum "Flachblatt-Mannstreu"	morning	Wild bees	0	46.099	1106.38	0	1288	45159stadtpark	0
2023-08-21	stadtpark	25	Eryngium planum "Flachblatt-Mannstreu"	morning	Hover flies	0	46.099	1106.38	0	1288	45159stadtpark	0
2023-08-21	stadtpark	25	Eryngium planum "Flachblatt-Mannstreu"	morning	Other flies	0	46.099	1106.38	0	1288	45159stadtpark	0
2023-08-21	stadtpark	25	Eryngium planum "Flachblatt-Mannstreu"	morning	Butterflies	0	46.099	1106.38	0	1288	45159stadtpark	0
2023-08-21	stadtpark	25	Eryngium planum "Flachblatt-Mannstreu"	morning	Wasps	0	46.099	1106.38	0	1288	45159stadtpark	0
2023-08-21	stadtpark	25	Eryngium planum "Flachblatt-Mannstreu"	morning	Beetles	0	46.099	1106.38	0	1288	45159stadtpark	0
2023-08-21	stadtpark	25	Eryngium planum "Flachblatt-Mannstreu"	morning	True bugs	0	46.099	1106.38	0	1288	45159stadtpark	0
2023-08-21	stadtpark	25	Eryngium planum "Flachblatt-Mannstreu"	morning	Ants	0	46.099	1106.38	0	1288	45159stadtpark	0
2023-08-21	stadtpark	26	Rudbeckia fulgida	morning	Bumblebees	0	100	2400	0	1288	45159stadtpark	0
2023-08-21	stadtpark	26	Rudbeckia fulgida	morning	Honey bees	1	100	2400	4.16667	1288	45159stadtpark	0
2023-08-21	stadtpark	26	Rudbeckia fulgida	morning	Wild bees	0	100	2400	0	1288	45159stadtpark	0
2023-08-21	stadtpark	26	Rudbeckia fulgida	morning	Hover flies	0	100	2400	0	1288	45159stadtpark	0
2023-08-21	stadtpark	26	Rudbeckia fulgida	morning	Other flies	0	100	2400	0	1288	45159stadtpark	0
2023-08-21	stadtpark	26	Rudbeckia fulgida	morning	Butterflies	0	100	2400	0	1288	45159stadtpark	0
2023-08-21	stadtpark	26	Rudbeckia fulgida	morning	Wasps	0	100	2400	0	1288	45159stadtpark	0
2023-08-21	stadtpark	26	Rudbeckia fulgida	morning	Beetles	0	100	2400	0	1288	45159stadtpark	0
2023-08-21	stadtpark	26	Rudbeckia fulgida	morning	True bugs	0	100	2400	0	1288	45159stadtpark	0
2023-08-21	stadtpark	26	Rudbeckia fulgida	morning	Ants	0	100	2400	0	1288	45159stadtpark	0
2023-08-21	bismarckplatz	27	Geranium x magnificum	morning	Bumblebees	0	100	2400	0	183	45159bismarckplatz	1
2023-08-21	bismarckplatz	27	Geranium x magnificum	morning	Honey bees	0	100	2400	0	183	45159bismarckplatz	0
2023-08-21	bismarckplatz	27	Geranium x magnificum	morning	Wild bees	5	100	2400	20.8333	183	45159bismarckplatz	0
2023-08-21	bismarckplatz	27	Geranium x magnificum	morning	Hover flies	0	100	2400	0	183	45159bismarckplatz	0
2023-08-21	bismarckplatz	27	Geranium x magnificum	morning	Other flies	0	100	2400	0	183	45159bismarckplatz	0
2023-08-21	bismarckplatz	27	Geranium x magnificum	morning	Butterflies	0	100	2400	0	183	45159bismarckplatz	0
2023-08-21	bismarckplatz	27	Geranium x magnificum	morning	Wasps	0	100	2400	0	183	45159bismarckplatz	0
2023-08-21	bismarckplatz	27	Geranium x magnificum	morning	Beetles	0	100	2400	0	183	45159bismarckplatz	0
2023-08-21	bismarckplatz	27	Geranium x magnificum	morning	True bugs	0	100	2400	0	183	45159bismarckplatz	0
2023-08-21	bismarckplatz	27	Geranium x magnificum	morning	Ants	0	100	2400	0	183	45159bismarckplatz	0
2023-08-21	bismarckplatz	28	Echinacea purpurea "pink"	morning	Bumblebees	0	41.167	988.009	0	183	45159bismarckplatz	0
2023-08-21	bismarckplatz	28	Echinacea purpurea "pink"	morning	Honey bees	0	41.167	988.009	0	183	45159bismarckplatz	0
2023-08-21	bismarckplatz	28	Echinacea purpurea "pink"	morning	Wild bees	1	41.167	988.009	10.1214	183	45159bismarckplatz	0
2023-08-21	bismarckplatz	28	Echinacea purpurea "pink"	morning	Hover flies	0	41.167	988.009	0	183	45159bismarckplatz	0
2023-08-21	bismarckplatz	28	Echinacea purpurea "pink"	morning	Other flies	0	41.167	988.009	0	183	45159bismarckplatz	0
2023-08-21	bismarckplatz	28	Echinacea purpurea "pink"	morning	Butterflies	0	41.167	988.009	0	183	45159bismarckplatz	0
2023-08-21	bismarckplatz	28	Echinacea purpurea "pink"	morning	Wasps	0	41.167	988.009	0	183	45159bismarckplatz	0
2023-08-21	bismarckplatz	28	Echinacea purpurea "pink"	morning	Beetles	0	41.167	988.009	0	183	45159bismarckplatz	0
2023-08-21	bismarckplatz	28	Echinacea purpurea "pink"	morning	True bugs	0	41.167	988.009	0	183	45159bismarckplatz	0
2023-08-21	bismarckplatz	28	Echinacea purpurea "pink"	morning	Ants	0	41.167	988.009	0	183	45159bismarckplatz	0
2023-08-21	bismarckplatz	29	Anemone japonica	morning	Bumblebees	0	54.6553	1311.73	0	183	45159bismarckplatz	0
2023-08-21	bismarckplatz	29	Anemone japonica	morning	Honey bees	0	54.6553	1311.73	0	183	45159bismarckplatz	0
2023-08-21	bismarckplatz	29	Anemone japonica	morning	Wild bees	0	54.6553	1311.73	0	183	45159bismarckplatz	0
2023-08-21	bismarckplatz	29	Anemone japonica	morning	Hover flies	0	54.6553	1311.73	0	183	45159bismarckplatz	0
2023-08-21	bismarckplatz	29	Anemone japonica	morning	Other flies	0	54.6553	1311.73	0	183	45159bismarckplatz	0
2023-08-21	bismarckplatz	29	Anemone japonica	morning	Butterflies	0	54.6553	1311.73	0	183	45159bismarckplatz	0
2023-08-21	bismarckplatz	29	Anemone japonica	morning	Wasps	0	54.6553	1311.73	0	183	45159bismarckplatz	0
2023-08-21	bismarckplatz	29	Anemone japonica	morning	Beetles	0	54.6553	1311.73	0	183	45159bismarckplatz	0
2023-08-21	bismarckplatz	29	Anemone japonica	morning	True bugs	0	54.6553	1311.73	0	183	45159bismarckplatz	0
2023-08-21	bismarckplatz	29	Anemone japonica	morning	Ants	0	54.6553	1311.73	0	183	45159bismarckplatz	0
2023-08-21	albertstrasse	1	Petunia cultivars "Nightsky"	afternoon	Bumblebees	0	60.5848	1454.03	0	623	45159albertstrasse	1
2023-08-21	albertstrasse	1	Petunia cultivars "Nightsky"	afternoon	Honey bees	0	60.5848	1454.03	0	623	45159albertstrasse	0
2023-08-21	albertstrasse	1	Petunia cultivars "Nightsky"	afternoon	Wild bees	0	60.5848	1454.03	0	623	45159albertstrasse	0
2023-08-21	albertstrasse	1	Petunia cultivars "Nightsky"	afternoon	Hover flies	0	60.5848	1454.03	0	623	45159albertstrasse	0
2023-08-21	albertstrasse	1	Petunia cultivars "Nightsky"	afternoon	Other flies	0	60.5848	1454.03	0	623	45159albertstrasse	0
2023-08-21	albertstrasse	1	Petunia cultivars "Nightsky"	afternoon	Butterflies	0	60.5848	1454.03	0	623	45159albertstrasse	0
2023-08-21	albertstrasse	1	Petunia cultivars "Nightsky"	afternoon	Wasps	0	60.5848	1454.03	0	623	45159albertstrasse	0
2023-08-21	albertstrasse	1	Petunia cultivars "Nightsky"	afternoon	Beetles	0	60.5848	1454.03	0	623	45159albertstrasse	0
2023-08-21	albertstrasse	1	Petunia cultivars "Nightsky"	afternoon	True bugs	0	60.5848	1454.03	0	623	45159albertstrasse	0
2023-08-21	albertstrasse	1	Petunia cultivars "Nightsky"	afternoon	Ants	0	60.5848	1454.03	0	623	45159albertstrasse	0
2023-08-21	albertstrasse	2	Canna indica	afternoon	Bumblebees	0	100	2400	0	623	45159albertstrasse	0
2023-08-21	albertstrasse	2	Canna indica	afternoon	Honey bees	0	100	2400	0	623	45159albertstrasse	0
2023-08-21	albertstrasse	2	Canna indica	afternoon	Wild bees	0	100	2400	0	623	45159albertstrasse	0
2023-08-21	albertstrasse	2	Canna indica	afternoon	Hover flies	0	100	2400	0	623	45159albertstrasse	0
2023-08-21	albertstrasse	2	Canna indica	afternoon	Other flies	0	100	2400	0	623	45159albertstrasse	0
2023-08-21	albertstrasse	2	Canna indica	afternoon	Butterflies	0	100	2400	0	623	45159albertstrasse	0
2023-08-21	albertstrasse	2	Canna indica	afternoon	Wasps	0	100	2400	0	623	45159albertstrasse	0
2023-08-21	albertstrasse	2	Canna indica	afternoon	Beetles	0	100	2400	0	623	45159albertstrasse	0
2023-08-21	albertstrasse	2	Canna indica	afternoon	True bugs	0	100	2400	0	623	45159albertstrasse	0
2023-08-21	albertstrasse	2	Canna indica	afternoon	Ants	0	100	2400	0	623	45159albertstrasse	0
2023-08-21	albertstrasse	3	Salvia farianacea	afternoon	Bumblebees	0	100	2400	0	623	45159albertstrasse	0
2023-08-21	albertstrasse	3	Salvia farianacea	afternoon	Honey bees	0	100	2400	0	623	45159albertstrasse	0
2023-08-21	albertstrasse	3	Salvia farianacea	afternoon	Wild bees	0	100	2400	0	623	45159albertstrasse	0
2023-08-21	albertstrasse	3	Salvia farianacea	afternoon	Hover flies	0	100	2400	0	623	45159albertstrasse	0
2023-08-21	albertstrasse	3	Salvia farianacea	afternoon	Other flies	0	100	2400	0	623	45159albertstrasse	0
2023-08-21	albertstrasse	3	Salvia farianacea	afternoon	Butterflies	0	100	2400	0	623	45159albertstrasse	0
2023-08-21	albertstrasse	3	Salvia farianacea	afternoon	Wasps	0	100	2400	0	623	45159albertstrasse	0
2023-08-21	albertstrasse	3	Salvia farianacea	afternoon	Beetles	0	100	2400	0	623	45159albertstrasse	0
2023-08-21	albertstrasse	3	Salvia farianacea	afternoon	True bugs	0	100	2400	0	623	45159albertstrasse	0
2023-08-21	albertstrasse	3	Salvia farianacea	afternoon	Ants	0	100	2400	0	623	45159albertstrasse	0
2023-08-21	albertstrasse	4	Begonia semperflorens "Eureka Scarlet"	afternoon	Bumblebees	0	71.001	1704.02	0	623	45159albertstrasse	0
2023-08-21	albertstrasse	4	Begonia semperflorens "Eureka Scarlet"	afternoon	Honey bees	0	71.001	1704.02	0	623	45159albertstrasse	0
2023-08-21	albertstrasse	4	Begonia semperflorens "Eureka Scarlet"	afternoon	Wild bees	0	71.001	1704.02	0	623	45159albertstrasse	0
2023-08-21	albertstrasse	4	Begonia semperflorens "Eureka Scarlet"	afternoon	Hover flies	0	71.001	1704.02	0	623	45159albertstrasse	0
2023-08-21	albertstrasse	4	Begonia semperflorens "Eureka Scarlet"	afternoon	Other flies	0	71.001	1704.02	0	623	45159albertstrasse	0
2023-08-21	albertstrasse	4	Begonia semperflorens "Eureka Scarlet"	afternoon	Butterflies	0	71.001	1704.02	0	623	45159albertstrasse	0
2023-08-21	albertstrasse	4	Begonia semperflorens "Eureka Scarlet"	afternoon	Wasps	0	71.001	1704.02	0	623	45159albertstrasse	0
2023-08-21	albertstrasse	4	Begonia semperflorens "Eureka Scarlet"	afternoon	Beetles	0	71.001	1704.02	0	623	45159albertstrasse	0
2023-08-21	albertstrasse	4	Begonia semperflorens "Eureka Scarlet"	afternoon	True bugs	0	71.001	1704.02	0	623	45159albertstrasse	0
2023-08-21	albertstrasse	4	Begonia semperflorens "Eureka Scarlet"	afternoon	Ants	0	71.001	1704.02	0	623	45159albertstrasse	0
2023-08-21	albertstrasse	5	Alcaltheae spp.	afternoon	Bumblebees	0	87.1401	2091.36	0	623	45159albertstrasse	0
2023-08-21	albertstrasse	5	Alcaltheae spp.	afternoon	Honey bees	0	87.1401	2091.36	0	623	45159albertstrasse	0
2023-08-21	albertstrasse	5	Alcaltheae spp.	afternoon	Wild bees	0	87.1401	2091.36	0	623	45159albertstrasse	0
2023-08-21	albertstrasse	5	Alcaltheae spp.	afternoon	Hover flies	0	87.1401	2091.36	0	623	45159albertstrasse	0
2023-08-21	albertstrasse	5	Alcaltheae spp.	afternoon	Other flies	0	87.1401	2091.36	0	623	45159albertstrasse	0
2023-08-21	albertstrasse	5	Alcaltheae spp.	afternoon	Butterflies	0	87.1401	2091.36	0	623	45159albertstrasse	0
2023-08-21	albertstrasse	5	Alcaltheae spp.	afternoon	Wasps	0	87.1401	2091.36	0	623	45159albertstrasse	0
2023-08-21	albertstrasse	5	Alcaltheae spp.	afternoon	Beetles	0	87.1401	2091.36	0	623	45159albertstrasse	0
2023-08-21	albertstrasse	5	Alcaltheae spp.	afternoon	True bugs	0	87.1401	2091.36	0	623	45159albertstrasse	0
2023-08-21	albertstrasse	5	Alcaltheae spp.	afternoon	Ants	0	87.1401	2091.36	0	623	45159albertstrasse	0
2023-08-21	albertstrasse	6	Begonia semperflorens "Eureka White"	afternoon	Bumblebees	0	100	2400	0	623	45159albertstrasse	0
2023-08-21	albertstrasse	6	Begonia semperflorens "Eureka White"	afternoon	Honey bees	0	100	2400	0	623	45159albertstrasse	0
2023-08-21	albertstrasse	6	Begonia semperflorens "Eureka White"	afternoon	Wild bees	0	100	2400	0	623	45159albertstrasse	0
2023-08-21	albertstrasse	6	Begonia semperflorens "Eureka White"	afternoon	Hover flies	0	100	2400	0	623	45159albertstrasse	0
2023-08-21	albertstrasse	6	Begonia semperflorens "Eureka White"	afternoon	Other flies	0	100	2400	0	623	45159albertstrasse	0
2023-08-21	albertstrasse	6	Begonia semperflorens "Eureka White"	afternoon	Butterflies	0	100	2400	0	623	45159albertstrasse	0
2023-08-21	albertstrasse	6	Begonia semperflorens "Eureka White"	afternoon	Wasps	1	100	2400	4.16667	623	45159albertstrasse	0
2023-08-21	albertstrasse	6	Begonia semperflorens "Eureka White"	afternoon	Beetles	0	100	2400	0	623	45159albertstrasse	0
2023-08-21	albertstrasse	6	Begonia semperflorens "Eureka White"	afternoon	True bugs	0	100	2400	0	623	45159albertstrasse	0
2023-08-21	albertstrasse	6	Begonia semperflorens "Eureka White"	afternoon	Ants	0	100	2400	0	623	45159albertstrasse	0
2023-08-21	albertstrasse	7	Salvia farianacea	afternoon	Bumblebees	0	70.4805	1691.53	0	623	45159albertstrasse	0
2023-08-21	albertstrasse	7	Salvia farianacea	afternoon	Honey bees	1	70.4805	1691.53	5.9118	623	45159albertstrasse	0
2023-08-21	albertstrasse	7	Salvia farianacea	afternoon	Wild bees	0	70.4805	1691.53	0	623	45159albertstrasse	0
2023-08-21	albertstrasse	7	Salvia farianacea	afternoon	Hover flies	0	70.4805	1691.53	0	623	45159albertstrasse	0
2023-08-21	albertstrasse	7	Salvia farianacea	afternoon	Other flies	0	70.4805	1691.53	0	623	45159albertstrasse	0
2023-08-21	albertstrasse	7	Salvia farianacea	afternoon	Butterflies	0	70.4805	1691.53	0	623	45159albertstrasse	0
2023-08-21	albertstrasse	7	Salvia farianacea	afternoon	Wasps	0	70.4805	1691.53	0	623	45159albertstrasse	0
2023-08-21	albertstrasse	7	Salvia farianacea	afternoon	Beetles	0	70.4805	1691.53	0	623	45159albertstrasse	0
2023-08-21	albertstrasse	7	Salvia farianacea	afternoon	True bugs	0	70.4805	1691.53	0	623	45159albertstrasse	0
2023-08-21	albertstrasse	7	Salvia farianacea	afternoon	Ants	0	70.4805	1691.53	0	623	45159albertstrasse	0
2023-08-21	albertstrasse	8	Cleome spinosa	afternoon	Bumblebees	0	100	2400	0	623	45159albertstrasse	0
2023-08-21	albertstrasse	8	Cleome spinosa	afternoon	Honey bees	0	100	2400	0	623	45159albertstrasse	0
2023-08-21	albertstrasse	8	Cleome spinosa	afternoon	Wild bees	0	100	2400	0	623	45159albertstrasse	0
2023-08-21	albertstrasse	8	Cleome spinosa	afternoon	Hover flies	0	100	2400	0	623	45159albertstrasse	0
2023-08-21	albertstrasse	8	Cleome spinosa	afternoon	Other flies	1	100	2400	4.16667	623	45159albertstrasse	0
2023-08-21	albertstrasse	8	Cleome spinosa	afternoon	Butterflies	0	100	2400	0	623	45159albertstrasse	0
2023-08-21	albertstrasse	8	Cleome spinosa	afternoon	Wasps	0	100	2400	0	623	45159albertstrasse	0
2023-08-21	albertstrasse	8	Cleome spinosa	afternoon	Beetles	0	100	2400	0	623	45159albertstrasse	0
2023-08-21	albertstrasse	8	Cleome spinosa	afternoon	True bugs	0	100	2400	0	623	45159albertstrasse	0
2023-08-21	albertstrasse	8	Cleome spinosa	afternoon	Ants	0	100	2400	0	623	45159albertstrasse	0
2023-08-21	albertstrasse	9	Canna indica	afternoon	Bumblebees	0	39.2967	943.12	0	623	45159albertstrasse	0
2023-08-21	albertstrasse	9	Canna indica	afternoon	Honey bees	0	39.2967	943.12	0	623	45159albertstrasse	0
2023-08-21	albertstrasse	9	Canna indica	afternoon	Wild bees	0	39.2967	943.12	0	623	45159albertstrasse	0
2023-08-21	albertstrasse	9	Canna indica	afternoon	Hover flies	0	39.2967	943.12	0	623	45159albertstrasse	0
2023-08-21	albertstrasse	9	Canna indica	afternoon	Other flies	0	39.2967	943.12	0	623	45159albertstrasse	0
2023-08-21	albertstrasse	9	Canna indica	afternoon	Butterflies	0	39.2967	943.12	0	623	45159albertstrasse	0
2023-08-21	albertstrasse	9	Canna indica	afternoon	Wasps	0	39.2967	943.12	0	623	45159albertstrasse	0
2023-08-21	albertstrasse	9	Canna indica	afternoon	Beetles	0	39.2967	943.12	0	623	45159albertstrasse	0
2023-08-21	albertstrasse	9	Canna indica	afternoon	True bugs	0	39.2967	943.12	0	623	45159albertstrasse	0
2023-08-21	albertstrasse	9	Canna indica	afternoon	Ants	0	39.2967	943.12	0	623	45159albertstrasse	0
2023-08-21	albertstrasse	10	Tagetes patula "orange"	afternoon	Bumblebees	0	33.4278	802.266	0	623	45159albertstrasse	0
2023-08-21	albertstrasse	10	Tagetes patula "orange"	afternoon	Honey bees	0	33.4278	802.266	0	623	45159albertstrasse	0
2023-08-21	albertstrasse	10	Tagetes patula "orange"	afternoon	Wild bees	0	33.4278	802.266	0	623	45159albertstrasse	0
2023-08-21	albertstrasse	10	Tagetes patula "orange"	afternoon	Hover flies	0	33.4278	802.266	0	623	45159albertstrasse	0
2023-08-21	albertstrasse	10	Tagetes patula "orange"	afternoon	Other flies	0	33.4278	802.266	0	623	45159albertstrasse	0
2023-08-21	albertstrasse	10	Tagetes patula "orange"	afternoon	Butterflies	0	33.4278	802.266	0	623	45159albertstrasse	0
2023-08-21	albertstrasse	10	Tagetes patula "orange"	afternoon	Wasps	0	33.4278	802.266	0	623	45159albertstrasse	0
2023-08-21	albertstrasse	10	Tagetes patula "orange"	afternoon	Beetles	0	33.4278	802.266	0	623	45159albertstrasse	0
2023-08-21	albertstrasse	10	Tagetes patula "orange"	afternoon	True bugs	0	33.4278	802.266	0	623	45159albertstrasse	0
2023-08-21	albertstrasse	10	Tagetes patula "orange"	afternoon	Ants	0	33.4278	802.266	0	623	45159albertstrasse	0
2023-08-21	albertstrasse	11	Salvia splendens "Red"	afternoon	Bumblebees	0	50.7231	1217.35	0	623	45159albertstrasse	0
2023-08-21	albertstrasse	11	Salvia splendens "Red"	afternoon	Honey bees	0	50.7231	1217.35	0	623	45159albertstrasse	0
2023-08-21	albertstrasse	11	Salvia splendens "Red"	afternoon	Wild bees	0	50.7231	1217.35	0	623	45159albertstrasse	0
2023-08-21	albertstrasse	11	Salvia splendens "Red"	afternoon	Hover flies	0	50.7231	1217.35	0	623	45159albertstrasse	0
2023-08-21	albertstrasse	11	Salvia splendens "Red"	afternoon	Other flies	0	50.7231	1217.35	0	623	45159albertstrasse	0
2023-08-21	albertstrasse	11	Salvia splendens "Red"	afternoon	Butterflies	0	50.7231	1217.35	0	623	45159albertstrasse	0
2023-08-21	albertstrasse	11	Salvia splendens "Red"	afternoon	Wasps	0	50.7231	1217.35	0	623	45159albertstrasse	0
2023-08-21	albertstrasse	11	Salvia splendens "Red"	afternoon	Beetles	0	50.7231	1217.35	0	623	45159albertstrasse	0
2023-08-21	albertstrasse	11	Salvia splendens "Red"	afternoon	True bugs	0	50.7231	1217.35	0	623	45159albertstrasse	0
2023-08-21	albertstrasse	11	Salvia splendens "Red"	afternoon	Ants	0	50.7231	1217.35	0	623	45159albertstrasse	0
2023-08-21	albertstrasse	12	Salvia splendens "purple"	afternoon	Bumblebees	0	75.0827	1801.98	0	623	45159albertstrasse	0
2023-08-21	albertstrasse	12	Salvia splendens "purple"	afternoon	Honey bees	0	75.0827	1801.98	0	623	45159albertstrasse	0
2023-08-21	albertstrasse	12	Salvia splendens "purple"	afternoon	Wild bees	0	75.0827	1801.98	0	623	45159albertstrasse	0
2023-08-21	albertstrasse	12	Salvia splendens "purple"	afternoon	Hover flies	0	75.0827	1801.98	0	623	45159albertstrasse	0
2023-08-21	albertstrasse	12	Salvia splendens "purple"	afternoon	Other flies	0	75.0827	1801.98	0	623	45159albertstrasse	0
2023-08-21	albertstrasse	12	Salvia splendens "purple"	afternoon	Butterflies	0	75.0827	1801.98	0	623	45159albertstrasse	0
2023-08-21	albertstrasse	12	Salvia splendens "purple"	afternoon	Wasps	0	75.0827	1801.98	0	623	45159albertstrasse	0
2023-08-21	albertstrasse	12	Salvia splendens "purple"	afternoon	Beetles	0	75.0827	1801.98	0	623	45159albertstrasse	0
2023-08-21	albertstrasse	12	Salvia splendens "purple"	afternoon	True bugs	0	75.0827	1801.98	0	623	45159albertstrasse	0
2023-08-21	albertstrasse	12	Salvia splendens "purple"	afternoon	Ants	0	75.0827	1801.98	0	623	45159albertstrasse	0
2023-08-21	albertstrasse	13	Salvia splendens "Red"	afternoon	Bumblebees	0	53.9306	1294.33	0	623	45159albertstrasse	0
2023-08-21	albertstrasse	13	Salvia splendens "Red"	afternoon	Honey bees	0	53.9306	1294.33	0	623	45159albertstrasse	0
2023-08-21	albertstrasse	13	Salvia splendens "Red"	afternoon	Wild bees	0	53.9306	1294.33	0	623	45159albertstrasse	0
2023-08-21	albertstrasse	13	Salvia splendens "Red"	afternoon	Hover flies	0	53.9306	1294.33	0	623	45159albertstrasse	0
2023-08-21	albertstrasse	13	Salvia splendens "Red"	afternoon	Other flies	0	53.9306	1294.33	0	623	45159albertstrasse	0
2023-08-21	albertstrasse	13	Salvia splendens "Red"	afternoon	Butterflies	0	53.9306	1294.33	0	623	45159albertstrasse	0
2023-08-21	albertstrasse	13	Salvia splendens "Red"	afternoon	Wasps	0	53.9306	1294.33	0	623	45159albertstrasse	0
2023-08-21	albertstrasse	13	Salvia splendens "Red"	afternoon	Beetles	0	53.9306	1294.33	0	623	45159albertstrasse	0
2023-08-21	albertstrasse	13	Salvia splendens "Red"	afternoon	True bugs	0	53.9306	1294.33	0	623	45159albertstrasse	0
2023-08-21	albertstrasse	13	Salvia splendens "Red"	afternoon	Ants	0	53.9306	1294.33	0	623	45159albertstrasse	0
2023-08-21	albertstrasse	14	Salvia splendens "purple"	afternoon	Bumblebees	0	26.9812	647.549	0	623	45159albertstrasse	0
2023-08-21	albertstrasse	14	Salvia splendens "purple"	afternoon	Honey bees	0	26.9812	647.549	0	623	45159albertstrasse	0
2023-08-21	albertstrasse	14	Salvia splendens "purple"	afternoon	Wild bees	0	26.9812	647.549	0	623	45159albertstrasse	0
2023-08-21	albertstrasse	14	Salvia splendens "purple"	afternoon	Hover flies	0	26.9812	647.549	0	623	45159albertstrasse	0
2023-08-21	albertstrasse	14	Salvia splendens "purple"	afternoon	Other flies	0	26.9812	647.549	0	623	45159albertstrasse	0
2023-08-21	albertstrasse	14	Salvia splendens "purple"	afternoon	Butterflies	0	26.9812	647.549	0	623	45159albertstrasse	0
2023-08-21	albertstrasse	14	Salvia splendens "purple"	afternoon	Wasps	0	26.9812	647.549	0	623	45159albertstrasse	0
2023-08-21	albertstrasse	14	Salvia splendens "purple"	afternoon	Beetles	0	26.9812	647.549	0	623	45159albertstrasse	0
2023-08-21	albertstrasse	14	Salvia splendens "purple"	afternoon	True bugs	0	26.9812	647.549	0	623	45159albertstrasse	0
2023-08-21	albertstrasse	14	Salvia splendens "purple"	afternoon	Ants	0	26.9812	647.549	0	623	45159albertstrasse	0
2023-08-21	albertstrasse	15	Begonia semperflorens "Eureka White"	afternoon	Bumblebees	0	53.4408	1282.58	0	623	45159albertstrasse	0
2023-08-21	albertstrasse	15	Begonia semperflorens "Eureka White"	afternoon	Honey bees	0	53.4408	1282.58	0	623	45159albertstrasse	0
2023-08-21	albertstrasse	15	Begonia semperflorens "Eureka White"	afternoon	Wild bees	0	53.4408	1282.58	0	623	45159albertstrasse	0
2023-08-21	albertstrasse	15	Begonia semperflorens "Eureka White"	afternoon	Hover flies	0	53.4408	1282.58	0	623	45159albertstrasse	0
2023-08-21	albertstrasse	15	Begonia semperflorens "Eureka White"	afternoon	Other flies	0	53.4408	1282.58	0	623	45159albertstrasse	0
2023-08-21	albertstrasse	15	Begonia semperflorens "Eureka White"	afternoon	Butterflies	0	53.4408	1282.58	0	623	45159albertstrasse	0
2023-08-21	albertstrasse	15	Begonia semperflorens "Eureka White"	afternoon	Wasps	0	53.4408	1282.58	0	623	45159albertstrasse	0
2023-08-21	albertstrasse	15	Begonia semperflorens "Eureka White"	afternoon	Beetles	0	53.4408	1282.58	0	623	45159albertstrasse	0
2023-08-21	albertstrasse	15	Begonia semperflorens "Eureka White"	afternoon	True bugs	0	53.4408	1282.58	0	623	45159albertstrasse	0
2023-08-21	albertstrasse	15	Begonia semperflorens "Eureka White"	afternoon	Ants	0	53.4408	1282.58	0	623	45159albertstrasse	0
2023-08-21	albertstrasse	16	Cleome spinosa	afternoon	Bumblebees	0	100	2400	0	623	45159albertstrasse	0
2023-08-21	albertstrasse	16	Cleome spinosa	afternoon	Honey bees	0	100	2400	0	623	45159albertstrasse	0
2023-08-21	albertstrasse	16	Cleome spinosa	afternoon	Wild bees	1	100	2400	4.16667	623	45159albertstrasse	0
2023-08-21	albertstrasse	16	Cleome spinosa	afternoon	Hover flies	0	100	2400	0	623	45159albertstrasse	0
2023-08-21	albertstrasse	16	Cleome spinosa	afternoon	Other flies	0	100	2400	0	623	45159albertstrasse	0
2023-08-21	albertstrasse	16	Cleome spinosa	afternoon	Butterflies	0	100	2400	0	623	45159albertstrasse	0
2023-08-21	albertstrasse	16	Cleome spinosa	afternoon	Wasps	0	100	2400	0	623	45159albertstrasse	0
2023-08-21	albertstrasse	16	Cleome spinosa	afternoon	Beetles	0	100	2400	0	623	45159albertstrasse	0
2023-08-21	albertstrasse	16	Cleome spinosa	afternoon	True bugs	0	100	2400	0	623	45159albertstrasse	0
2023-08-21	albertstrasse	16	Cleome spinosa	afternoon	Ants	0	100	2400	0	623	45159albertstrasse	0
2023-08-21	albertstrasse	17	Begonia semperflorens "Eureka Scarlet"	afternoon	Bumblebees	0	62.9225	1510.14	0	623	45159albertstrasse	0
2023-08-21	albertstrasse	17	Begonia semperflorens "Eureka Scarlet"	afternoon	Honey bees	0	62.9225	1510.14	0	623	45159albertstrasse	0
2023-08-21	albertstrasse	17	Begonia semperflorens "Eureka Scarlet"	afternoon	Wild bees	0	62.9225	1510.14	0	623	45159albertstrasse	0
2023-08-21	albertstrasse	17	Begonia semperflorens "Eureka Scarlet"	afternoon	Hover flies	0	62.9225	1510.14	0	623	45159albertstrasse	0
2023-08-21	albertstrasse	17	Begonia semperflorens "Eureka Scarlet"	afternoon	Other flies	0	62.9225	1510.14	0	623	45159albertstrasse	0
2023-08-21	albertstrasse	17	Begonia semperflorens "Eureka Scarlet"	afternoon	Butterflies	0	62.9225	1510.14	0	623	45159albertstrasse	0
2023-08-21	albertstrasse	17	Begonia semperflorens "Eureka Scarlet"	afternoon	Wasps	0	62.9225	1510.14	0	623	45159albertstrasse	0
2023-08-21	albertstrasse	17	Begonia semperflorens "Eureka Scarlet"	afternoon	Beetles	0	62.9225	1510.14	0	623	45159albertstrasse	0
2023-08-21	albertstrasse	17	Begonia semperflorens "Eureka Scarlet"	afternoon	True bugs	0	62.9225	1510.14	0	623	45159albertstrasse	0
2023-08-21	albertstrasse	17	Begonia semperflorens "Eureka Scarlet"	afternoon	Ants	0	62.9225	1510.14	0	623	45159albertstrasse	0
2023-08-21	albertstrasse	18	Canna indica	afternoon	Bumblebees	0	82.7068	1984.96	0	623	45159albertstrasse	0
2023-08-21	albertstrasse	18	Canna indica	afternoon	Honey bees	0	82.7068	1984.96	0	623	45159albertstrasse	0
2023-08-21	albertstrasse	18	Canna indica	afternoon	Wild bees	0	82.7068	1984.96	0	623	45159albertstrasse	0
2023-08-21	albertstrasse	18	Canna indica	afternoon	Hover flies	0	82.7068	1984.96	0	623	45159albertstrasse	0
2023-08-21	albertstrasse	18	Canna indica	afternoon	Other flies	0	82.7068	1984.96	0	623	45159albertstrasse	0
2023-08-21	albertstrasse	18	Canna indica	afternoon	Butterflies	0	82.7068	1984.96	0	623	45159albertstrasse	0
2023-08-21	albertstrasse	18	Canna indica	afternoon	Wasps	0	82.7068	1984.96	0	623	45159albertstrasse	0
2023-08-21	albertstrasse	18	Canna indica	afternoon	Beetles	0	82.7068	1984.96	0	623	45159albertstrasse	0
2023-08-21	albertstrasse	18	Canna indica	afternoon	True bugs	0	82.7068	1984.96	0	623	45159albertstrasse	0
[truncated: 5,391 more rows]

## Sheet: metadata
column	description
date	date at which the observation was made (dd/mm/yyyy)
location	larger area in which the flower beds were located, e.g. a municipal garden
quadrat	the designation of the specific place in which the quadrat was placed. Quadrats placed in exactly the same place get the same quadrat name.
cultivar	the name of the morphogroup/plant type on which pollinators were observed. Pollinators in the quadrat not visiting flowers of this cultivar were not counted.
coverage	the percentage cover of the cultivar in the rectangle (40cm x 60cm). NOTE this refers to the coverage of the entire plant, not just the flowers.
insect_group	the potential pollinator group being counted in the timespan of 60 seconds
morning_afternoon	was the recording taken in the morning (8am-11pm) or afternoon (2pm-5pm).
time	the time of day in which the data was collected (hh:mm).
count	the count of individuals from the insect group observed on the cultivar in the quadrat (40cm x 60cm) at this time.
insects_m2_full_coverage	the extrapolated number of an observed insect group in a 1m2 quadrat covered fully with a cultivar in a timespan of 60 seconds. NOTE this refers to 1m2 square fully covered with 1 cultivar
coverage_in_cm2	the size in cm2 of the observed cultivar
coverage_in_%	The percentage of the quadrat covered by the cultivar under observation
total_area_cultivars	the combined area of all cultivars in a location measured in m2. NOTE this refers to observed and unobserved cultivars.

## Sheet: coverage
date	location	quadrat	cultivar	coverage	morning_afternoon					coverage %
2023-08-16	kneipbecken	1	X Sonnenhut		afternoon			square	area_cultivar
2023-08-16	kneipbecken	1	X Sonnenhut		afternoon			3194720	1792401	56.1051
2023-08-16	kneipbecken	1	X Sonnenhut		afternoon
2023-08-16	kneipbecken	1	X Sonnenhut		afternoon		area square	1	3194720
2023-08-16	kneipbecken	1	X Sonnenhut		afternoon		area cultivar	2	1792401
2023-08-16	kneipbecken	1	X Sonnenhut		afternoon		area cultivar		0
2023-08-16	kneipbecken	1	X Sonnenhut		afternoon		area cultivar		0
2023-08-16	kneipbecken	1	X Sonnenhut		afternoon		area cultivar		0
2023-08-16	kneipbecken	1	X Sonnenhut		afternoon		area cultivar		0
2023-08-16	kneipbecken	1	X Sonnenhut		afternoon		area cultivar		0
2023-08-16	kneipbecken	1	X Sonnenhut		afternoon		area cultivar		0
2023-08-16	kneipbecken	1	X Sonnenhut		afternoon		area cultivar		0
2023-08-16	kneipbecken	1	X Sonnenhut		afternoon		area cultivar		0
2023-08-16	kneipbecken	1	X Sonnenhut		afternoon		area cultivar		0
2023-08-16	kneipbecken	2	Kerzenknöterich		afternoon			square	area_cultivar
2023-08-16	kneipbecken	2	Kerzenknöterich		afternoon			9893312	8892787	89.8869
2023-08-16	kneipbecken	2	Kerzenknöterich		afternoon
2023-08-16	kneipbecken	2	Kerzenknöterich		afternoon		area square	1	9893312
2023-08-16	kneipbecken	2	Kerzenknöterich		afternoon		area cultivar	2	8892787
2023-08-16	kneipbecken	2	Kerzenknöterich		afternoon		area cultivar		0
2023-08-16	kneipbecken	2	Kerzenknöterich		afternoon		area cultivar		0
2023-08-16	kneipbecken	2	Kerzenknöterich		afternoon		area cultivar		0
2023-08-16	kneipbecken	2	Kerzenknöterich		afternoon		area cultivar		0
2023-08-16	kneipbecken	2	Kerzenknöterich		afternoon		area cultivar		0
2023-08-16	kneipbecken	2	Kerzenknöterich		afternoon		area cultivar		0
2023-08-16	kneipbecken	2	Kerzenknöterich		afternoon		area cultivar		0
2023-08-16	kneipbecken	2	Kerzenknöterich		afternoon		area cultivar		0
2023-08-16	kneipbecken	2	Kerzenknöterich		afternoon		area cultivar		0
2023-08-16	kneipbecken	3	Phlox		afternoon			square	area_cultivar
2023-08-16	kneipbecken	3	Phlox		afternoon			5610480	4476659	79.791
2023-08-16	kneipbecken	3	Phlox		afternoon
2023-08-16	kneipbecken	3	Phlox		afternoon		area square	1	5610480
2023-08-16	kneipbecken	3	Phlox		afternoon		area cultivar	2	4476659
2023-08-16	kneipbecken	3	Phlox		afternoon		area cultivar		0
2023-08-16	kneipbecken	3	Phlox		afternoon		area cultivar		0
2023-08-16	kneipbecken	3	Phlox		afternoon		area cultivar		0
2023-08-16	kneipbecken	3	Phlox		afternoon		area cultivar		0
2023-08-16	kneipbecken	3	Phlox		afternoon		area cultivar		0
2023-08-16	kneipbecken	3	Phlox		afternoon		area cultivar		0
2023-08-16	kneipbecken	3	Phlox		afternoon		area cultivar		0
2023-08-16	kneipbecken	3	Phlox		afternoon		area cultivar		0
2023-08-16	kneipbecken	3	Phlox		afternoon		area cultivar		0
2023-08-16	kneipbecken	4	Flachblatt-Edeldistel		afternoon			square	area_cultivar
2023-08-16	kneipbecken	4	Flachblatt-Edeldistel		afternoon			4222512	926241	21.9358
2023-08-16	kneipbecken	4	Flachblatt-Edeldistel		afternoon
2023-08-16	kneipbecken	4	Flachblatt-Edeldistel		afternoon		area square	1	4222512
2023-08-16	kneipbecken	4	Flachblatt-Edeldistel		afternoon		area cultivar	2	926241
2023-08-16	kneipbecken	4	Flachblatt-Edeldistel		afternoon		area cultivar		0
2023-08-16	kneipbecken	4	Flachblatt-Edeldistel		afternoon		area cultivar		0
2023-08-16	kneipbecken	4	Flachblatt-Edeldistel		afternoon		area cultivar		0
2023-08-16	kneipbecken	4	Flachblatt-Edeldistel		afternoon		area cultivar		0
2023-08-16	kneipbecken	4	Flachblatt-Edeldistel		afternoon		area cultivar		0
2023-08-16	kneipbecken	4	Flachblatt-Edeldistel		afternoon		area cultivar		0
2023-08-16	kneipbecken	4	Flachblatt-Edeldistel		afternoon		area cultivar		0
2023-08-16	kneipbecken	4	Flachblatt-Edeldistel		afternoon		area cultivar		0
2023-08-16	kneipbecken	4	Flachblatt-Edeldistel		afternoon		area cultivar		0
2023-08-16	kneipbecken	5	Feinstrahl		afternoon			square	area_cultivar
2023-08-16	kneipbecken	5	Feinstrahl		afternoon			3927392	2018937	51.4066
2023-08-16	kneipbecken	5	Feinstrahl		afternoon
2023-08-16	kneipbecken	5	Feinstrahl		afternoon		area square	1	3927392
2023-08-16	kneipbecken	5	Feinstrahl		afternoon		area cultivar	2	2018937
2023-08-16	kneipbecken	5	Feinstrahl		afternoon		area cultivar		0
2023-08-16	kneipbecken	5	Feinstrahl		afternoon		area cultivar		0
2023-08-16	kneipbecken	5	Feinstrahl		afternoon		area cultivar		0
2023-08-16	kneipbecken	5	Feinstrahl		afternoon		area cultivar		0
2023-08-16	kneipbecken	5	Feinstrahl		afternoon		area cultivar		0
2023-08-16	kneipbecken	5	Feinstrahl		afternoon		area cultivar		0
2023-08-16	kneipbecken	5	Feinstrahl		afternoon		area cultivar		0
2023-08-16	kneipbecken	5	Feinstrahl		afternoon		area cultivar		0
2023-08-16	kneipbecken	5	Feinstrahl		afternoon		area cultivar		0
2023-08-16	kneipbecken	6	Saliva rot		afternoon			square	area_cultivar
2023-08-16	kneipbecken	6	Saliva rot		afternoon			7507424	6091249	81.1363
2023-08-16	kneipbecken	6	Saliva rot		afternoon
2023-08-16	kneipbecken	6	Saliva rot		afternoon		area square	1	7507424
2023-08-16	kneipbecken	6	Saliva rot		afternoon		area cultivar	2	6091249
2023-08-16	kneipbecken	6	Saliva rot		afternoon		area cultivar		0
2023-08-16	kneipbecken	6	Saliva rot		afternoon		area cultivar		0
2023-08-16	kneipbecken	6	Saliva rot		afternoon		area cultivar		0
2023-08-16	kneipbecken	6	Saliva rot		afternoon		area cultivar		0
2023-08-16	kneipbecken	6	Saliva rot		afternoon		area cultivar		0
2023-08-16	kneipbecken	6	Saliva rot		afternoon		area cultivar		0
2023-08-16	kneipbecken	6	Saliva rot		afternoon		area cultivar		0
2023-08-16	kneipbecken	6	Saliva rot		afternoon		area cultivar		0
2023-08-16	kneipbecken	6	Saliva rot		afternoon		area cultivar		0
2023-08-16	kneipbecken	7	Feinstrahl		afternoon			square	area_cultivar
2023-08-16	kneipbecken	7	Feinstrahl		afternoon			3691040	1496274	40.538
2023-08-16	kneipbecken	7	Feinstrahl		afternoon
2023-08-16	kneipbecken	7	Feinstrahl		afternoon		area square	1	3691040
2023-08-16	kneipbecken	7	Feinstrahl		afternoon		area cultivar	2	1496274
2023-08-16	kneipbecken	7	Feinstrahl		afternoon		area cultivar		0
2023-08-16	kneipbecken	7	Feinstrahl		afternoon		area cultivar		0
2023-08-16	kneipbecken	7	Feinstrahl		afternoon		area cultivar		0
2023-08-16	kneipbecken	7	Feinstrahl		afternoon		area cultivar		0
2023-08-16	kneipbecken	7	Feinstrahl		afternoon		area cultivar		0
2023-08-16	kneipbecken	7	Feinstrahl		afternoon		area cultivar		0
2023-08-16	kneipbecken	7	Feinstrahl		afternoon		area cultivar		0
2023-08-16	kneipbecken	7	Feinstrahl		afternoon		area cultivar		0
2023-08-16	kneipbecken	7	Feinstrahl		afternoon		area cultivar		0
2023-08-16	kneipbecken	8	Stockrose		afternoon			square	area_cultivar
2023-08-16	kneipbecken	8	Stockrose		afternoon			4680896	2616187	55.8907
2023-08-16	kneipbecken	8	Stockrose		afternoon
2023-08-16	kneipbecken	8	Stockrose		afternoon		area square	1	4680896
2023-08-16	kneipbecken	8	Stockrose		afternoon		area cultivar	2	2616187
2023-08-16	kneipbecken	8	Stockrose		afternoon		area cultivar		0
2023-08-16	kneipbecken	8	Stockrose		afternoon		area cultivar		0
2023-08-16	kneipbecken	8	Stockrose		afternoon		area cultivar		0
2023-08-16	kneipbecken	8	Stockrose		afternoon		area cultivar		0
2023-08-16	kneipbecken	8	Stockrose		afternoon		area cultivar		0
2023-08-16	kneipbecken	8	Stockrose		afternoon		area cultivar		0
2023-08-16	kneipbecken	8	Stockrose		afternoon		area cultivar		0
2023-08-16	kneipbecken	8	Stockrose		afternoon		area cultivar		0
2023-08-16	kneipbecken	8	Stockrose		afternoon		area cultivar		0
2023-08-16	kneipbecken	9	Studentenblume orange		afternoon			square	area_cultivar
2023-08-16	kneipbecken	9	Studentenblume orange		afternoon			5301504	4308742	81.274
2023-08-16	kneipbecken	9	Studentenblume orange		afternoon
2023-08-16	kneipbecken	9	Studentenblume orange		afternoon		area square	1	5301504
2023-08-16	kneipbecken	9	Studentenblume orange		afternoon		area cultivar	2	4308742
2023-08-16	kneipbecken	9	Studentenblume orange		afternoon		area cultivar		0
2023-08-16	kneipbecken	9	Studentenblume orange		afternoon		area cultivar		0
2023-08-16	kneipbecken	9	Studentenblume orange		afternoon		area cultivar		0
2023-08-16	kneipbecken	9	Studentenblume orange		afternoon		area cultivar		0
2023-08-16	kneipbecken	9	Studentenblume orange		afternoon		area cultivar		0
2023-08-16	kneipbecken	9	Studentenblume orange		afternoon		area cultivar		0
2023-08-16	kneipbecken	9	Studentenblume orange		afternoon		area cultivar		0
2023-08-16	kneipbecken	9	Studentenblume orange		afternoon		area cultivar		0
2023-08-16	kneipbecken	9	Studentenblume orange		afternoon		area cultivar		0
2023-08-16	kneipbecken	10	Salvia lila		afternoon			square	area_cultivar
2023-08-16	kneipbecken	10	Salvia lila		afternoon			4827504	4051588	83.9272
2023-08-16	kneipbecken	10	Salvia lila		afternoon
2023-08-16	kneipbecken	10	Salvia lila		afternoon		area square	1	4827504
2023-08-16	kneipbecken	10	Salvia lila		afternoon		area cultivar	2	4051588
2023-08-16	kneipbecken	10	Salvia lila		afternoon		area cultivar		0
2023-08-16	kneipbecken	10	Salvia lila		afternoon		area cultivar		0
2023-08-16	kneipbecken	10	Salvia lila		afternoon		area cultivar		0
2023-08-16	kneipbecken	10	Salvia lila		afternoon		area cultivar		0
2023-08-16	kneipbecken	10	Salvia lila		afternoon		area cultivar		0
2023-08-16	kneipbecken	10	Salvia lila		afternoon		area cultivar		0
2023-08-16	kneipbecken	10	Salvia lila		afternoon		area cultivar		0
2023-08-16	kneipbecken	10	Salvia lila		afternoon		area cultivar		0
2023-08-16	kneipbecken	10	Salvia lila		afternoon		area cultivar		0
2023-08-16	kneipbecken	11	Salvia weiß		afternoon			square	area_cultivar
2023-08-16	kneipbecken	11	Salvia weiß		afternoon			6074208	4740575	78.0443
2023-08-16	kneipbecken	11	Salvia weiß		afternoon
2023-08-16	kneipbecken	11	Salvia weiß		afternoon		area square	1	6074208
2023-08-16	kneipbecken	11	Salvia weiß		afternoon		area cultivar	2	4740575
2023-08-16	kneipbecken	11	Salvia weiß		afternoon		area cultivar		0
2023-08-16	kneipbecken	11	Salvia weiß		afternoon		area cultivar		0
2023-08-16	kneipbecken	11	Salvia weiß		afternoon		area cultivar		0
2023-08-16	kneipbecken	11	Salvia weiß		afternoon		area cultivar		0
2023-08-16	kneipbecken	11	Salvia weiß		afternoon		area cultivar		0
2023-08-16	kneipbecken	11	Salvia weiß		afternoon		area cultivar		0
2023-08-16	kneipbecken	11	Salvia weiß		afternoon		area cultivar		0
2023-08-16	kneipbecken	11	Salvia weiß		afternoon		area cultivar		0
2023-08-16	kneipbecken	11	Salvia weiß		afternoon		area cultivar		0
2023-08-16	kneipbecken	12	Studentenblume gelb		afternoon			square	area_cultivar
2023-08-16	kneipbecken	12	Studentenblume gelb		afternoon			5941888	5444709	91.6326
2023-08-16	kneipbecken	12	Studentenblume gelb		afternoon
2023-08-16	kneipbecken	12	Studentenblume gelb		afternoon		area square	1	5941888
2023-08-16	kneipbecken	12	Studentenblume gelb		afternoon		area cultivar	2	5444709
2023-08-16	kneipbecken	12	Studentenblume gelb		afternoon		area cultivar		0
2023-08-16	kneipbecken	12	Studentenblume gelb		afternoon		area cultivar		0
2023-08-16	kneipbecken	12	Studentenblume gelb		afternoon		area cultivar		0
2023-08-16	kneipbecken	12	Studentenblume gelb		afternoon		area cultivar		0
2023-08-16	kneipbecken	12	Studentenblume gelb		afternoon		area cultivar		0
2023-08-16	kneipbecken	12	Studentenblume gelb		afternoon		area cultivar		0
2023-08-16	kneipbecken	12	Studentenblume gelb		afternoon		area cultivar		0
2023-08-16	kneipbecken	12	Studentenblume gelb		afternoon		area cultivar		0
2023-08-16	kneipbecken	12	Studentenblume gelb		afternoon		area cultivar		0
2023-08-16	kneipbecken	13	Salvia rot		afternoon			square	area_cultivar
2023-08-16	kneipbecken	13	Salvia rot		afternoon			3444272	2983308	86.6165
2023-08-16	kneipbecken	13	Salvia rot		afternoon
2023-08-16	kneipbecken	13	Salvia rot		afternoon		area square	1	3444272
2023-08-16	kneipbecken	13	Salvia rot		afternoon		area cultivar	2	2983308
2023-08-16	kneipbecken	13	Salvia rot		afternoon		area cultivar		0
2023-08-16	kneipbecken	13	Salvia rot		afternoon		area cultivar		0
2023-08-16	kneipbecken	13	Salvia rot		afternoon		area cultivar		0
2023-08-16	kneipbecken	13	Salvia rot		afternoon		area cultivar		0
2023-08-16	kneipbecken	13	Salvia rot		afternoon		area cultivar		0
2023-08-16	kneipbecken	13	Salvia rot		afternoon		area cultivar		0
2023-08-16	kneipbecken	13	Salvia rot		afternoon		area cultivar		0
2023-08-16	kneipbecken	13	Salvia rot		afternoon		area cultivar		0
2023-08-16	kneipbecken	13	Salvia rot		afternoon		area cultivar		0
2023-08-16	kneipbecken	14	Katzenminze		afternoon			square	area_cultivar
2023-08-16	kneipbecken	14	Katzenminze		afternoon			6320160	5654397	89.466
2023-08-16	kneipbecken	14	Katzenminze		afternoon
2023-08-16	kneipbecken	14	Katzenminze		afternoon		area square	1	6320160
2023-08-16	kneipbecken	14	Katzenminze		afternoon		area cultivar	2	5654397
2023-08-16	kneipbecken	14	Katzenminze		afternoon		area cultivar		0
2023-08-16	kneipbecken	14	Katzenminze		afternoon		area cultivar		0
2023-08-16	kneipbecken	14	Katzenminze		afternoon		area cultivar		0
2023-08-16	kneipbecken	14	Katzenminze		afternoon		area cultivar		0
2023-08-16	kneipbecken	14	Katzenminze		afternoon		area cultivar		0
2023-08-16	kneipbecken	14	Katzenminze		afternoon		area cultivar		0
2023-08-16	kneipbecken	14	Katzenminze		afternoon		area cultivar		0
2023-08-16	kneipbecken	14	Katzenminze		afternoon		area cultivar		0
2023-08-16	kneipbecken	14	Katzenminze		afternoon		area cultivar		0
2023-08-16	kneipbecken	15	Pur Pur Sonnenhut rosa		afternoon			square	area_cultivar
2023-08-16	kneipbecken	15	Pur Pur Sonnenhut rosa		afternoon			3854720	2845962	73.8306
2023-08-16	kneipbecken	15	Pur Pur Sonnenhut rosa		afternoon
2023-08-16	kneipbecken	15	Pur Pur Sonnenhut rosa		afternoon		area square	1	3854720
2023-08-16	kneipbecken	15	Pur Pur Sonnenhut rosa		afternoon		area cultivar	2	2845962
2023-08-16	kneipbecken	15	Pur Pur Sonnenhut rosa		afternoon		area cultivar		0
2023-08-16	kneipbecken	15	Pur Pur Sonnenhut rosa		afternoon		area cultivar		0
2023-08-16	kneipbecken	15	Pur Pur Sonnenhut rosa		afternoon		area cultivar		0
2023-08-16	kneipbecken	15	Pur Pur Sonnenhut rosa		afternoon		area cultivar		0
2023-08-16	kneipbecken	15	Pur Pur Sonnenhut rosa		afternoon		area cultivar		0
2023-08-16	kneipbecken	15	Pur Pur Sonnenhut rosa		afternoon		area cultivar		0
2023-08-16	kneipbecken	15	Pur Pur Sonnenhut rosa		afternoon		area cultivar		0
2023-08-16	kneipbecken	15	Pur Pur Sonnenhut rosa		afternoon		area cultivar		0
2023-08-16	kneipbecken	15	Pur Pur Sonnenhut rosa		afternoon		area cultivar		0
2023-08-16	augsburger_strasse	16	Blauraute		afternoon			square	area_cultivar
2023-08-16	augsburger_strasse	16	Blauraute		afternoon			11139744	6463125	58.0186
2023-08-16	augsburger_strasse	16	Blauraute		afternoon
2023-08-16	augsburger_strasse	16	Blauraute		afternoon		area square	1	11139744
2023-08-16	augsburger_strasse	16	Blauraute		afternoon		area cultivar	2	6463125
2023-08-16	augsburger_strasse	16	Blauraute		afternoon		area cultivar		0
2023-08-16	augsburger_strasse	16	Blauraute		afternoon		area cultivar		0
2023-08-16	augsburger_strasse	16	Blauraute		afternoon		area cultivar		0
2023-08-16	augsburger_strasse	16	Blauraute		afternoon		area cultivar		0
2023-08-16	augsburger_strasse	16	Blauraute		afternoon		area cultivar		0
2023-08-16	augsburger_strasse	16	Blauraute		afternoon		area cultivar		0
2023-08-16	augsburger_strasse	16	Blauraute		afternoon		area cultivar		0
2023-08-16	augsburger_strasse	16	Blauraute		afternoon		area cultivar		0
2023-08-16	augsburger_strasse	16	Blauraute		afternoon		area cultivar		0
2023-08-16	augsburger_strasse	17	Goldgarbe		afternoon			square	area_cultivar
2023-08-16	augsburger_strasse	17	Goldgarbe		afternoon			6937632	5162366	74.4111
2023-08-16	augsburger_strasse	17	Goldgarbe		afternoon
2023-08-16	augsburger_strasse	17	Goldgarbe		afternoon		area square	1	6937632
2023-08-16	augsburger_strasse	17	Goldgarbe		afternoon		area cultivar	2	5162366
2023-08-16	augsburger_strasse	17	Goldgarbe		afternoon		area cultivar		0
2023-08-16	augsburger_strasse	17	Goldgarbe		afternoon		area cultivar		0
2023-08-16	augsburger_strasse	17	Goldgarbe		afternoon		area cultivar		0
2023-08-16	augsburger_strasse	17	Goldgarbe		afternoon		area cultivar		0
2023-08-16	augsburger_strasse	17	Goldgarbe		afternoon		area cultivar		0
2023-08-16	augsburger_strasse	17	Goldgarbe		afternoon		area cultivar		0
2023-08-16	augsburger_strasse	17	Goldgarbe		afternoon		area cultivar		0
2023-08-16	augsburger_strasse	17	Goldgarbe		afternoon		area cultivar		0
2023-08-16	augsburger_strasse	17	Goldgarbe		afternoon		area cultivar		0
2023-08-16	augsburger_strasse	18	Gartenhortensie		afternoon			square	area_cultivar
2023-08-16	augsburger_strasse	18	Gartenhortensie		afternoon			7475184	7138023	95.4896
2023-08-16	augsburger_strasse	18	Gartenhortensie		afternoon
2023-08-16	augsburger_strasse	18	Gartenhortensie		afternoon		area square	1	7475184
2023-08-16	augsburger_strasse	18	Gartenhortensie		afternoon		area cultivar	2	7138023
2023-08-16	augsburger_strasse	18	Gartenhortensie		afternoon		area cultivar		0
2023-08-16	augsburger_strasse	18	Gartenhortensie		afternoon		area cultivar		0
2023-08-16	augsburger_strasse	18	Gartenhortensie		afternoon		area cultivar		0
2023-08-16	augsburger_strasse	18	Gartenhortensie		afternoon		area cultivar		0
2023-08-16	augsburger_strasse	18	Gartenhortensie		afternoon		area cultivar		0
2023-08-16	augsburger_strasse	18	Gartenhortensie		afternoon		area cultivar		0
2023-08-16	augsburger_strasse	18	Gartenhortensie		afternoon		area cultivar		0
2023-08-16	augsburger_strasse	18	Gartenhortensie		afternoon		area cultivar		0
2023-08-16	augsburger_strasse	18	Gartenhortensie		afternoon		area cultivar		0
2023-08-16	augsburger_strasse	19	X Stochschnabel		afternoon			square	area_cultivar
2023-08-16	augsburger_strasse	19	X Stochschnabel		afternoon			6209632	6109939	98.3945
2023-08-16	augsburger_strasse	19	X Stochschnabel		afternoon
2023-08-16	augsburger_strasse	19	X Stochschnabel		afternoon		area square	1	6209632
2023-08-16	augsburger_strasse	19	X Stochschnabel		afternoon		area cultivar	2	6109939
2023-08-16	augsburger_strasse	19	X Stochschnabel		afternoon		area cultivar		0
2023-08-16	augsburger_strasse	19	X Stochschnabel		afternoon		area cultivar		0
2023-08-16	augsburger_strasse	19	X Stochschnabel		afternoon		area cultivar		0
2023-08-16	augsburger_strasse	19	X Stochschnabel		afternoon		area cultivar		0
2023-08-16	augsburger_strasse	19	X Stochschnabel		afternoon		area cultivar		0
2023-08-16	augsburger_strasse	19	X Stochschnabel		afternoon		area cultivar		0
2023-08-16	augsburger_strasse	19	X Stochschnabel		afternoon		area cultivar		0
2023-08-16	augsburger_strasse	19	X Stochschnabel		afternoon		area cultivar		0
2023-08-16	augsburger_strasse	19	X Stochschnabel		afternoon		area cultivar		0
2023-08-16	augsburger_strasse	20	Pur Pur Sonnenhut weiß		afternoon			square	area_cultivar
2023-08-16	augsburger_strasse	20	Pur Pur Sonnenhut weiß		afternoon			4859616	3624538	74.5849
2023-08-16	augsburger_strasse	20	Pur Pur Sonnenhut weiß		afternoon
2023-08-16	augsburger_strasse	20	Pur Pur Sonnenhut weiß		afternoon		area square	1	4859616
2023-08-16	augsburger_strasse	20	Pur Pur Sonnenhut weiß		afternoon		area cultivar	2	3624538
2023-08-16	augsburger_strasse	20	Pur Pur Sonnenhut weiß		afternoon		area cultivar		0
2023-08-16	augsburger_strasse	20	Pur Pur Sonnenhut weiß		afternoon		area cultivar		0
2023-08-16	augsburger_strasse	20	Pur Pur Sonnenhut weiß		afternoon		area cultivar		0
2023-08-16	augsburger_strasse	20	Pur Pur Sonnenhut weiß		afternoon		area cultivar		0
2023-08-16	augsburger_strasse	20	Pur Pur Sonnenhut weiß		afternoon		area cultivar		0
2023-08-16	augsburger_strasse	20	Pur Pur Sonnenhut weiß		afternoon		area cultivar		0
2023-08-16	augsburger_strasse	20	Pur Pur Sonnenhut weiß		afternoon		area cultivar		0
2023-08-16	augsburger_strasse	20	Pur Pur Sonnenhut weiß		afternoon		area cultivar		0
2023-08-16	augsburger_strasse	20	Pur Pur Sonnenhut weiß		afternoon		area cultivar		0
2023-08-16	augsburger_strasse	21	Wiesensalbei		afternoon			square	area_cultivar
2023-08-16	augsburger_strasse	21	Wiesensalbei		afternoon			6111456	3928359	64.2786
2023-08-16	augsburger_strasse	21	Wiesensalbei		afternoon
2023-08-16	augsburger_strasse	21	Wiesensalbei		afternoon		area square	1	6111456
2023-08-16	augsburger_strasse	21	Wiesensalbei		afternoon		area cultivar	2	3928359
2023-08-16	augsburger_strasse	21	Wiesensalbei		afternoon		area cultivar		0
2023-08-16	augsburger_strasse	21	Wiesensalbei		afternoon		area cultivar		0
2023-08-16	augsburger_strasse	21	Wiesensalbei		afternoon		area cultivar		0
2023-08-16	augsburger_strasse	21	Wiesensalbei		afternoon		area cultivar		0
2023-08-16	augsburger_strasse	21	Wiesensalbei		afternoon		area cultivar		0
2023-08-16	augsburger_strasse	21	Wiesensalbei		afternoon		area cultivar		0
2023-08-16	augsburger_strasse	21	Wiesensalbei		afternoon		area cultivar		0
2023-08-16	augsburger_strasse	21	Wiesensalbei		afternoon		area cultivar		0
2023-08-16	augsburger_strasse	21	Wiesensalbei		afternoon		area cultivar		0
2023-08-16	augsburger_strasse	22	Pur Pur Sonnenhut rosa		afternoon			square	area_cultivar
2023-08-16	augsburger_strasse	22	Pur Pur Sonnenhut rosa		afternoon			2043936	1258284	61.5618
2023-08-16	augsburger_strasse	22	Pur Pur Sonnenhut rosa		afternoon
2023-08-16	augsburger_strasse	22	Pur Pur Sonnenhut rosa		afternoon		area square	1	2043936
2023-08-16	augsburger_strasse	22	Pur Pur Sonnenhut rosa		afternoon		area cultivar	2	1258284
2023-08-16	augsburger_strasse	22	Pur Pur Sonnenhut rosa		afternoon		area cultivar		0
2023-08-16	augsburger_strasse	22	Pur Pur Sonnenhut rosa		afternoon		area cultivar		0
2023-08-16	augsburger_strasse	22	Pur Pur Sonnenhut rosa		afternoon		area cultivar		0
2023-08-16	augsburger_strasse	22	Pur Pur Sonnenhut rosa		afternoon		area cultivar		0
2023-08-16	augsburger_strasse	22	Pur Pur Sonnenhut rosa		afternoon		area cultivar		0
2023-08-16	augsburger_strasse	22	Pur Pur Sonnenhut rosa		afternoon		area cultivar		0
2023-08-16	augsburger_strasse	22	Pur Pur Sonnenhut rosa		afternoon		area cultivar		0
2023-08-16	augsburger_strasse	22	Pur Pur Sonnenhut rosa		afternoon		area cultivar		0
2023-08-16	augsburger_strasse	22	Pur Pur Sonnenhut rosa		afternoon		area cultivar		0
2023-08-16	augsburger_strasse	23	X Sonnenhut		afternoon			square	area_cultivar
2023-08-16	augsburger_strasse	23	X Sonnenhut		afternoon			3006720	2655673	88.3246
2023-08-16	augsburger_strasse	23	X Sonnenhut		afternoon
2023-08-16	augsburger_strasse	23	X Sonnenhut		afternoon		area square	1	3006720
2023-08-16	augsburger_strasse	23	X Sonnenhut		afternoon		area cultivar	2	2655673
2023-08-16	augsburger_strasse	23	X Sonnenhut		afternoon		area cultivar		0
2023-08-16	augsburger_strasse	23	X Sonnenhut		afternoon		area cultivar		0
2023-08-16	augsburger_strasse	23	X Sonnenhut		afternoon		area cultivar		0
2023-08-16	augsburger_strasse	23	X Sonnenhut		afternoon		area cultivar		0
2023-08-16	augsburger_strasse	23	X Sonnenhut		afternoon		area cultivar		0
2023-08-16	augsburger_strasse	23	X Sonnenhut		afternoon		area cultivar		0
2023-08-16	augsburger_strasse	23	X Sonnenhut		afternoon		area cultivar		0
2023-08-16	augsburger_strasse	23	X Sonnenhut		afternoon		area cultivar		0
2023-08-16	augsburger_strasse	23	X Sonnenhut		afternoon		area cultivar		0
2023-08-16	augsburger_strasse	24	A. ageratoides var. Adustuts		afternoon			square	area_cultivar
2023-08-16	augsburger_strasse	24	A. ageratoides var. Adustuts		afternoon			5464064	5464064	100
2023-08-16	augsburger_strasse	24	A. ageratoides var. Adustuts		afternoon
2023-08-16	augsburger_strasse	24	A. ageratoides var. Adustuts		afternoon		area square	1	5464064
2023-08-16	augsburger_strasse	24	A. ageratoides var. Adustuts		afternoon		area cultivar	2	5464064
2023-08-16	augsburger_strasse	24	A. ageratoides var. Adustuts		afternoon		area cultivar		0
2023-08-16	augsburger_strasse	24	A. ageratoides var. Adustuts		afternoon		area cultivar		0
2023-08-16	augsburger_strasse	24	A. ageratoides var. Adustuts		afternoon		area cultivar		0
2023-08-16	augsburger_strasse	24	A. ageratoides var. Adustuts		afternoon		area cultivar		0
2023-08-16	augsburger_strasse	24	A. ageratoides var. Adustuts		afternoon		area cultivar		0
2023-08-16	augsburger_strasse	24	A. ageratoides var. Adustuts		afternoon		area cultivar		0
2023-08-16	augsburger_strasse	24	A. ageratoides var. Adustuts		afternoon		area cultivar		0
2023-08-16	augsburger_strasse	24	A. ageratoides var. Adustuts		afternoon		area cultivar		0
2023-08-16	augsburger_strasse	24	A. ageratoides var. Adustuts		afternoon		area cultivar		0
2023-08-16	augsburger_strasse	25	Pur Pur Sonnenhut weiß		afternoon			square	area_cultivar
2023-08-16	augsburger_strasse	25	Pur Pur Sonnenhut weiß		afternoon			5513728	4329600	78.524
2023-08-16	augsburger_strasse	25	Pur Pur Sonnenhut weiß		afternoon
2023-08-16	augsburger_strasse	25	Pur Pur Sonnenhut weiß		afternoon		area square	1	5513728
2023-08-16	augsburger_strasse	25	Pur Pur Sonnenhut weiß		afternoon		area cultivar	2	4329600
2023-08-16	augsburger_strasse	25	Pur Pur Sonnenhut weiß		afternoon		area cultivar		0
2023-08-16	augsburger_strasse	25	Pur Pur Sonnenhut weiß		afternoon		area cultivar		0
2023-08-16	augsburger_strasse	25	Pur Pur Sonnenhut weiß		afternoon		area cultivar		0
2023-08-16	augsburger_strasse	25	Pur Pur Sonnenhut weiß		afternoon		area cultivar		0
2023-08-16	augsburger_strasse	25	Pur Pur Sonnenhut weiß		afternoon		area cultivar		0
2023-08-16	augsburger_strasse	25	Pur Pur Sonnenhut weiß		afternoon		area cultivar		0
2023-08-16	augsburger_strasse	25	Pur Pur Sonnenhut weiß		afternoon		area cultivar		0
2023-08-16	augsburger_strasse	25	Pur Pur Sonnenhut weiß		afternoon		area cultivar		0
2023-08-16	augsburger_strasse	25	Pur Pur Sonnenhut weiß		afternoon		area cultivar		0
2023-08-17	albertstrasse	1	Spinnenblume		morning			square	area_cultivar
2023-08-17	albertstrasse	1	Spinnenblume		morning			3983184	3355811	84.2495
2023-08-17	albertstrasse	1	Spinnenblume		morning
2023-08-17	albertstrasse	1	Spinnenblume		morning		area square	1	3983184
2023-08-17	albertstrasse	1	Spinnenblume		morning		area cultivar	2	3355811
2023-08-17	albertstrasse	1	Spinnenblume		morning		area cultivar		0
2023-08-17	albertstrasse	1	Spinnenblume		morning		area cultivar		0
2023-08-17	albertstrasse	1	Spinnenblume		morning		area cultivar		0
2023-08-17	albertstrasse	1	Spinnenblume		morning		area cultivar		0
2023-08-17	albertstrasse	1	Spinnenblume		morning		area cultivar		0
2023-08-17	albertstrasse	1	Spinnenblume		morning		area cultivar		0
2023-08-17	albertstrasse	1	Spinnenblume		morning		area cultivar		0
2023-08-17	albertstrasse	1	Spinnenblume		morning		area cultivar		0
2023-08-17	albertstrasse	1	Spinnenblume		morning		area cultivar		0
2023-08-17	albertstrasse	2	Lilien gelb		morning			square	area_cultivar
2023-08-17	albertstrasse	2	Lilien gelb		morning			3017120	1434317	47.5393
2023-08-17	albertstrasse	2	Lilien gelb		morning
2023-08-17	albertstrasse	2	Lilien gelb		morning		area square	1	3017120
2023-08-17	albertstrasse	2	Lilien gelb		morning		area cultivar	2	518273
2023-08-17	albertstrasse	2	Lilien gelb		morning		area cultivar	3	916044
2023-08-17	albertstrasse	2	Lilien gelb		morning		area cultivar		0
2023-08-17	albertstrasse	2	Lilien gelb		morning		area cultivar		0
2023-08-17	albertstrasse	2	Lilien gelb		morning		area cultivar		0
2023-08-17	albertstrasse	2	Lilien gelb		morning		area cultivar		0
2023-08-17	albertstrasse	2	Lilien gelb		morning		area cultivar		0
2023-08-17	albertstrasse	2	Lilien gelb		morning		area cultivar		0
2023-08-17	albertstrasse	2	Lilien gelb		morning		area cultivar		0
2023-08-17	albertstrasse	2	Lilien gelb		morning		area cultivar		0
2023-08-17	albertstrasse	3	Franzosenkraut		morning			square	area_cultivar
2023-08-17	albertstrasse	3	Franzosenkraut		morning			4691152	4691152	100
2023-08-17	albertstrasse	3	Franzosenkraut		morning
2023-08-17	albertstrasse	3	Franzosenkraut		morning		area square	1	4691152
2023-08-17	albertstrasse	3	Franzosenkraut		morning		area cultivar	2	4691152
2023-08-17	albertstrasse	3	Franzosenkraut		morning		area cultivar		0
2023-08-17	albertstrasse	3	Franzosenkraut		morning		area cultivar		0
2023-08-17	albertstrasse	3	Franzosenkraut		morning		area cultivar		0
2023-08-17	albertstrasse	3	Franzosenkraut		morning		area cultivar		0
2023-08-17	albertstrasse	3	Franzosenkraut		morning		area cultivar		0
2023-08-17	albertstrasse	3	Franzosenkraut		morning		area cultivar		0
2023-08-17	albertstrasse	3	Franzosenkraut		morning		area cultivar		0
2023-08-17	albertstrasse	3	Franzosenkraut		morning		area cultivar		0
2023-08-17	albertstrasse	3	Franzosenkraut		morning		area cultivar		0
2023-08-17	albertstrasse	4	Begonien rot		morning			square	area_cultivar
2023-08-17	albertstrasse	4	Begonien rot		morning			4235088	2157437	50.942
2023-08-17	albertstrasse	4	Begonien rot		morning
2023-08-17	albertstrasse	4	Begonien rot		morning		area square	1	4235088
2023-08-17	albertstrasse	4	Begonien rot		morning		area cultivar	2	2157437
2023-08-17	albertstrasse	4	Begonien rot		morning		area cultivar		0
2023-08-17	albertstrasse	4	Begonien rot		morning		area cultivar		0
2023-08-17	albertstrasse	4	Begonien rot		morning		area cultivar		0
2023-08-17	albertstrasse	4	Begonien rot		morning		area cultivar		0
2023-08-17	albertstrasse	4	Begonien rot		morning		area cultivar		0
2023-08-17	albertstrasse	4	Begonien rot		morning		area cultivar		0
2023-08-17	albertstrasse	4	Begonien rot		morning		area cultivar		0
2023-08-17	albertstrasse	4	Begonien rot		morning		area cultivar		0
2023-08-17	albertstrasse	4	Begonien rot		morning		area cultivar		0
2023-08-17	albertstrasse	5	Begonien weiß		morning			square	area_cultivar
2023-08-17	albertstrasse	5	Begonien weiß		morning			5297808	2531811	47.7898
2023-08-17	albertstrasse	5	Begonien weiß		morning
2023-08-17	albertstrasse	5	Begonien weiß		morning		area square	1	5297808
2023-08-17	albertstrasse	5	Begonien weiß		morning		area cultivar	2	2531811
2023-08-17	albertstrasse	5	Begonien weiß		morning		area cultivar		0
2023-08-17	albertstrasse	5	Begonien weiß		morning		area cultivar		0
2023-08-17	albertstrasse	5	Begonien weiß		morning		area cultivar		0
2023-08-17	albertstrasse	5	Begonien weiß		morning		area cultivar		0
2023-08-17	albertstrasse	5	Begonien weiß		morning		area cultivar		0
2023-08-17	albertstrasse	5	Begonien weiß		morning		area cultivar		0
2023-08-17	albertstrasse	5	Begonien weiß		morning		area cultivar		0
2023-08-17	albertstrasse	5	Begonien weiß		morning		area cultivar		0
2023-08-17	albertstrasse	5	Begonien weiß		morning		area cultivar		0
2023-08-17	albertstrasse	6	Salvien weiß		morning			square	area_cultivar
2023-08-17	albertstrasse	6	Salvien weiß		morning			5581824	2850927	51.0752
2023-08-17	albertstrasse	6	Salvien weiß		morning
2023-08-17	albertstrasse	6	Salvien weiß		morning		area square	1	5581824
2023-08-17	albertstrasse	6	Salvien weiß		morning		area cultivar	2	2850927
2023-08-17	albertstrasse	6	Salvien weiß		morning		area cultivar		0
2023-08-17	albertstrasse	6	Salvien weiß		morning		area cultivar		0
2023-08-17	albertstrasse	6	Salvien weiß		morning		area cultivar		0
2023-08-17	albertstrasse	6	Salvien weiß		morning		area cultivar		0
2023-08-17	albertstrasse	6	Salvien weiß		morning		area cultivar		0
2023-08-17	albertstrasse	6	Salvien weiß		morning		area cultivar		0
2023-08-17	albertstrasse	6	Salvien weiß		morning		area cultivar		0
2023-08-17	albertstrasse	6	Salvien weiß		morning		area cultivar		0
2023-08-17	albertstrasse	6	Salvien weiß		morning		area cultivar		0
2023-08-17	albertstrasse	7	Salvien rot		morning			square	area_cultivar
2023-08-17	albertstrasse	7	Salvien rot		morning			4730656	1985140	41.9633
2023-08-17	albertstrasse	7	Salvien rot		morning
2023-08-17	albertstrasse	7	Salvien rot		morning		area square	1	4730656
2023-08-17	albertstrasse	7	Salvien rot		morning		area cultivar	2	1333820
2023-08-17	albertstrasse	7	Salvien rot		morning		area cultivar	3	651320
2023-08-17	albertstrasse	7	Salvien rot		morning		area cultivar		0
2023-08-17	albertstrasse	7	Salvien rot		morning		area cultivar		0
2023-08-17	albertstrasse	7	Salvien rot		morning		area cultivar		0
2023-08-17	albertstrasse	7	Salvien rot		morning		area cultivar		0
2023-08-17	albertstrasse	7	Salvien rot		morning		area cultivar		0
2023-08-17	albertstrasse	7	Salvien rot		morning		area cultivar		0
2023-08-17	albertstrasse	7	Salvien rot		morning		area cultivar		0
2023-08-17	albertstrasse	7	Salvien rot		morning		area cultivar		0
2023-08-17	albertstrasse	8	Salvien lila		morning			square	area_cultivar
2023-08-17	albertstrasse	8	Salvien lila		morning			6879600	2852862	41.4684
2023-08-17	albertstrasse	8	Salvien lila		morning
2023-08-17	albertstrasse	8	Salvien lila		morning		area square	1	6879600
2023-08-17	albertstrasse	8	Salvien lila		morning		area cultivar	2	1586148
2023-08-17	albertstrasse	8	Salvien lila		morning		area cultivar	3	1266714
2023-08-17	albertstrasse	8	Salvien lila		morning		area cultivar		0
2023-08-17	albertstrasse	8	Salvien lila		morning		area cultivar		0
2023-08-17	albertstrasse	8	Salvien lila		morning		area cultivar		0
2023-08-17	albertstrasse	8	Salvien lila		morning		area cultivar		0
2023-08-17	albertstrasse	8	Salvien lila		morning		area cultivar		0
2023-08-17	albertstrasse	8	Salvien lila		morning		area cultivar		0
2023-08-17	albertstrasse	8	Salvien lila		morning		area cultivar		0
2023-08-17	albertstrasse	8	Salvien lila		morning		area cultivar		0
2023-08-17	albertstrasse	9	Franzosenkraut		morning			square	area_cultivar
2023-08-17	albertstrasse	9	Franzosenkraut		morning			2851072	2851072	100
2023-08-17	albertstrasse	9	Franzosenkraut		morning
2023-08-17	albertstrasse	9	Franzosenkraut		morning		area square	1	2851072
2023-08-17	albertstrasse	9	Franzosenkraut		morning		area cultivar	2	2851072
2023-08-17	albertstrasse	9	Franzosenkraut		morning		area cultivar		0
2023-08-17	albertstrasse	9	Franzosenkraut		morning		area cultivar		0
2023-08-17	albertstrasse	9	Franzosenkraut		morning		area cultivar		0
2023-08-17	albertstrasse	9	Franzosenkraut		morning		area cultivar		0
2023-08-17	albertstrasse	9	Franzosenkraut		morning		area cultivar		0
2023-08-17	albertstrasse	9	Franzosenkraut		morning		area cultivar		0
2023-08-17	albertstrasse	9	Franzosenkraut		morning		area cultivar		0
2023-08-17	albertstrasse	9	Franzosenkraut		morning		area cultivar		0
2023-08-17	albertstrasse	9	Franzosenkraut		morning		area cultivar		0
2023-08-17	albertstrasse	10	Spinnenblume		morning			square	area_cultivar
2023-08-17	albertstrasse	10	Spinnenblume		morning			3802864	3802864	100
2023-08-17	albertstrasse	10	Spinnenblume		morning
2023-08-17	albertstrasse	10	Spinnenblume		morning		area square	1	3802864
2023-08-17	albertstrasse	10	Spinnenblume		morning		area cultivar	2	3802864
2023-08-17	albertstrasse	10	Spinnenblume		morning		area cultivar		0
2023-08-17	albertstrasse	10	Spinnenblume		morning		area cultivar		0
2023-08-17	albertstrasse	10	Spinnenblume		morning		area cultivar		0
2023-08-17	albertstrasse	10	Spinnenblume		morning		area cultivar		0
2023-08-17	albertstrasse	10	Spinnenblume		morning		area cultivar		0
2023-08-17	albertstrasse	10	Spinnenblume		morning		area cultivar		0
2023-08-17	albertstrasse	10	Spinnenblume		morning		area cultivar		0
2023-08-17	albertstrasse	10	Spinnenblume		morning		area cultivar		0
2023-08-17	albertstrasse	10	Spinnenblume		morning		area cultivar		0
2023-08-17	albertstrasse	11	Lilien gelb		morning			square	area_cultivar
2023-08-17	albertstrasse	11	Lilien gelb		morning			4575648	3102596	67.8067
2023-08-17	albertstrasse	11	Lilien gelb		morning
2023-08-17	albertstrasse	11	Lilien gelb		morning		area square	1	4575648
2023-08-17	albertstrasse	11	Lilien gelb		morning		area cultivar	2	3102596
2023-08-17	albertstrasse	11	Lilien gelb		morning		area cultivar		0
2023-08-17	albertstrasse	11	Lilien gelb		morning		area cultivar		0
2023-08-17	albertstrasse	11	Lilien gelb		morning		area cultivar		0
2023-08-17	albertstrasse	11	Lilien gelb		morning		area cultivar		0
2023-08-17	albertstrasse	11	Lilien gelb		morning		area cultivar		0
2023-08-17	albertstrasse	11	Lilien gelb		morning		area cultivar		0
2023-08-17	albertstrasse	11	Lilien gelb		morning		area cultivar		0
2023-08-17	albertstrasse	11	Lilien gelb		morning		area cultivar		0
2023-08-17	albertstrasse	11	Lilien gelb		morning		area cultivar		0
2023-08-17	albertstrasse	12	Mehliger Salbei		morning			square	area_cultivar
2023-08-17	albertstrasse	12	Mehliger Salbei		morning			5023600	3923962	78.1106
2023-08-17	albertstrasse	12	Mehliger Salbei		morning
2023-08-17	albertstrasse	12	Mehliger Salbei		morning		area square	1	5023600
2023-08-17	albertstrasse	12	Mehliger Salbei		morning		area cultivar	2	3923962
2023-08-17	albertstrasse	12	Mehliger Salbei		morning		area cultivar		0
2023-08-17	albertstrasse	12	Mehliger Salbei		morning		area cultivar		0
2023-08-17	albertstrasse	12	Mehliger Salbei		morning		area cultivar		0
2023-08-17	albertstrasse	12	Mehliger Salbei		morning		area cultivar		0
2023-08-17	albertstrasse	12	Mehliger Salbei		morning		area cultivar		0
2023-08-17	albertstrasse	12	Mehliger Salbei		morning		area cultivar		0
2023-08-17	albertstrasse	12	Mehliger Salbei		morning		area cultivar		0
2023-08-17	albertstrasse	12	Mehliger Salbei		morning		area cultivar		0
2023-08-17	albertstrasse	12	Mehliger Salbei		morning		area cultivar		0
2023-08-17	albertstrasse	13	Salvien rot		morning			square	area_cultivar
2023-08-17	albertstrasse	13	Salvien rot		morning			7267360	3983304	54.8109
2023-08-17	albertstrasse	13	Salvien rot		morning
2023-08-17	albertstrasse	13	Salvien rot		morning		area square	1	7267360
2023-08-17	albertstrasse	13	Salvien rot		morning		area cultivar	2	3983304
2023-08-17	albertstrasse	13	Salvien rot		morning		area cultivar		0
2023-08-17	albertstrasse	13	Salvien rot		morning		area cultivar		0
2023-08-17	albertstrasse	13	Salvien rot		morning		area cultivar		0
2023-08-17	albertstrasse	13	Salvien rot		morning		area cultivar		0
2023-08-17	albertstrasse	13	Salvien rot		morning		area cultivar		0
2023-08-17	albertstrasse	13	Salvien rot		morning		area cultivar		0
2023-08-17	albertstrasse	13	Salvien rot		morning		area cultivar		0
2023-08-17	albertstrasse	13	Salvien rot		morning		area cultivar		0
2023-08-17	albertstrasse	13	Salvien rot		morning		area cultivar		0
2023-08-17	albertstrasse	14	Begonien weiß		morning			square	area_cultivar
2023-08-17	albertstrasse	14	Begonien weiß		morning			7343840	4838572	65.8861
2023-08-17	albertstrasse	14	Begonien weiß		morning
2023-08-17	albertstrasse	14	Begonien weiß		morning		area square	1	7343840
2023-08-17	albertstrasse	14	Begonien weiß		morning		area cultivar	2	4838572
2023-08-17	albertstrasse	14	Begonien weiß		morning		area cultivar		0
2023-08-17	albertstrasse	14	Begonien weiß		morning		area cultivar		0
2023-08-17	albertstrasse	14	Begonien weiß		morning		area cultivar		0
2023-08-17	albertstrasse	14	Begonien weiß		morning		area cultivar		0
2023-08-17	albertstrasse	14	Begonien weiß		morning		area cultivar		0
2023-08-17	albertstrasse	14	Begonien weiß		morning		area cultivar		0
2023-08-17	albertstrasse	14	Begonien weiß		morning		area cultivar		0
2023-08-17	albertstrasse	14	Begonien weiß		morning		area cultivar		0
2023-08-17	albertstrasse	14	Begonien weiß		morning		area cultivar		0
2023-08-17	albertstrasse	15	Salvien lila		morning			square	area_cultivar
2023-08-17	albertstrasse	15	Salvien lila		morning			7547344	3865286	51.2139
2023-08-17	albertstrasse	15	Salvien lila		morning
2023-08-17	albertstrasse	15	Salvien lila		morning		area square	1	7547344
2023-08-17	albertstrasse	15	Salvien lila		morning		area cultivar	2	3865286
2023-08-17	albertstrasse	15	Salvien lila		morning		area cultivar		0
2023-08-17	albertstrasse	15	Salvien lila		morning		area cultivar		0
2023-08-17	albertstrasse	15	Salvien lila		morning		area cultivar		0
2023-08-17	albertstrasse	15	Salvien lila		morning		area cultivar		0
2023-08-17	albertstrasse	15	Salvien lila		morning		area cultivar		0
2023-08-17	albertstrasse	15	Salvien lila		morning		area cultivar		0
2023-08-17	albertstrasse	15	Salvien lila		morning		area cultivar		0
2023-08-17	albertstrasse	15	Salvien lila		morning		area cultivar		0
2023-08-17	albertstrasse	15	Salvien lila		morning		area cultivar		0
2023-08-17	albertstrasse	16	Studentenblume orange		morning			square	area_cultivar
2023-08-17	albertstrasse	16	Studentenblume orange		morning			6029280	2240806	37.1654
2023-08-17	albertstrasse	16	Studentenblume orange		morning
2023-08-17	albertstrasse	16	Studentenblume orange		morning		area square	1	6029280
2023-08-17	albertstrasse	16	Studentenblume orange		morning		area cultivar	2	1519284
2023-08-17	albertstrasse	16	Studentenblume orange		morning		area cultivar	3	721522
2023-08-17	albertstrasse	16	Studentenblume orange		morning		area cultivar		0
2023-08-17	albertstrasse	16	Studentenblume orange		morning		area cultivar		0
2023-08-17	albertstrasse	16	Studentenblume orange		morning		area cultivar		0
2023-08-17	albertstrasse	16	Studentenblume orange		morning		area cultivar		0
2023-08-17	albertstrasse	16	Studentenblume orange		morning		area cultivar		0
2023-08-17	albertstrasse	16	Studentenblume orange		morning		area cultivar		0
2023-08-17	albertstrasse	16	Studentenblume orange		morning		area cultivar		0
2023-08-17	albertstrasse	16	Studentenblume orange		morning		area cultivar		0
2023-08-17	albertstrasse	17	Stockrose		morning			square	area_cultivar
2023-08-17	albertstrasse	17	Stockrose		morning			4721446	3506457	74.2666
2023-08-17	albertstrasse	17	Stockrose		morning
2023-08-17	albertstrasse	17	Stockrose		morning		area square	1	4721446
2023-08-17	albertstrasse	17	Stockrose		morning		area cultivar	2	3506457
2023-08-17	albertstrasse	17	Stockrose		morning		area cultivar		0
2023-08-17	albertstrasse	17	Stockrose		morning		area cultivar		0
2023-08-17	albertstrasse	17	Stockrose		morning		area cultivar		0
2023-08-17	albertstrasse	17	Stockrose		morning		area cultivar		0
2023-08-17	albertstrasse	17	Stockrose		morning		area cultivar		0
2023-08-17	albertstrasse	17	Stockrose		morning		area cultivar		0
2023-08-17	albertstrasse	17	Stockrose		morning		area cultivar		0
2023-08-17	albertstrasse	17	Stockrose		morning		area cultivar		0
2023-08-17	albertstrasse	17	Stockrose		morning		area cultivar		0
2023-08-17	albertstrasse	18	Franzosenkraut		morning			square	area_cultivar
2023-08-17	albertstrasse	18	Franzosenkraut		morning			4766464	4766464	100
2023-08-17	albertstrasse	18	Franzosenkraut		morning
2023-08-17	albertstrasse	18	Franzosenkraut		morning		area square	1	4766464
2023-08-17	albertstrasse	18	Franzosenkraut		morning		area cultivar	2	4766464
2023-08-17	albertstrasse	18	Franzosenkraut		morning		area cultivar		0
2023-08-17	albertstrasse	18	Franzosenkraut		morning		area cultivar		0
2023-08-17	albertstrasse	18	Franzosenkraut		morning		area cultivar		0
2023-08-17	albertstrasse	18	Franzosenkraut		morning		area cultivar		0
2023-08-17	albertstrasse	18	Franzosenkraut		morning		area cultivar		0
2023-08-17	albertstrasse	18	Franzosenkraut		morning		area cultivar		0
2023-08-17	albertstrasse	18	Franzosenkraut		morning		area cultivar		0
2023-08-17	albertstrasse	18	Franzosenkraut		morning		area cultivar		0
2023-08-17	albertstrasse	18	Franzosenkraut		morning		area cultivar		0
2023-08-17	albertstrasse	19	Lilien gelb		morning			square	area_cultivar
2023-08-17	albertstrasse	19	Lilien gelb		morning			2501232	1265649	50.601
2023-08-17	albertstrasse	19	Lilien gelb		morning
2023-08-17	albertstrasse	19	Lilien gelb		morning		area square	1	2501232
2023-08-17	albertstrasse	19	Lilien gelb		morning		area cultivar	2	1265649
2023-08-17	albertstrasse	19	Lilien gelb		morning		area cultivar		0
2023-08-17	albertstrasse	19	Lilien gelb		morning		area cultivar		0
2023-08-17	albertstrasse	19	Lilien gelb		morning		area cultivar		0
2023-08-17	albertstrasse	19	Lilien gelb		morning		area cultivar		0
2023-08-17	albertstrasse	19	Lilien gelb		morning		area cultivar		0
2023-08-17	albertstrasse	19	Lilien gelb		morning		area cultivar		0
2023-08-17	albertstrasse	19	Lilien gelb		morning		area cultivar		0
2023-08-17	albertstrasse	19	Lilien gelb		morning		area cultivar		0
2023-08-17	albertstrasse	19	Lilien gelb		morning		area cultivar		0
2023-08-17	albertstrasse	20	Begonien rot		morning			square	area_cultivar
2023-08-17	albertstrasse	20	Begonien rot		morning			4774623	3052894	63.94
2023-08-17	albertstrasse	20	Begonien rot		morning
2023-08-17	albertstrasse	20	Begonien rot		morning		area square	1	4774623
2023-08-17	albertstrasse	20	Begonien rot		morning		area cultivar	2	3052894
2023-08-17	albertstrasse	20	Begonien rot		morning		area cultivar		0
2023-08-17	albertstrasse	20	Begonien rot		morning		area cultivar		0
2023-08-17	albertstrasse	20	Begonien rot		morning		area cultivar		0
2023-08-17	albertstrasse	20	Begonien rot		morning		area cultivar		0
2023-08-17	albertstrasse	20	Begonien rot		morning		area cultivar		0
2023-08-17	albertstrasse	20	Begonien rot		morning		area cultivar		0
2023-08-17	albertstrasse	20	Begonien rot		morning		area cultivar		0
2023-08-17	albertstrasse	20	Begonien rot		morning		area cultivar		0
2023-08-17	albertstrasse	20	Begonien rot		morning		area cultivar		0
2023-08-17	albertstrasse	21	Petunien lila weiß		morning			square	area_cultivar
2023-08-17	albertstrasse	21	Petunien lila weiß		morning			5353408	2371746	44.3035
2023-08-17	albertstrasse	21	Petunien lila weiß		morning
2023-08-17	albertstrasse	21	Petunien lila weiß		morning		area square	1	5353408
2023-08-17	albertstrasse	21	Petunien lila weiß		morning		area cultivar	2	1373539
2023-08-17	albertstrasse	21	Petunien lila weiß		morning		area cultivar	3	998207
2023-08-17	albertstrasse	21	Petunien lila weiß		morning		area cultivar		0
2023-08-17	albertstrasse	21	Petunien lila weiß		morning		area cultivar		0
2023-08-17	albertstrasse	21	Petunien lila weiß		morning		area cultivar		0
2023-08-17	albertstrasse	21	Petunien lila weiß		morning		area cultivar		0
2023-08-17	albertstrasse	21	Petunien lila weiß		morning		area cultivar		0
2023-08-17	albertstrasse	21	Petunien lila weiß		morning		area cultivar		0
2023-08-17	albertstrasse	21	Petunien lila weiß		morning		area cultivar		0
2023-08-17	albertstrasse	21	Petunien lila weiß		morning		area cultivar		0
2023-08-17	albertstrasse	22	Studentenblume gelb		morning			square	area_cultivar
2023-08-17	albertstrasse	22	Studentenblume gelb		morning			9065760	3009044	33.1913
2023-08-17	albertstrasse	22	Studentenblume gelb		morning
2023-08-17	albertstrasse	22	Studentenblume gelb		morning		area square	1	9065760
2023-08-17	albertstrasse	22	Studentenblume gelb		morning		area cultivar	2	2033932
2023-08-17	albertstrasse	22	Studentenblume gelb		morning		area cultivar	3	975112
2023-08-17	albertstrasse	22	Studentenblume gelb		morning		area cultivar		0
2023-08-17	albertstrasse	22	Studentenblume gelb		morning		area cultivar		0
2023-08-17	albertstrasse	22	Studentenblume gelb		morning		area cultivar		0
2023-08-17	albertstrasse	22	Studentenblume gelb		morning		area cultivar		0
2023-08-17	albertstrasse	22	Studentenblume gelb		morning		area cultivar		0
2023-08-17	albertstrasse	22	Studentenblume gelb		morning		area cultivar		0
2023-08-17	albertstrasse	22	Studentenblume gelb		morning		area cultivar		0
2023-08-17	albertstrasse	22	Studentenblume gelb		morning		area cultivar		0
2023-08-17	albertstrasse	23	Mehliger Salbei		morning			square	area_cultivar
2023-08-17	albertstrasse	23	Mehliger Salbei		morning			2289200	1437978	62.8157
2023-08-17	albertstrasse	23	Mehliger Salbei		morning
2023-08-17	albertstrasse	23	Mehliger Salbei		morning		area square	1	2289200
2023-08-17	albertstrasse	23	Mehliger Salbei		morning		area cultivar	2	1437978
2023-08-17	albertstrasse	23	Mehliger Salbei		morning		area cultivar		0
2023-08-17	albertstrasse	23	Mehliger Salbei		morning		area cultivar		0
2023-08-17	albertstrasse	23	Mehliger Salbei		morning		area cultivar		0
2023-08-17	albertstrasse	23	Mehliger Salbei		morning		area cultivar		0
2023-08-17	albertstrasse	23	Mehliger Salbei		morning		area cultivar		0
2023-08-17	albertstrasse	23	Mehliger Salbei		morning		area cultivar		0
2023-08-17	albertstrasse	23	Mehliger Salbei		morning		area cultivar		0
2023-08-17	albertstrasse	23	Mehliger Salbei		morning		area cultivar		0
2023-08-17	albertstrasse	23	Mehliger Salbei		morning		area cultivar		0
2023-08-17	albertstrasse	24	Petunien lila weiß		morning			square	area_cultivar
2023-08-17	albertstrasse	24	Petunien lila weiß		morning			8134384	4862883	59.7818
2023-08-17	albertstrasse	24	Petunien lila weiß		morning
2023-08-17	albertstrasse	24	Petunien lila weiß		morning		area square	1	8134384
2023-08-17	albertstrasse	24	Petunien lila weiß		morning		area cultivar	2	4862883
2023-08-17	albertstrasse	24	Petunien lila weiß		morning		area cultivar		0
2023-08-17	albertstrasse	24	Petunien lila weiß		morning		area cultivar		0
2023-08-17	albertstrasse	24	Petunien lila weiß		morning		area cultivar		0
2023-08-17	albertstrasse	24	Petunien lila weiß		morning		area cultivar		0
2023-08-17	albertstrasse	24	Petunien lila weiß		morning		area cultivar		0
2023-08-17	albertstrasse	24	Petunien lila weiß		morning		area cultivar		0
2023-08-17	albertstrasse	24	Petunien lila weiß		morning		area cultivar		0
2023-08-17	albertstrasse	24	Petunien lila weiß		morning		area cultivar		0
2023-08-17	albertstrasse	24	Petunien lila weiß		morning		area cultivar		0
2023-08-17	albertstrasse	25	Begonien weiß		morning			square	area_cultivar
2023-08-17	albertstrasse	25	Begonien weiß		morning			5045152	5045152	100
2023-08-17	albertstrasse	25	Begonien weiß		morning
2023-08-17	albertstrasse	25	Begonien weiß		morning		area square	1	5045152
2023-08-17	albertstrasse	25	Begonien weiß		morning		area cultivar	2	5045152
2023-08-17	albertstrasse	25	Begonien weiß		morning		area cultivar		0
2023-08-17	albertstrasse	25	Begonien weiß		morning		area cultivar		0
2023-08-17	albertstrasse	25	Begonien weiß		morning		area cultivar		0
2023-08-17	albertstrasse	25	Begonien weiß		morning		area cultivar		0
2023-08-17	albertstrasse	25	Begonien weiß		morning		area cultivar		0
2023-08-17	albertstrasse	25	Begonien weiß		morning		area cultivar		0
2023-08-17	albertstrasse	25	Begonien weiß		morning		area cultivar		0
2023-08-17	albertstrasse	25	Begonien weiß		morning		area cultivar		0
2023-08-17	albertstrasse	25	Begonien weiß		morning		area cultivar		0
2023-08-17	albertstrasse	26	Spinnenblume		morning			square	area_cultivar
2023-08-17	albertstrasse	26	Spinnenblume		morning			4154656	4154656	100
2023-08-17	albertstrasse	26	Spinnenblume		morning
2023-08-17	albertstrasse	26	Spinnenblume		morning		area square	1	4154656
2023-08-17	albertstrasse	26	Spinnenblume		morning		area cultivar	2	4154656
2023-08-17	albertstrasse	26	Spinnenblume		morning		area cultivar		0
2023-08-17	albertstrasse	26	Spinnenblume		morning		area cultivar		0
2023-08-17	albertstrasse	26	Spinnenblume		morning		area cultivar		0
2023-08-17	albertstrasse	26	Spinnenblume		morning		area cultivar		0
2023-08-17	albertstrasse	26	Spinnenblume		morning		area cultivar		0
2023-08-17	albertstrasse	26	Spinnenblume		morning		area cultivar		0
2023-08-17	albertstrasse	26	Spinnenblume		morning		area cultivar		0
2023-08-17	albertstrasse	26	Spinnenblume		morning		area cultivar		0
2023-08-17	albertstrasse	26	Spinnenblume		morning		area cultivar		0
2023-08-17	albertstrasse	27	Lilien gelb		morning			square	area_cultivar
2023-08-17	albertstrasse	27	Lilien gelb		morning			3378317	2927136	86.6448
2023-08-17	albertstrasse	27	Lilien gelb		morning
2023-08-17	albertstrasse	27	Lilien gelb		morning		area square	1	3378317
2023-08-17	albertstrasse	27	Lilien gelb		morning		area cultivar	2	2927136
2023-08-17	albertstrasse	27	Lilien gelb		morning		area cultivar		0
2023-08-17	albertstrasse	27	Lilien gelb		morning		area cultivar		0
2023-08-17	albertstrasse	27	Lilien gelb		morning		area cultivar		0
2023-08-17	albertstrasse	27	Lilien gelb		morning		area cultivar		0
2023-08-17	albertstrasse	27	Lilien gelb		morning		area cultivar		0
2023-08-17	albertstrasse	27	Lilien gelb		morning		area cultivar		0
2023-08-17	albertstrasse	27	Lilien gelb		morning		area cultivar		0
2023-08-17	albertstrasse	27	Lilien gelb		morning		area cultivar		0
2023-08-17	albertstrasse	27	Lilien gelb		morning		area cultivar		0
2023-08-17	albertstrasse	28	Studentenblume gelb		morning			square	area_cultivar
2023-08-17	albertstrasse	28	Studentenblume gelb		morning			4519418	2762360	61.122
2023-08-17	albertstrasse	28	Studentenblume gelb		morning
2023-08-17	albertstrasse	28	Studentenblume gelb		morning		area square	1	4519418
2023-08-17	albertstrasse	28	Studentenblume gelb		morning		area cultivar	2	2762360
2023-08-17	albertstrasse	28	Studentenblume gelb		morning		area cultivar		0
2023-08-17	albertstrasse	28	Studentenblume gelb		morning		area cultivar		0
2023-08-17	albertstrasse	28	Studentenblume gelb		morning		area cultivar		0
2023-08-17	albertstrasse	28	Studentenblume gelb		morning		area cultivar		0
2023-08-17	albertstrasse	28	Studentenblume gelb		morning		area cultivar		0
2023-08-17	albertstrasse	28	Studentenblume gelb		morning		area cultivar		0
2023-08-17	albertstrasse	28	Studentenblume gelb		morning		area cultivar		0
2023-08-17	albertstrasse	28	Studentenblume gelb		morning		area cultivar		0
2023-08-17	albertstrasse	28	Studentenblume gelb		morning		area cultivar		0
2023-08-17	albertstrasse	29	Mehliger Salbei		morning			square	area_cultivar
2023-08-17	albertstrasse	29	Mehliger Salbei		morning			4932419	4560810	92.466
2023-08-17	albertstrasse	29	Mehliger Salbei		morning
2023-08-17	albertstrasse	29	Mehliger Salbei		morning		area square	1	4932419
2023-08-17	albertstrasse	29	Mehliger Salbei		morning		area cultivar	2	4560810
2023-08-17	albertstrasse	29	Mehliger Salbei		morning		area cultivar		0
2023-08-17	albertstrasse	29	Mehliger Salbei		morning		area cultivar		0
2023-08-17	albertstrasse	29	Mehliger Salbei		morning		area cultivar		0
2023-08-17	albertstrasse	29	Mehliger Salbei		morning		area cultivar		0
2023-08-17	albertstrasse	29	Mehliger Salbei		morning		area cultivar		0
2023-08-17	albertstrasse	29	Mehliger Salbei		morning		area cultivar		0
2023-08-17	albertstrasse	29	Mehliger Salbei		morning		area cultivar		0
2023-08-17	albertstrasse	29	Mehliger Salbei		morning		area cultivar		0
2023-08-17	albertstrasse	29	Mehliger Salbei		morning		area cultivar		0
2023-08-17	albertstrasse	30	Begonien weiß		morning			square	area_cultivar
2023-08-17	albertstrasse	30	Begonien weiß		morning			6218500	5172919	83.186
2023-08-17	albertstrasse	30	Begonien weiß		morning
2023-08-17	albertstrasse	30	Begonien weiß		morning		area square	1	6218500
2023-08-17	albertstrasse	30	Begonien weiß		morning		area cultivar	2	5172919
2023-08-17	albertstrasse	30	Begonien weiß		morning		area cultivar		0
2023-08-17	albertstrasse	30	Begonien weiß		morning		area cultivar		0
2023-08-17	albertstrasse	30	Begonien weiß		morning		area cultivar		0
2023-08-17	albertstrasse	30	Begonien weiß		morning		area cultivar		0
2023-08-17	albertstrasse	30	Begonien weiß		morning		area cultivar		0
2023-08-17	albertstrasse	30	Begonien weiß		morning		area cultivar		0
2023-08-17	albertstrasse	30	Begonien weiß		morning		area cultivar		0
2023-08-17	albertstrasse	30	Begonien weiß		morning		area cultivar		0
2023-08-17	albertstrasse	30	Begonien weiß		morning		area cultivar		0
2023-08-17	albertstrasse	31	Spinnenblume		morning			square	area_cultivar
2023-08-17	albertstrasse	31	Spinnenblume		morning			7165248	7165248	100
2023-08-17	albertstrasse	31	Spinnenblume		morning
2023-08-17	albertstrasse	31	Spinnenblume		morning		area square	1	7165248
2023-08-17	albertstrasse	31	Spinnenblume		morning		area cultivar	2	7165248
2023-08-17	albertstrasse	31	Spinnenblume		morning		area cultivar		0
2023-08-17	albertstrasse	31	Spinnenblume		morning		area cultivar		0
2023-08-17	albertstrasse	31	Spinnenblume		morning		area cultivar		0
2023-08-17	albertstrasse	31	Spinnenblume		morning		area cultivar		0
2023-08-17	albertstrasse	31	Spinnenblume		morning		area cultivar		0
2023-08-17	albertstrasse	31	Spinnenblume		morning		area cultivar		0
2023-08-17	albertstrasse	31	Spinnenblume		morning		area cultivar		0
2023-08-17	albertstrasse	31	Spinnenblume		morning		area cultivar		0
2023-08-17	albertstrasse	31	Spinnenblume		morning		area cultivar		0
2023-08-17	albertstrasse	32	Mehliger Salbei		morning			square	area_cultivar
2023-08-17	albertstrasse	32	Mehliger Salbei		morning			6054560	4890886	80.7802
2023-08-17	albertstrasse	32	Mehliger Salbei		morning
2023-08-17	albertstrasse	32	Mehliger Salbei		morning		area square	1	6054560
2023-08-17	albertstrasse	32	Mehliger Salbei		morning		area cultivar	2	4890886
2023-08-17	albertstrasse	32	Mehliger Salbei		morning		area cultivar		0
2023-08-17	albertstrasse	32	Mehliger Salbei		morning		area cultivar		0
2023-08-17	albertstrasse	32	Mehliger Salbei		morning		area cultivar		0
2023-08-17	albertstrasse	32	Mehliger Salbei		morning		area cultivar		0
2023-08-17	albertstrasse	32	Mehliger Salbei		morning		area cultivar		0
2023-08-17	albertstrasse	32	Mehliger Salbei		morning		area cultivar		0
2023-08-17	albertstrasse	32	Mehliger Salbei		morning		area cultivar		0
2023-08-17	albertstrasse	32	Mehliger Salbei		morning		area cultivar		0
2023-08-17	albertstrasse	32	Mehliger Salbei		morning		area cultivar		0
2023-08-17	albertstrasse	33	Straucheibisch		morning			square	area_cultivar
2023-08-17	albertstrasse	33	Straucheibisch		morning			5166720	2929773	56.7047
2023-08-17	albertstrasse	33	Straucheibisch		morning
2023-08-17	albertstrasse	33	Straucheibisch		morning		area square	1	5166720
2023-08-17	albertstrasse	33	Straucheibisch		morning		area cultivar	2	2214636
2023-08-17	albertstrasse	33	Straucheibisch		morning		area cultivar	3	715137
2023-08-17	albertstrasse	33	Straucheibisch		morning		area cultivar		0
2023-08-17	albertstrasse	33	Straucheibisch		morning		area cultivar		0
2023-08-17	albertstrasse	33	Straucheibisch		morning		area cultivar		0
2023-08-17	albertstrasse	33	Straucheibisch		morning		area cultivar		0
2023-08-17	albertstrasse	33	Straucheibisch		morning		area cultivar		0
2023-08-17	albertstrasse	33	Straucheibisch		morning		area cultivar		0
2023-08-17	albertstrasse	33	Straucheibisch		morning		area cultivar		0
2023-08-17	albertstrasse	33	Straucheibisch		morning		area cultivar		0
2023-08-17	albertstrasse	34	Studentenblume gelb		morning			square	area_cultivar
2023-08-17	albertstrasse	34	Studentenblume gelb		morning			4397376	697571	15.8633
2023-08-17	albertstrasse	34	Studentenblume gelb		morning
2023-08-17	albertstrasse	34	Studentenblume gelb		morning		area square	1	4397376
2023-08-17	albertstrasse	34	Studentenblume gelb		morning		area cultivar	2	697571
2023-08-17	albertstrasse	34	Studentenblume gelb		morning		area cultivar		0
2023-08-17	albertstrasse	34	Studentenblume gelb		morning		area cultivar		0
2023-08-17	albertstrasse	34	Studentenblume gelb		morning		area cultivar		0
2023-08-17	albertstrasse	34	Studentenblume gelb		morning		area cultivar		0
2023-08-17	albertstrasse	34	Studentenblume gelb		morning		area cultivar		0
2023-08-17	albertstrasse	34	Studentenblume gelb		morning		area cultivar		0
2023-08-17	albertstrasse	34	Studentenblume gelb		morning		area cultivar		0
2023-08-17	albertstrasse	34	Studentenblume gelb		morning		area cultivar		0
2023-08-17	albertstrasse	34	Studentenblume gelb		morning		area cultivar		0
2023-08-17	albertstrasse	35	Spinnenblume		morning			square	area_cultivar
2023-08-17	albertstrasse	35	Spinnenblume		morning			4284000	4284000	100
2023-08-17	albertstrasse	35	Spinnenblume		morning
2023-08-17	albertstrasse	35	Spinnenblume		morning		area square	1	4284000
2023-08-17	albertstrasse	35	Spinnenblume		morning		area cultivar	2	4284000
2023-08-17	albertstrasse	35	Spinnenblume		morning		area cultivar		0
2023-08-17	albertstrasse	35	Spinnenblume		morning		area cultivar		0
2023-08-17	albertstrasse	35	Spinnenblume		morning		area cultivar		0
2023-08-17	albertstrasse	35	Spinnenblume		morning		area cultivar		0
2023-08-17	albertstrasse	35	Spinnenblume		morning		area cultivar		0
2023-08-17	albertstrasse	35	Spinnenblume		morning		area cultivar		0
2023-08-17	albertstrasse	35	Spinnenblume		morning		area cultivar		0
2023-08-17	albertstrasse	35	Spinnenblume		morning		area cultivar		0
2023-08-17	albertstrasse	35	Spinnenblume		morning		area cultivar		0
2023-08-17	albertstrasse	36	Begonien weiß		morning			square	area_cultivar
2023-08-17	albertstrasse	36	Begonien weiß		morning			6122906	4389425	71.6886
2023-08-17	albertstrasse	36	Begonien weiß		morning
2023-08-17	albertstrasse	36	Begonien weiß		morning		area square	1	6122906
2023-08-17	albertstrasse	36	Begonien weiß		morning		area cultivar	2	4389425
2023-08-17	albertstrasse	36	Begonien weiß		morning		area cultivar		0
2023-08-17	albertstrasse	36	Begonien weiß		morning		area cultivar		0
2023-08-17	albertstrasse	36	Begonien weiß		morning		area cultivar		0
2023-08-17	albertstrasse	36	Begonien weiß		morning		area cultivar		0
2023-08-17	albertstrasse	36	Begonien weiß		morning		area cultivar		0
2023-08-17	albertstrasse	36	Begonien weiß		morning		area cultivar		0
2023-08-17	albertstrasse	36	Begonien weiß		morning		area cultivar		0
2023-08-17	albertstrasse	36	Begonien weiß		morning		area cultivar		0
2023-08-17	albertstrasse	36	Begonien weiß		morning		area cultivar		0
2023-08-17	albertstrasse	37	Mehliger Salbei		morning			square	area_cultivar
2023-08-17	albertstrasse	37	Mehliger Salbei		morning			6249066	3772190	60.3641
2023-08-17	albertstrasse	37	Mehliger Salbei		morning
2023-08-17	albertstrasse	37	Mehliger Salbei		morning		area square	1	6249066
2023-08-17	albertstrasse	37	Mehliger Salbei		morning		area cultivar	2	3772190
2023-08-17	albertstrasse	37	Mehliger Salbei		morning		area cultivar		0
2023-08-17	albertstrasse	37	Mehliger Salbei		morning		area cultivar		0
2023-08-17	albertstrasse	37	Mehliger Salbei		morning		area cultivar		0
2023-08-17	albertstrasse	37	Mehliger Salbei		morning		area cultivar		0
2023-08-17	albertstrasse	37	Mehliger Salbei		morning		area cultivar		0
2023-08-17	albertstrasse	37	Mehliger Salbei		morning		area cultivar		0
2023-08-17	albertstrasse	37	Mehliger Salbei		morning		area cultivar		0
2023-08-17	albertstrasse	37	Mehliger Salbei		morning		area cultivar		0
2023-08-17	albertstrasse	37	Mehliger Salbei		morning		area cultivar		0
2023-08-17	kunstgalerie	1	Begonien weiß		afternoon			square	area_cultivar
2023-08-17	kunstgalerie	1	Begonien weiß		afternoon			7551273	5536337	73.3166
2023-08-17	kunstgalerie	1	Begonien weiß		afternoon
2023-08-17	kunstgalerie	1	Begonien weiß		afternoon		area square	1	7551273
2023-08-17	kunstgalerie	1	Begonien weiß		afternoon		area cultivar	2	4684817
2023-08-17	kunstgalerie	1	Begonien weiß		afternoon		area cultivar	3	851520
2023-08-17	kunstgalerie	1	Begonien weiß		afternoon		area cultivar		0
2023-08-17	kunstgalerie	1	Begonien weiß		afternoon		area cultivar		0
2023-08-17	kunstgalerie	1	Begonien weiß		afternoon		area cultivar		0
2023-08-17	kunstgalerie	1	Begonien weiß		afternoon		area cultivar		0
2023-08-17	kunstgalerie	1	Begonien weiß		afternoon		area cultivar		0
2023-08-17	kunstgalerie	1	Begonien weiß		afternoon		area cultivar		0
2023-08-17	kunstgalerie	1	Begonien weiß		afternoon		area cultivar		0
2023-08-17	kunstgalerie	1	Begonien weiß		afternoon		area cultivar		0
2023-08-17	kunstgalerie	2	Lilien gelb		afternoon			square	area_cultivar
2023-08-17	kunstgalerie	2	Lilien gelb		afternoon			6377040	6377040	100
2023-08-17	kunstgalerie	2	Lilien gelb		afternoon
2023-08-17	kunstgalerie	2	Lilien gelb		afternoon		area square	1	6377040
2023-08-17	kunstgalerie	2	Lilien gelb		afternoon		area cultivar	2	6377040
2023-08-17	kunstgalerie	2	Lilien gelb		afternoon		area cultivar		0
2023-08-17	kunstgalerie	2	Lilien gelb		afternoon		area cultivar		0
2023-08-17	kunstgalerie	2	Lilien gelb		afternoon		area cultivar		0
2023-08-17	kunstgalerie	2	Lilien gelb		afternoon		area cultivar		0
2023-08-17	kunstgalerie	2	Lilien gelb		afternoon		area cultivar		0
2023-08-17	kunstgalerie	2	Lilien gelb		afternoon		area cultivar		0
2023-08-17	kunstgalerie	2	Lilien gelb		afternoon		area cultivar		0
2023-08-17	kunstgalerie	2	Lilien gelb		afternoon		area cultivar		0
2023-08-17	kunstgalerie	2	Lilien gelb		afternoon		area cultivar		0
2023-08-17	kunstgalerie	3	Spinnenblume		afternoon			square	area_cultivar
2023-08-17	kunstgalerie	3	Spinnenblume		afternoon			6969600	6969600	100
2023-08-17	kunstgalerie	3	Spinnenblume		afternoon
2023-08-17	kunstgalerie	3	Spinnenblume		afternoon		area square	1	6969600
2023-08-17	kunstgalerie	3	Spinnenblume		afternoon		area cultivar	2	6969600
2023-08-17	kunstgalerie	3	Spinnenblume		afternoon		area cultivar		0
2023-08-17	kunstgalerie	3	Spinnenblume		afternoon		area cultivar		0
2023-08-17	kunstgalerie	3	Spinnenblume		afternoon		area cultivar		0
2023-08-17	kunstgalerie	3	Spinnenblume		afternoon		area cultivar		0
2023-08-17	kunstgalerie	3	Spinnenblume		afternoon		area cultivar		0
2023-08-17	kunstgalerie	3	Spinnenblume		afternoon		area cultivar		0
2023-08-17	kunstgalerie	3	Spinnenblume		afternoon		area cultivar		0
2023-08-17	kunstgalerie	3	Spinnenblume		afternoon		area cultivar		0
2023-08-17	kunstgalerie	3	Spinnenblume		afternoon		area cultivar		0
2023-08-17	kunstgalerie	4	Studentenblume gelb		afternoon			square	area_cultivar
2023-08-17	kunstgalerie	4	Studentenblume gelb		afternoon			7558353	2772754	36.6846
2023-08-17	kunstgalerie	4	Studentenblume gelb		afternoon
2023-08-17	kunstgalerie	4	Studentenblume gelb		afternoon		area square	1	7558353
2023-08-17	kunstgalerie	4	Studentenblume gelb		afternoon		area cultivar	2	2772754
2023-08-17	kunstgalerie	4	Studentenblume gelb		afternoon		area cultivar		0
2023-08-17	kunstgalerie	4	Studentenblume gelb		afternoon		area cultivar		0
2023-08-17	kunstgalerie	4	Studentenblume gelb		afternoon		area cultivar		0
2023-08-17	kunstgalerie	4	Studentenblume gelb		afternoon		area cultivar		0
2023-08-17	kunstgalerie	4	Studentenblume gelb		afternoon		area cultivar		0
2023-08-17	kunstgalerie	4	Studentenblume gelb		afternoon		area cultivar		0
2023-08-17	kunstgalerie	4	Studentenblume gelb		afternoon		area cultivar		0
2023-08-17	kunstgalerie	4	Studentenblume gelb		afternoon		area cultivar		0
2023-08-17	kunstgalerie	4	Studentenblume gelb		afternoon		area cultivar		0
2023-08-17	kunstgalerie	5	Studentenblume orange		afternoon			square	area_cultivar
2023-08-17	kunstgalerie	5	Studentenblume orange		afternoon			6583616	2509201	38.1128
2023-08-17	kunstgalerie	5	Studentenblume orange		afternoon
2023-08-17	kunstgalerie	5	Studentenblume orange		afternoon		area square	1	6583616
2023-08-17	kunstgalerie	5	Studentenblume orange		afternoon		area cultivar	2	2509201
2023-08-17	kunstgalerie	5	Studentenblume orange		afternoon		area cultivar		0
2023-08-17	kunstgalerie	5	Studentenblume orange		afternoon		area cultivar		0
2023-08-17	kunstgalerie	5	Studentenblume orange		afternoon		area cultivar		0
2023-08-17	kunstgalerie	5	Studentenblume orange		afternoon		area cultivar		0
2023-08-17	kunstgalerie	5	Studentenblume orange		afternoon		area cultivar		0
2023-08-17	kunstgalerie	5	Studentenblume orange		afternoon		area cultivar		0
2023-08-17	kunstgalerie	5	Studentenblume orange		afternoon		area cultivar		0
2023-08-17	kunstgalerie	5	Studentenblume orange		afternoon		area cultivar		0
2023-08-17	kunstgalerie	5	Studentenblume orange		afternoon		area cultivar		0
2023-08-17	kunstgalerie	6	Mehliger Salbei		afternoon			square	area_cultivar
2023-08-17	kunstgalerie	6	Mehliger Salbei		afternoon			6245322	5349872	85.6621
2023-08-17	kunstgalerie	6	Mehliger Salbei		afternoon
2023-08-17	kunstgalerie	6	Mehliger Salbei		afternoon		area square	1	6245322
2023-08-17	kunstgalerie	6	Mehliger Salbei		afternoon		area cultivar	2	5349872
2023-08-17	kunstgalerie	6	Mehliger Salbei		afternoon		area cultivar		0
2023-08-17	kunstgalerie	6	Mehliger Salbei		afternoon		area cultivar		0
2023-08-17	kunstgalerie	6	Mehliger Salbei		afternoon		area cultivar		0
2023-08-17	kunstgalerie	6	Mehliger Salbei		afternoon		area cultivar		0
2023-08-17	kunstgalerie	6	Mehliger Salbei		afternoon		area cultivar		0
2023-08-17	kunstgalerie	6	Mehliger Salbei		afternoon		area cultivar		0
2023-08-17	kunstgalerie	6	Mehliger Salbei		afternoon		area cultivar		0
2023-08-17	kunstgalerie	6	Mehliger Salbei		afternoon		area cultivar		0
2023-08-17	kunstgalerie	6	Mehliger Salbei		afternoon		area cultivar		0
2023-08-17	kunstgalerie	7	Salvien rot		afternoon			square	area_cultivar
2023-08-17	kunstgalerie	7	Salvien rot		afternoon			5630542	2917195	51.8102
2023-08-17	kunstgalerie	7	Salvien rot		afternoon
2023-08-17	kunstgalerie	7	Salvien rot		afternoon		area square	1	5630542
2023-08-17	kunstgalerie	7	Salvien rot		afternoon		area cultivar	2	2917195
2023-08-17	kunstgalerie	7	Salvien rot		afternoon		area cultivar		0
2023-08-17	kunstgalerie	7	Salvien rot		afternoon		area cultivar		0
2023-08-17	kunstgalerie	7	Salvien rot		afternoon		area cultivar		0
2023-08-17	kunstgalerie	7	Salvien rot		afternoon		area cultivar		0
2023-08-17	kunstgalerie	7	Salvien rot		afternoon		area cultivar		0
2023-08-17	kunstgalerie	7	Salvien rot		afternoon		area cultivar		0
2023-08-17	kunstgalerie	7	Salvien rot		afternoon		area cultivar		0
2023-08-17	kunstgalerie	7	Salvien rot		afternoon		area cultivar		0
2023-08-17	kunstgalerie	7	Salvien rot		afternoon		area cultivar		0
2023-08-17	stadtpark	8	Pur Pur Sonnenhut weiß		afternoon			square	area_cultivar
2023-08-17	stadtpark	8	Pur Pur Sonnenhut weiß		afternoon			4742143	3556368	74.995
2023-08-17	stadtpark	8	Pur Pur Sonnenhut weiß		afternoon
2023-08-17	stadtpark	8	Pur Pur Sonnenhut weiß		afternoon		area square	1	4742143
2023-08-17	stadtpark	8	Pur Pur Sonnenhut weiß		afternoon		area cultivar	2	3556368
2023-08-17	stadtpark	8	Pur Pur Sonnenhut weiß		afternoon		area cultivar		0
2023-08-17	stadtpark	8	Pur Pur Sonnenhut weiß		afternoon		area cultivar		0
2023-08-17	stadtpark	8	Pur Pur Sonnenhut weiß		afternoon		area cultivar		0
2023-08-17	stadtpark	8	Pur Pur Sonnenhut weiß		afternoon		area cultivar		0
2023-08-17	stadtpark	8	Pur Pur Sonnenhut weiß		afternoon		area cultivar		0
2023-08-17	stadtpark	8	Pur Pur Sonnenhut weiß		afternoon		area cultivar		0
2023-08-17	stadtpark	8	Pur Pur Sonnenhut weiß		afternoon		area cultivar		0
2023-08-17	stadtpark	8	Pur Pur Sonnenhut weiß		afternoon		area cultivar		0
2023-08-17	stadtpark	8	Pur Pur Sonnenhut weiß		afternoon		area cultivar		0
2023-08-17	stadtpark	9	Katzenminze		afternoon			square	area_cultivar
2023-08-17	stadtpark	9	Katzenminze		afternoon			6609328	6609328	100
2023-08-17	stadtpark	9	Katzenminze		afternoon
2023-08-17	stadtpark	9	Katzenminze		afternoon		area square	1	6609328
2023-08-17	stadtpark	9	Katzenminze		afternoon		area cultivar	2	6609328
2023-08-17	stadtpark	9	Katzenminze		afternoon		area cultivar		0
2023-08-17	stadtpark	9	Katzenminze		afternoon		area cultivar		0
2023-08-17	stadtpark	9	Katzenminze		afternoon		area cultivar		0
2023-08-17	stadtpark	9	Katzenminze		afternoon		area cultivar		0
2023-08-17	stadtpark	9	Katzenminze		afternoon		area cultivar		0
2023-08-17	stadtpark	9	Katzenminze		afternoon		area cultivar		0
2023-08-17	stadtpark	9	Katzenminze		afternoon		area cultivar		0
2023-08-17	stadtpark	9	Katzenminze		afternoon		area cultivar		0
2023-08-17	stadtpark	9	Katzenminze		afternoon		area cultivar		0
2023-08-17	stadtpark	10	X Sonnenhut		afternoon			square	area_cultivar
2023-08-17	stadtpark	10	X Sonnenhut		afternoon			5627888	4027570	71.5645
2023-08-17	stadtpark	10	X Sonnenhut		afternoon
2023-08-17	stadtpark	10	X Sonnenhut		afternoon		area square	1	5627888
2023-08-17	stadtpark	10	X Sonnenhut		afternoon		area cultivar	2	4027570
2023-08-17	stadtpark	10	X Sonnenhut		afternoon		area cultivar		0
2023-08-17	stadtpark	10	X Sonnenhut		afternoon		area cultivar		0
2023-08-17	stadtpark	10	X Sonnenhut		afternoon		area cultivar		0
2023-08-17	stadtpark	10	X Sonnenhut		afternoon		area cultivar		0
2023-08-17	stadtpark	10	X Sonnenhut		afternoon		area cultivar		0
2023-08-17	stadtpark	10	X Sonnenhut		afternoon		area cultivar		0
2023-08-17	stadtpark	10	X Sonnenhut		afternoon		area cultivar		0
2023-08-17	stadtpark	10	X Sonnenhut		afternoon		area cultivar		0
2023-08-17	stadtpark	10	X Sonnenhut		afternoon		area cultivar		0
2023-08-17	stadtpark	11	X Storchschnabel		afternoon			square	area_cultivar
2023-08-17	stadtpark	11	X Storchschnabel		afternoon			5199840	2763994	53.1554
2023-08-17	stadtpark	11	X Storchschnabel		afternoon
2023-08-17	stadtpark	11	X Storchschnabel		afternoon		area square	1	5199840
2023-08-17	stadtpark	11	X Storchschnabel		afternoon		area cultivar	2	2763994
2023-08-17	stadtpark	11	X Storchschnabel		afternoon		area cultivar		0
2023-08-17	stadtpark	11	X Storchschnabel		afternoon		area cultivar		0
2023-08-17	stadtpark	11	X Storchschnabel		afternoon		area cultivar		0
2023-08-17	stadtpark	11	X Storchschnabel		afternoon		area cultivar		0
2023-08-17	stadtpark	11	X Storchschnabel		afternoon		area cultivar		0
2023-08-17	stadtpark	11	X Storchschnabel		afternoon		area cultivar		0
2023-08-17	stadtpark	11	X Storchschnabel		afternoon		area cultivar		0
2023-08-17	stadtpark	11	X Storchschnabel		afternoon		area cultivar		0
2023-08-17	stadtpark	11	X Storchschnabel		afternoon		area cultivar		0
2023-08-17	stadtpark	12	Katzenminze		afternoon			square	area_cultivar
2023-08-17	stadtpark	12	Katzenminze		afternoon			6466336	6466336	100
2023-08-17	stadtpark	12	Katzenminze		afternoon
2023-08-17	stadtpark	12	Katzenminze		afternoon		area square	1	6466336
2023-08-17	stadtpark	12	Katzenminze		afternoon		area cultivar	2	6466336
2023-08-17	stadtpark	12	Katzenminze		afternoon		area cultivar		0
2023-08-17	stadtpark	12	Katzenminze		afternoon		area cultivar		0
2023-08-17	stadtpark	12	Katzenminze		afternoon		area cultivar		0
2023-08-17	stadtpark	12	Katzenminze		afternoon		area cultivar		0
2023-08-17	stadtpark	12	Katzenminze		afternoon		area cultivar		0
2023-08-17	stadtpark	12	Katzenminze		afternoon		area cultivar		0
2023-08-17	stadtpark	12	Katzenminze		afternoon		area cultivar		0
2023-08-17	stadtpark	12	Katzenminze		afternoon		area cultivar		0
2023-08-17	stadtpark	12	Katzenminze		afternoon		area cultivar		0
2023-08-17	stadtpark	13	Kerzenknöterich		afternoon			square	area_cultivar
2023-08-17	stadtpark	13	Kerzenknöterich		afternoon			5022336	5022336	100
2023-08-17	stadtpark	13	Kerzenknöterich		afternoon
2023-08-17	stadtpark	13	Kerzenknöterich		afternoon		area square	1	5022336
2023-08-17	stadtpark	13	Kerzenknöterich		afternoon		area cultivar	2	5022336
2023-08-17	stadtpark	13	Kerzenknöterich		afternoon		area cultivar		0
2023-08-17	stadtpark	13	Kerzenknöterich		afternoon		area cultivar		0
2023-08-17	stadtpark	13	Kerzenknöterich		afternoon		area cultivar		0
2023-08-17	stadtpark	13	Kerzenknöterich		afternoon		area cultivar		0
2023-08-17	stadtpark	13	Kerzenknöterich		afternoon		area cultivar		0
2023-08-17	stadtpark	13	Kerzenknöterich		afternoon		area cultivar		0
2023-08-17	stadtpark	13	Kerzenknöterich		afternoon		area cultivar		0
2023-08-17	stadtpark	13	Kerzenknöterich		afternoon		area cultivar		0
2023-08-17	stadtpark	13	Kerzenknöterich		afternoon		area cultivar		0
2023-08-17	stadtpark	14	X Sonnenhut		afternoon			square	area_cultivar
2023-08-17	stadtpark	14	X Sonnenhut		afternoon			4808032	3421486	71.1619
2023-08-17	stadtpark	14	X Sonnenhut		afternoon
2023-08-17	stadtpark	14	X Sonnenhut		afternoon		area square	1	4808032
2023-08-17	stadtpark	14	X Sonnenhut		afternoon		area cultivar	2	3421486
2023-08-17	stadtpark	14	X Sonnenhut		afternoon		area cultivar		0
2023-08-17	stadtpark	14	X Sonnenhut		afternoon		area cultivar		0
2023-08-17	stadtpark	14	X Sonnenhut		afternoon		area cultivar		0
2023-08-17	stadtpark	14	X Sonnenhut		afternoon		area cultivar		0
2023-08-17	stadtpark	14	X Sonnenhut		afternoon		area cultivar		0
2023-08-17	stadtpark	14	X Sonnenhut		afternoon		area cultivar		0
2023-08-17	stadtpark	14	X Sonnenhut		afternoon		area cultivar		0
2023-08-17	stadtpark	14	X Sonnenhut		afternoon		area cultivar		0
2023-08-17	stadtpark	14	X Sonnenhut		afternoon		area cultivar		0
2023-08-17	stadtpark	15	X Storchschnabel		afternoon			square	area_cultivar
2023-08-17	stadtpark	15	X Storchschnabel		afternoon			6849216	5626830	82.1529
2023-08-17	stadtpark	15	X Storchschnabel		afternoon
2023-08-17	stadtpark	15	X Storchschnabel		afternoon		area square	1	6849216
2023-08-17	stadtpark	15	X Storchschnabel		afternoon		area cultivar	2	5626830
2023-08-17	stadtpark	15	X Storchschnabel		afternoon		area cultivar		0
2023-08-17	stadtpark	15	X Storchschnabel		afternoon		area cultivar		0
2023-08-17	stadtpark	15	X Storchschnabel		afternoon		area cultivar		0
2023-08-17	stadtpark	15	X Storchschnabel		afternoon		area cultivar		0
2023-08-17	stadtpark	15	X Storchschnabel		afternoon		area cultivar		0
2023-08-17	stadtpark	15	X Storchschnabel		afternoon		area cultivar		0
2023-08-17	stadtpark	15	X Storchschnabel		afternoon		area cultivar		0
2023-08-17	stadtpark	15	X Storchschnabel		afternoon		area cultivar		0
2023-08-17	stadtpark	15	X Storchschnabel		afternoon		area cultivar		0
2023-08-17	stadtpark	16	Mehliger Salbei		afternoon			square	area_cultivar
2023-08-17	stadtpark	16	Mehliger Salbei		afternoon			4725120	4725120	100
2023-08-17	stadtpark	16	Mehliger Salbei		afternoon
2023-08-17	stadtpark	16	Mehliger Salbei		afternoon		area square	1	4725120
2023-08-17	stadtpark	16	Mehliger Salbei		afternoon		area cultivar	2	4725120
2023-08-17	stadtpark	16	Mehliger Salbei		afternoon		area cultivar		0
2023-08-17	stadtpark	16	Mehliger Salbei		afternoon		area cultivar		0
2023-08-17	stadtpark	16	Mehliger Salbei		afternoon		area cultivar		0
2023-08-17	stadtpark	16	Mehliger Salbei		afternoon		area cultivar		0
2023-08-17	stadtpark	16	Mehliger Salbei		afternoon		area cultivar		0
2023-08-17	stadtpark	16	Mehliger Salbei		afternoon		area cultivar		0
2023-08-17	stadtpark	16	Mehliger Salbei		afternoon		area cultivar		0
2023-08-17	stadtpark	16	Mehliger Salbei		afternoon		area cultivar		0
2023-08-17	stadtpark	16	Mehliger Salbei		afternoon		area cultivar		0
2023-08-17	stadtpark	17	Spinnenblume		afternoon			square	area_cultivar
2023-08-17	stadtpark	17	Spinnenblume		afternoon			2516800	2516800	100
2023-08-17	stadtpark	17	Spinnenblume		afternoon
2023-08-17	stadtpark	17	Spinnenblume		afternoon		area square	1	2516800
2023-08-17	stadtpark	17	Spinnenblume		afternoon		area cultivar	2	2516800
2023-08-17	stadtpark	17	Spinnenblume		afternoon		area cultivar		0
2023-08-17	stadtpark	17	Spinnenblume		afternoon		area cultivar		0
2023-08-17	stadtpark	17	Spinnenblume		afternoon		area cultivar		0
2023-08-17	stadtpark	17	Spinnenblume		afternoon		area cultivar		0
2023-08-17	stadtpark	17	Spinnenblume		afternoon		area cultivar		0
2023-08-17	stadtpark	17	Spinnenblume		afternoon		area cultivar		0
2023-08-17	stadtpark	17	Spinnenblume		afternoon		area cultivar		0
2023-08-17	stadtpark	17	Spinnenblume		afternoon		area cultivar		0
2023-08-17	stadtpark	17	Spinnenblume		afternoon		area cultivar		0
2023-08-17	stadtpark	18	Lilien gelb		afternoon			square	area_cultivar
2023-08-17	stadtpark	18	Lilien gelb		afternoon			2705947	2623712	96.961
2023-08-17	stadtpark	18	Lilien gelb		afternoon
2023-08-17	stadtpark	18	Lilien gelb		afternoon		area square	1	2705947
2023-08-17	stadtpark	18	Lilien gelb		afternoon		area cultivar	2	2623712
2023-08-17	stadtpark	18	Lilien gelb		afternoon		area cultivar		0
2023-08-17	stadtpark	18	Lilien gelb		afternoon		area cultivar		0
2023-08-17	stadtpark	18	Lilien gelb		afternoon		area cultivar		0
2023-08-17	stadtpark	18	Lilien gelb		afternoon		area cultivar		0
2023-08-17	stadtpark	18	Lilien gelb		afternoon		area cultivar		0
2023-08-17	stadtpark	18	Lilien gelb		afternoon		area cultivar		0
2023-08-17	stadtpark	18	Lilien gelb		afternoon		area cultivar		0
2023-08-17	stadtpark	18	Lilien gelb		afternoon		area cultivar		0
2023-08-17	stadtpark	18	Lilien gelb		afternoon		area cultivar		0
2023-08-17	stadtpark	19	Begonien weiß		afternoon			square	area_cultivar
2023-08-17	stadtpark	19	Begonien weiß		afternoon			6793488	3524487	51.8804
2023-08-17	stadtpark	19	Begonien weiß		afternoon
2023-08-17	stadtpark	19	Begonien weiß		afternoon		area square	1	6793488
2023-08-17	stadtpark	19	Begonien weiß		afternoon		area cultivar	2	3524487
2023-08-17	stadtpark	19	Begonien weiß		afternoon		area cultivar		0
2023-08-17	stadtpark	19	Begonien weiß		afternoon		area cultivar		0
2023-08-17	stadtpark	19	Begonien weiß		afternoon		area cultivar		0
2023-08-17	stadtpark	19	Begonien weiß		afternoon		area cultivar		0
2023-08-17	stadtpark	19	Begonien weiß		afternoon		area cultivar		0
2023-08-17	stadtpark	19	Begonien weiß		afternoon		area cultivar		0
2023-08-17	stadtpark	19	Begonien weiß		afternoon		area cultivar		0
2023-08-17	stadtpark	19	Begonien weiß		afternoon		area cultivar		0
2023-08-17	stadtpark	19	Begonien weiß		afternoon		area cultivar		0
2023-08-17	stadtpark	20	Herbst-Anemone		afternoon			square	area_cultivar
2023-08-17	stadtpark	20	Herbst-Anemone		afternoon			2731040	2078857	76.1196
2023-08-17	stadtpark	20	Herbst-Anemone		afternoon
2023-08-17	stadtpark	20	Herbst-Anemone		afternoon		area square	1	2731040
2023-08-17	stadtpark	20	Herbst-Anemone		afternoon		area cultivar	2	2078857
2023-08-17	stadtpark	20	Herbst-Anemone		afternoon		area cultivar		0
2023-08-17	stadtpark	20	Herbst-Anemone		afternoon		area cultivar		0
2023-08-17	stadtpark	20	Herbst-Anemone		afternoon		area cultivar		0
2023-08-17	stadtpark	20	Herbst-Anemone		afternoon		area cultivar		0
2023-08-17	stadtpark	20	Herbst-Anemone		afternoon		area cultivar		0
2023-08-17	stadtpark	20	Herbst-Anemone		afternoon		area cultivar		0
2023-08-17	stadtpark	20	Herbst-Anemone		afternoon		area cultivar		0
2023-08-17	stadtpark	20	Herbst-Anemone		afternoon		area cultivar		0
2023-08-17	stadtpark	20	Herbst-Anemone		afternoon		area cultivar		0
2023-08-17	stadtpark	21	Blauraute		afternoon			square	area_cultivar
2023-08-17	stadtpark	21	Blauraute		afternoon			6950720	3045620	43.8173
2023-08-17	stadtpark	21	Blauraute		afternoon
2023-08-17	stadtpark	21	Blauraute		afternoon		area square	1	6950720
2023-08-17	stadtpark	21	Blauraute		afternoon		area cultivar	2	3045620
2023-08-17	stadtpark	21	Blauraute		afternoon		area cultivar		0
2023-08-17	stadtpark	21	Blauraute		afternoon		area cultivar		0
2023-08-17	stadtpark	21	Blauraute		afternoon		area cultivar		0
2023-08-17	stadtpark	21	Blauraute		afternoon		area cultivar		0
2023-08-17	stadtpark	21	Blauraute		afternoon		area cultivar		0
2023-08-17	stadtpark	21	Blauraute		afternoon		area cultivar		0
2023-08-17	stadtpark	21	Blauraute		afternoon		area cultivar		0
2023-08-17	stadtpark	21	Blauraute		afternoon		area cultivar		0
2023-08-17	stadtpark	21	Blauraute		afternoon		area cultivar		0
2023-08-17	stadtpark	22	X Storchschnabel		afternoon			square	area_cultivar
2023-08-17	stadtpark	22	X Storchschnabel		afternoon			6326848	4604756	72.7812
2023-08-17	stadtpark	22	X Storchschnabel		afternoon
2023-08-17	stadtpark	22	X Storchschnabel		afternoon		area square	1	6326848
2023-08-17	stadtpark	22	X Storchschnabel		afternoon		area cultivar	2	4604756
2023-08-17	stadtpark	22	X Storchschnabel		afternoon		area cultivar		0
2023-08-17	stadtpark	22	X Storchschnabel		afternoon		area cultivar		0
2023-08-17	stadtpark	22	X Storchschnabel		afternoon		area cultivar		0
2023-08-17	stadtpark	22	X Storchschnabel		afternoon		area cultivar		0
2023-08-17	stadtpark	22	X Storchschnabel		afternoon		area cultivar		0
2023-08-17	stadtpark	22	X Storchschnabel		afternoon		area cultivar		0
2023-08-17	stadtpark	22	X Storchschnabel		afternoon		area cultivar		0
2023-08-17	stadtpark	22	X Storchschnabel		afternoon		area cultivar		0
2023-08-17	stadtpark	22	X Storchschnabel		afternoon		area cultivar		0
2023-08-17	stadtpark	23	X Sonnenhut		afternoon			square	area_cultivar
2023-08-17	stadtpark	23	X Sonnenhut		afternoon			4657760	4657760	100
2023-08-17	stadtpark	23	X Sonnenhut		afternoon
2023-08-17	stadtpark	23	X Sonnenhut		afternoon		area square	1	4657760
2023-08-17	stadtpark	23	X Sonnenhut		afternoon		area cultivar	2	4657760
2023-08-17	stadtpark	23	X Sonnenhut		afternoon		area cultivar		0
2023-08-17	stadtpark	23	X Sonnenhut		afternoon		area cultivar		0
2023-08-17	stadtpark	23	X Sonnenhut		afternoon		area cultivar		0
2023-08-17	stadtpark	23	X Sonnenhut		afternoon		area cultivar		0
2023-08-17	stadtpark	23	X Sonnenhut		afternoon		area cultivar		0
2023-08-17	stadtpark	23	X Sonnenhut		afternoon		area cultivar		0
2023-08-17	stadtpark	23	X Sonnenhut		afternoon		area cultivar		0
2023-08-17	stadtpark	23	X Sonnenhut		afternoon		area cultivar		0
2023-08-17	stadtpark	23	X Sonnenhut		afternoon		area cultivar		0
2023-08-17	stadtpark	24	Edeldistel ?		afternoon			square	area_cultivar
2023-08-17	stadtpark	24	Edeldistel ?		afternoon			6234624	2930250	46.9996
2023-08-17	stadtpark	24	Edeldistel ?		afternoon
2023-08-17	stadtpark	24	Edeldistel ?		afternoon		area square	1	6234624
2023-08-17	stadtpark	24	Edeldistel ?		afternoon		area cultivar	2	1164242
2023-08-17	stadtpark	24	Edeldistel ?		afternoon		area cultivar	3	1766008
2023-08-17	stadtpark	24	Edeldistel ?		afternoon		area cultivar		0
2023-08-17	stadtpark	24	Edeldistel ?		afternoon		area cultivar		0
2023-08-17	stadtpark	24	Edeldistel ?		afternoon		area cultivar		0
2023-08-17	stadtpark	24	Edeldistel ?		afternoon		area cultivar		0
2023-08-17	stadtpark	24	Edeldistel ?		afternoon		area cultivar		0
2023-08-17	stadtpark	24	Edeldistel ?		afternoon		area cultivar		0
2023-08-17	stadtpark	24	Edeldistel ?		afternoon		area cultivar		0
2023-08-17	stadtpark	24	Edeldistel ?		afternoon		area cultivar		0
2023-08-17	stadtpark	25	Pur Pur Sonnenhut		afternoon			square	area_cultivar
2023-08-17	stadtpark	25	Pur Pur Sonnenhut		afternoon			5424672	5101589	94.0442
2023-08-17	stadtpark	25	Pur Pur Sonnenhut		afternoon
2023-08-17	stadtpark	25	Pur Pur Sonnenhut		afternoon		area square	1	5424672
2023-08-17	stadtpark	25	Pur Pur Sonnenhut		afternoon		area cultivar	2	5101589
2023-08-17	stadtpark	25	Pur Pur Sonnenhut		afternoon		area cultivar		0
2023-08-17	stadtpark	25	Pur Pur Sonnenhut		afternoon		area cultivar		0
2023-08-17	stadtpark	25	Pur Pur Sonnenhut		afternoon		area cultivar		0
2023-08-17	stadtpark	25	Pur Pur Sonnenhut		afternoon		area cultivar		0
2023-08-17	stadtpark	25	Pur Pur Sonnenhut		afternoon		area cultivar		0
2023-08-17	stadtpark	25	Pur Pur Sonnenhut		afternoon		area cultivar		0
2023-08-17	stadtpark	25	Pur Pur Sonnenhut		afternoon		area cultivar		0
2023-08-17	stadtpark	25	Pur Pur Sonnenhut		afternoon		area cultivar		0
2023-08-17	stadtpark	25	Pur Pur Sonnenhut		afternoon		area cultivar		0
2023-08-17	stadtpark	26	X Storchschnabel		afternoon			square	area_cultivar
2023-08-17	stadtpark	26	X Storchschnabel		afternoon			6011712	3793715	63.1054
2023-08-17	stadtpark	26	X Storchschnabel		afternoon
2023-08-17	stadtpark	26	X Storchschnabel		afternoon		area square	1	6011712
2023-08-17	stadtpark	26	X Storchschnabel		afternoon		area cultivar	2	3793715
2023-08-17	stadtpark	26	X Storchschnabel		afternoon		area cultivar		0
2023-08-17	stadtpark	26	X Storchschnabel		afternoon		area cultivar		0
2023-08-17	stadtpark	26	X Storchschnabel		afternoon		area cultivar		0
2023-08-17	stadtpark	26	X Storchschnabel		afternoon		area cultivar		0
2023-08-17	stadtpark	26	X Storchschnabel		afternoon		area cultivar		0
2023-08-17	stadtpark	26	X Storchschnabel		afternoon		area cultivar		0
2023-08-17	stadtpark	26	X Storchschnabel		afternoon		area cultivar		0
2023-08-17	stadtpark	26	X Storchschnabel		afternoon		area cultivar		0
2023-08-17	stadtpark	26	X Storchschnabel		afternoon		area cultivar		0
2023-08-17	bismarckplatz	27	Herbst-Anemone		afternoon			square	area_cultivar
2023-08-17	bismarckplatz	27	Herbst-Anemone		afternoon			5272992	3652631	69.2706
2023-08-17	bismarckplatz	27	Herbst-Anemone		afternoon
2023-08-17	bismarckplatz	27	Herbst-Anemone		afternoon		area square	1	5272992
2023-08-17	bismarckplatz	27	Herbst-Anemone		afternoon		area cultivar	2	3652631
2023-08-17	bismarckplatz	27	Herbst-Anemone		afternoon		area cultivar		0
2023-08-17	bismarckplatz	27	Herbst-Anemone		afternoon		area cultivar		0
2023-08-17	bismarckplatz	27	Herbst-Anemone		afternoon		area cultivar		0
2023-08-17	bismarckplatz	27	Herbst-Anemone		afternoon		area cultivar		0
2023-08-17	bismarckplatz	27	Herbst-Anemone		afternoon		area cultivar		0
2023-08-17	bismarckplatz	27	Herbst-Anemone		afternoon		area cultivar		0
2023-08-17	bismarckplatz	27	Herbst-Anemone		afternoon		area cultivar		0
2023-08-17	bismarckplatz	27	Herbst-Anemone		afternoon		area cultivar		0
2023-08-17	bismarckplatz	27	Herbst-Anemone		afternoon		area cultivar		0
2023-08-17	bismarckplatz	28	X Storchschnabel		afternoon			square	area_cultivar
2023-08-17	bismarckplatz	28	X Storchschnabel		afternoon			4935600	4935600	100
2023-08-17	bismarckplatz	28	X Storchschnabel		afternoon
2023-08-17	bismarckplatz	28	X Storchschnabel		afternoon		area square	1	4935600
2023-08-17	bismarckplatz	28	X Storchschnabel		afternoon		area cultivar	2	4935600
2023-08-17	bismarckplatz	28	X Storchschnabel		afternoon		area cultivar		0
2023-08-17	bismarckplatz	28	X Storchschnabel		afternoon		area cultivar		0
2023-08-17	bismarckplatz	28	X Storchschnabel		afternoon		area cultivar		0
2023-08-17	bismarckplatz	28	X Storchschnabel		afternoon		area cultivar		0
2023-08-17	bismarckplatz	28	X Storchschnabel		afternoon		area cultivar		0
2023-08-17	bismarckplatz	28	X Storchschnabel		afternoon		area cultivar		0
2023-08-17	bismarckplatz	28	X Storchschnabel		afternoon		area cultivar		0
2023-08-17	bismarckplatz	28	X Storchschnabel		afternoon		area cultivar		0
2023-08-17	bismarckplatz	28	X Storchschnabel		afternoon		area cultivar		0
2023-08-17	bismarckplatz	29	Pur Pur Sonnenhut		afternoon			square	area_cultivar
2023-08-17	bismarckplatz	29	Pur Pur Sonnenhut		afternoon			5173760	2718808	52.5499
2023-08-17	bismarckplatz	29	Pur Pur Sonnenhut		afternoon
2023-08-17	bismarckplatz	29	Pur Pur Sonnenhut		afternoon		area square	1	5173760
2023-08-17	bismarckplatz	29	Pur Pur Sonnenhut		afternoon		area cultivar	2	2718808
2023-08-17	bismarckplatz	29	Pur Pur Sonnenhut		afternoon		area cultivar		0
2023-08-17	bismarckplatz	29	Pur Pur Sonnenhut		afternoon		area cultivar		0
2023-08-17	bismarckplatz	29	Pur Pur Sonnenhut		afternoon		area cultivar		0
2023-08-17	bismarckplatz	29	Pur Pur Sonnenhut		afternoon		area cultivar		0
2023-08-17	bismarckplatz	29	Pur Pur Sonnenhut		afternoon		area cultivar		0
2023-08-17	bismarckplatz	29	Pur Pur Sonnenhut		afternoon		area cultivar		0
2023-08-17	bismarckplatz	29	Pur Pur Sonnenhut		afternoon		area cultivar		0
2023-08-17	bismarckplatz	29	Pur Pur Sonnenhut		afternoon		area cultivar		0
2023-08-17	bismarckplatz	29	Pur Pur Sonnenhut		afternoon		area cultivar		0
2023-08-18	kneippbecken	1	X Sonnenhut		morning			square	area_cultivar
2023-08-18	kneippbecken	1	X Sonnenhut		morning			4702880	4702880	100
2023-08-18	kneippbecken	1	X Sonnenhut		morning
2023-08-18	kneippbecken	1	X Sonnenhut		morning		area square	1	4702880
2023-08-18	kneippbecken	1	X Sonnenhut		morning		area cultivar	2	4702880
2023-08-18	kneippbecken	1	X Sonnenhut		morning		area cultivar		0
2023-08-18	kneippbecken	1	X Sonnenhut		morning		area cultivar		0
2023-08-18	kneippbecken	1	X Sonnenhut		morning		area cultivar		0
2023-08-18	kneippbecken	1	X Sonnenhut		morning		area cultivar		0
2023-08-18	kneippbecken	1	X Sonnenhut		morning		area cultivar		0
2023-08-18	kneippbecken	1	X Sonnenhut		morning		area cultivar		0
2023-08-18	kneippbecken	1	X Sonnenhut		morning		area cultivar		0
2023-08-18	kneippbecken	1	X Sonnenhut		morning		area cultivar		0
2023-08-18	kneippbecken	1	X Sonnenhut		morning		area cultivar		0
2023-08-18	kneippbecken	2	Kerzenknöterich		morning			square	area_cultivar
2023-08-18	kneippbecken	2	Kerzenknöterich		morning			4852800	4852800	100
2023-08-18	kneippbecken	2	Kerzenknöterich		morning
2023-08-18	kneippbecken	2	Kerzenknöterich		morning		area square	1	4852800
2023-08-18	kneippbecken	2	Kerzenknöterich		morning		area cultivar	2	4852800
2023-08-18	kneippbecken	2	Kerzenknöterich		morning		area cultivar		0
2023-08-18	kneippbecken	2	Kerzenknöterich		morning		area cultivar		0
2023-08-18	kneippbecken	2	Kerzenknöterich		morning		area cultivar		0
2023-08-18	kneippbecken	2	Kerzenknöterich		morning		area cultivar		0
2023-08-18	kneippbecken	2	Kerzenknöterich		morning		area cultivar		0
2023-08-18	kneippbecken	2	Kerzenknöterich		morning		area cultivar		0
2023-08-18	kneippbecken	2	Kerzenknöterich		morning		area cultivar		0
2023-08-18	kneippbecken	2	Kerzenknöterich		morning		area cultivar		0
2023-08-18	kneippbecken	2	Kerzenknöterich		morning		area cultivar		0
2023-08-18	kneippbecken	3	Phlox		morning			square	area_cultivar
2023-08-18	kneippbecken	3	Phlox		morning			7584736	6695115	88.2709
2023-08-18	kneippbecken	3	Phlox		morning
2023-08-18	kneippbecken	3	Phlox		morning		area square	1	7584736
2023-08-18	kneippbecken	3	Phlox		morning		area cultivar	2	6695115
2023-08-18	kneippbecken	3	Phlox		morning		area cultivar		0
2023-08-18	kneippbecken	3	Phlox		morning		area cultivar		0
2023-08-18	kneippbecken	3	Phlox		morning		area cultivar		0
2023-08-18	kneippbecken	3	Phlox		morning		area cultivar		0
2023-08-18	kneippbecken	3	Phlox		morning		area cultivar		0
2023-08-18	kneippbecken	3	Phlox		morning		area cultivar		0
2023-08-18	kneippbecken	3	Phlox		morning		area cultivar		0
2023-08-18	kneippbecken	3	Phlox		morning		area cultivar		0
2023-08-18	kneippbecken	3	Phlox		morning		area cultivar		0
2023-08-18	kneippbecken	4	Flachblatt-Edeldistel		morning			square	area_cultivar
2023-08-18	kneippbecken	4	Flachblatt-Edeldistel		morning			6331712	1290380	20.3796
2023-08-18	kneippbecken	4	Flachblatt-Edeldistel		morning
2023-08-18	kneippbecken	4	Flachblatt-Edeldistel		morning		area square	1	6331712
2023-08-18	kneippbecken	4	Flachblatt-Edeldistel		morning		area cultivar	2	1290380
2023-08-18	kneippbecken	4	Flachblatt-Edeldistel		morning		area cultivar		0
2023-08-18	kneippbecken	4	Flachblatt-Edeldistel		morning		area cultivar		0
2023-08-18	kneippbecken	4	Flachblatt-Edeldistel		morning		area cultivar		0
2023-08-18	kneippbecken	4	Flachblatt-Edeldistel		morning		area cultivar		0
2023-08-18	kneippbecken	4	Flachblatt-Edeldistel		morning		area cultivar		0
2023-08-18	kneippbecken	4	Flachblatt-Edeldistel		morning		area cultivar		0
2023-08-18	kneippbecken	4	Flachblatt-Edeldistel		morning		area cultivar		0
2023-08-18	kneippbecken	4	Flachblatt-Edeldistel		morning		area cultivar		0
2023-08-18	kneippbecken	4	Flachblatt-Edeldistel		morning		area cultivar		0
2023-08-18	kneippbecken	5	Feinstrahl		morning			square	area_cultivar
2023-08-18	kneippbecken	5	Feinstrahl		morning			4183424	3107970	74.2925
2023-08-18	kneippbecken	5	Feinstrahl		morning
2023-08-18	kneippbecken	5	Feinstrahl		morning		area square	1	4183424
2023-08-18	kneippbecken	5	Feinstrahl		morning		area cultivar	2	2027264
2023-08-18	kneippbecken	5	Feinstrahl		morning		area cultivar	3	1080706
2023-08-18	kneippbecken	5	Feinstrahl		morning		area cultivar		0
2023-08-18	kneippbecken	5	Feinstrahl		morning		area cultivar		0
2023-08-18	kneippbecken	5	Feinstrahl		morning		area cultivar		0
2023-08-18	kneippbecken	5	Feinstrahl		morning		area cultivar		0
2023-08-18	kneippbecken	5	Feinstrahl		morning		area cultivar		0
2023-08-18	kneippbecken	5	Feinstrahl		morning		area cultivar		0
2023-08-18	kneippbecken	5	Feinstrahl		morning		area cultivar		0
2023-08-18	kneippbecken	5	Feinstrahl		morning		area cultivar		0
2023-08-18	kneippbecken	6	Salvien rot		morning			square	area_cultivar
2023-08-18	kneippbecken	6	Salvien rot		morning			5423760	4392561	80.9874
2023-08-18	kneippbecken	6	Salvien rot		morning
2023-08-18	kneippbecken	6	Salvien rot		morning		area square	1	5423760
2023-08-18	kneippbecken	6	Salvien rot		morning		area cultivar	2	4392561
2023-08-18	kneippbecken	6	Salvien rot		morning		area cultivar		0
2023-08-18	kneippbecken	6	Salvien rot		morning		area cultivar		0
2023-08-18	kneippbecken	6	Salvien rot		morning		area cultivar		0
2023-08-18	kneippbecken	6	Salvien rot		morning		area cultivar		0
2023-08-18	kneippbecken	6	Salvien rot		morning		area cultivar		0
2023-08-18	kneippbecken	6	Salvien rot		morning		area cultivar		0
2023-08-18	kneippbecken	6	Salvien rot		morning		area cultivar		0
2023-08-18	kneippbecken	6	Salvien rot		morning		area cultivar		0
2023-08-18	kneippbecken	6	Salvien rot		morning		area cultivar		0
2023-08-18	kneippbecken	7	Feinstrahl		morning			square	area_cultivar
2023-08-18	kneippbecken	7	Feinstrahl		morning			6737024	4974668	73.8407
2023-08-18	kneippbecken	7	Feinstrahl		morning
2023-08-18	kneippbecken	7	Feinstrahl		morning		area square	1	6737024
2023-08-18	kneippbecken	7	Feinstrahl		morning		area cultivar	2	4974668
2023-08-18	kneippbecken	7	Feinstrahl		morning		area cultivar		0
2023-08-18	kneippbecken	7	Feinstrahl		morning		area cultivar		0
2023-08-18	kneippbecken	7	Feinstrahl		morning		area cultivar		0
2023-08-18	kneippbecken	7	Feinstrahl		morning		area cultivar		0
2023-08-18	kneippbecken	7	Feinstrahl		morning		area cultivar		0
2023-08-18	kneippbecken	7	Feinstrahl		morning		area cultivar		0
2023-08-18	kneippbecken	7	Feinstrahl		morning		area cultivar		0
2023-08-18	kneippbecken	7	Feinstrahl		morning		area cultivar		0
2023-08-18	kneippbecken	7	Feinstrahl		morning		area cultivar		0
2023-08-18	kneippbecken	8	Stockrose		morning			square	area_cultivar
2023-08-18	kneippbecken	8	Stockrose		morning			5406336	3672621	67.9318
2023-08-18	kneippbecken	8	Stockrose		morning
2023-08-18	kneippbecken	8	Stockrose		morning		area square	1	5406336
2023-08-18	kneippbecken	8	Stockrose		morning		area cultivar	2	3672621
2023-08-18	kneippbecken	8	Stockrose		morning		area cultivar		0
2023-08-18	kneippbecken	8	Stockrose		morning		area cultivar		0
2023-08-18	kneippbecken	8	Stockrose		morning		area cultivar		0
2023-08-18	kneippbecken	8	Stockrose		morning		area cultivar		0
2023-08-18	kneippbecken	8	Stockrose		morning		area cultivar		0
2023-08-18	kneippbecken	8	Stockrose		morning		area cultivar		0
2023-08-18	kneippbecken	8	Stockrose		morning		area cultivar		0
2023-08-18	kneippbecken	8	Stockrose		morning		area cultivar		0
2023-08-18	kneippbecken	8	Stockrose		morning		area cultivar		0
2023-08-18	kneippbecken	9	Salvien lila		morning			square	area_cultivar
2023-08-18	kneippbecken	9	Salvien lila		morning			6556797	4709261	71.8226
2023-08-18	kneippbecken	9	Salvien lila		morning
2023-08-18	kneippbecken	9	Salvien lila		morning		area square	1	6556797
2023-08-18	kneippbecken	9	Salvien lila		morning		area cultivar	2	4709261
2023-08-18	kneippbecken	9	Salvien lila		morning		area cultivar		0
2023-08-18	kneippbecken	9	Salvien lila		morning		area cultivar		0
2023-08-18	kneippbecken	9	Salvien lila		morning		area cultivar		0
2023-08-18	kneippbecken	9	Salvien lila		morning		area cultivar		0
2023-08-18	kneippbecken	9	Salvien lila		morning		area cultivar		0
2023-08-18	kneippbecken	9	Salvien lila		morning		area cultivar		0
2023-08-18	kneippbecken	9	Salvien lila		morning		area cultivar		0
2023-08-18	kneippbecken	9	Salvien lila		morning		area cultivar		0
2023-08-18	kneippbecken	9	Salvien lila		morning		area cultivar		0
2023-08-18	kneippbecken	10	Salvien weiß		morning			square	area_cultivar
2023-08-18	kneippbecken	10	Salvien weiß		morning			4889200	3773140	77.173
2023-08-18	kneippbecken	10	Salvien weiß		morning
2023-08-18	kneippbecken	10	Salvien weiß		morning		area square	1	4889200
2023-08-18	kneippbecken	10	Salvien weiß		morning		area cultivar	2	3773140
2023-08-18	kneippbecken	10	Salvien weiß		morning		area cultivar		0
2023-08-18	kneippbecken	10	Salvien weiß		morning		area cultivar		0
2023-08-18	kneippbecken	10	Salvien weiß		morning		area cultivar		0
2023-08-18	kneippbecken	10	Salvien weiß		morning		area cultivar		0
2023-08-18	kneippbecken	10	Salvien weiß		morning		area cultivar		0
2023-08-18	kneippbecken	10	Salvien weiß		morning		area cultivar		0
2023-08-18	kneippbecken	10	Salvien weiß		morning		area cultivar		0
2023-08-18	kneippbecken	10	Salvien weiß		morning		area cultivar		0
2023-08-18	kneippbecken	10	Salvien weiß		morning		area cultivar		0
2023-08-18	kneippbecken	11	Studentenblumen gelb		morning			square	area_cultivar
2023-08-18	kneippbecken	11	Studentenblumen gelb		morning			5907232	5243750	88.7683
2023-08-18	kneippbecken	11	Studentenblumen gelb		morning
2023-08-18	kneippbecken	11	Studentenblumen gelb		morning		area square	1	5907232
2023-08-18	kneippbecken	11	Studentenblumen gelb		morning		area cultivar	2	5243750
2023-08-18	kneippbecken	11	Studentenblumen gelb		morning		area cultivar		0
2023-08-18	kneippbecken	11	Studentenblumen gelb		morning		area cultivar		0
2023-08-18	kneippbecken	11	Studentenblumen gelb		morning		area cultivar		0
2023-08-18	kneippbecken	11	Studentenblumen gelb		morning		area cultivar		0
2023-08-18	kneippbecken	11	Studentenblumen gelb		morning		area cultivar		0
2023-08-18	kneippbecken	11	Studentenblumen gelb		morning		area cultivar		0
2023-08-18	kneippbecken	11	Studentenblumen gelb		morning		area cultivar		0
2023-08-18	kneippbecken	11	Studentenblumen gelb		morning		area cultivar		0
2023-08-18	kneippbecken	11	Studentenblumen gelb		morning		area cultivar		0
2023-08-18	kneippbecken	12	Studentenblumen orange		morning			square	area_cultivar
2023-08-18	kneippbecken	12	Studentenblumen orange		morning			5159680	4028548	78.0775
2023-08-18	kneippbecken	12	Studentenblumen orange		morning
2023-08-18	kneippbecken	12	Studentenblumen orange		morning		area square	1	5159680
2023-08-18	kneippbecken	12	Studentenblumen orange		morning		area cultivar	2	4028548
2023-08-18	kneippbecken	12	Studentenblumen orange		morning		area cultivar		0
2023-08-18	kneippbecken	12	Studentenblumen orange		morning		area cultivar		0
2023-08-18	kneippbecken	12	Studentenblumen orange		morning		area cultivar		0
2023-08-18	kneippbecken	12	Studentenblumen orange		morning		area cultivar		0
2023-08-18	kneippbecken	12	Studentenblumen orange		morning		area cultivar		0
2023-08-18	kneippbecken	12	Studentenblumen orange		morning		area cultivar		0
2023-08-18	kneippbecken	12	Studentenblumen orange		morning		area cultivar		0
2023-08-18	kneippbecken	12	Studentenblumen orange		morning		area cultivar		0
2023-08-18	kneippbecken	12	Studentenblumen orange		morning		area cultivar		0
2023-08-18	kneippbecken	13	Mehliger Salbei		morning			square	area_cultivar
2023-08-18	kneippbecken	13	Mehliger Salbei		morning			5176896	5176896	100
2023-08-18	kneippbecken	13	Mehliger Salbei		morning
2023-08-18	kneippbecken	13	Mehliger Salbei		morning		area square	1	5176896
2023-08-18	kneippbecken	13	Mehliger Salbei		morning		area cultivar	2	5176896
2023-08-18	kneippbecken	13	Mehliger Salbei		morning		area cultivar		0
2023-08-18	kneippbecken	13	Mehliger Salbei		morning		area cultivar		0
2023-08-18	kneippbecken	13	Mehliger Salbei		morning		area cultivar		0
2023-08-18	kneippbecken	13	Mehliger Salbei		morning		area cultivar		0
2023-08-18	kneippbecken	13	Mehliger Salbei		morning		area cultivar		0
2023-08-18	kneippbecken	13	Mehliger Salbei		morning		area cultivar		0
2023-08-18	kneippbecken	13	Mehliger Salbei		morning		area cultivar		0
2023-08-18	kneippbecken	13	Mehliger Salbei		morning		area cultivar		0
2023-08-18	kneippbecken	13	Mehliger Salbei		morning		area cultivar		0
2023-08-18	kneippbecken	14	Pur Pur Sonnenhut		morning			square	area_cultivar
2023-08-18	kneippbecken	14	Pur Pur Sonnenhut		morning			4401600	3121952	70.9277
2023-08-18	kneippbecken	14	Pur Pur Sonnenhut		morning
2023-08-18	kneippbecken	14	Pur Pur Sonnenhut		morning		area square	1	4401600
2023-08-18	kneippbecken	14	Pur Pur Sonnenhut		morning		area cultivar	2	3121952
2023-08-18	kneippbecken	14	Pur Pur Sonnenhut		morning		area cultivar		0
2023-08-18	kneippbecken	14	Pur Pur Sonnenhut		morning		area cultivar		0
2023-08-18	kneippbecken	14	Pur Pur Sonnenhut		morning		area cultivar		0
2023-08-18	kneippbecken	14	Pur Pur Sonnenhut		morning		area cultivar		0
2023-08-18	kneippbecken	14	Pur Pur Sonnenhut		morning		area cultivar		0
2023-08-18	kneippbecken	14	Pur Pur Sonnenhut		morning		area cultivar		0
2023-08-18	kneippbecken	14	Pur Pur Sonnenhut		morning		area cultivar		0
2023-08-18	kneippbecken	14	Pur Pur Sonnenhut		morning		area cultivar		0
2023-08-18	kneippbecken	14	Pur Pur Sonnenhut		morning		area cultivar		0
2023-08-18	kneippbecken	15	Katzenminze		morning			square	area_cultivar
2023-08-18	kneippbecken	15	Katzenminze		morning			4896000	4503088	91.9748
2023-08-18	kneippbecken	15	Katzenminze		morning
2023-08-18	kneippbecken	15	Katzenminze		morning		area square	1	4896000
2023-08-18	kneippbecken	15	Katzenminze		morning		area cultivar	2	4503088
2023-08-18	kneippbecken	15	Katzenminze		morning		area cultivar		0
2023-08-18	kneippbecken	15	Katzenminze		morning		area cultivar		0
2023-08-18	kneippbecken	15	Katzenminze		morning		area cultivar		0
2023-08-18	kneippbecken	15	Katzenminze		morning		area cultivar		0
2023-08-18	kneippbecken	15	Katzenminze		morning		area cultivar		0
2023-08-18	kneippbecken	15	Katzenminze		morning		area cultivar		0
2023-08-18	kneippbecken	15	Katzenminze		morning		area cultivar		0
2023-08-18	kneippbecken	15	Katzenminze		morning		area cultivar		0
2023-08-18	kneippbecken	15	Katzenminze		morning		area cultivar		0
2023-08-18	kneippbecken	16	Kerzenknöterich		morning			square	area_cultivar
2023-08-18	kneippbecken	16	Kerzenknöterich		morning			2301440	2301440	100
2023-08-18	kneippbecken	16	Kerzenknöterich		morning
2023-08-18	kneippbecken	16	Kerzenknöterich		morning		area square	1	2301440
2023-08-18	kneippbecken	16	Kerzenknöterich		morning		area cultivar	2	2301440
2023-08-18	kneippbecken	16	Kerzenknöterich		morning		area cultivar		0
2023-08-18	kneippbecken	16	Kerzenknöterich		morning		area cultivar		0
2023-08-18	kneippbecken	16	Kerzenknöterich		morning		area cultivar		0
2023-08-18	kneippbecken	16	Kerzenknöterich		morning		area cultivar		0
2023-08-18	kneippbecken	16	Kerzenknöterich		morning		area cultivar		0
2023-08-18	kneippbecken	16	Kerzenknöterich		morning		area cultivar		0
2023-08-18	kneippbecken	16	Kerzenknöterich		morning		area cultivar		0
2023-08-18	kneippbecken	16	Kerzenknöterich		morning		area cultivar		0
2023-08-18	kneippbecken	16	Kerzenknöterich		morning		area cultivar		0
2023-08-18	kneippbecken	17	große Fetthenne		morning			square	area_cultivar
2023-08-18	kneippbecken	17	große Fetthenne		morning			4180704	3687770	88.2093
2023-08-18	kneippbecken	17	große Fetthenne		morning
2023-08-18	kneippbecken	17	große Fetthenne		morning		area square	1	4180704
2023-08-18	kneippbecken	17	große Fetthenne		morning		area cultivar	2	3687770
2023-08-18	kneippbecken	17	große Fetthenne		morning		area cultivar		0
2023-08-18	kneippbecken	17	große Fetthenne		morning		area cultivar		0
2023-08-18	kneippbecken	17	große Fetthenne		morning		area cultivar		0
2023-08-18	kneippbecken	17	große Fetthenne		morning		area cultivar		0
2023-08-18	kneippbecken	17	große Fetthenne		morning		area cultivar		0
2023-08-18	kneippbecken	17	große Fetthenne		morning		area cultivar		0
2023-08-18	kneippbecken	17	große Fetthenne		morning		area cultivar		0
2023-08-18	kneippbecken	17	große Fetthenne		morning		area cultivar		0
2023-08-18	kneippbecken	17	große Fetthenne		morning		area cultivar		0
2023-08-18	kneippbecken	18	große Fetthenne		morning			square	area_cultivar
2023-08-18	kneippbecken	18	große Fetthenne		morning			5279232	4214379	79.8294
2023-08-18	kneippbecken	18	große Fetthenne		morning
2023-08-18	kneippbecken	18	große Fetthenne		morning		area square	1	5279232
2023-08-18	kneippbecken	18	große Fetthenne		morning		area cultivar	2	4214379
2023-08-18	kneippbecken	18	große Fetthenne		morning		area cultivar		0
2023-08-18	kneippbecken	18	große Fetthenne		morning		area cultivar		0
2023-08-18	kneippbecken	18	große Fetthenne		morning		area cultivar		0
2023-08-18	kneippbecken	18	große Fetthenne		morning		area cultivar		0
2023-08-18	kneippbecken	18	große Fetthenne		morning		area cultivar		0
2023-08-18	kneippbecken	18	große Fetthenne		morning		area cultivar		0
2023-08-18	kneippbecken	18	große Fetthenne		morning		area cultivar		0
2023-08-18	kneippbecken	18	große Fetthenne		morning		area cultivar		0
2023-08-18	kneippbecken	18	große Fetthenne		morning		area cultivar		0
2023-08-18	augsburger_strasse	19	Blauraute		morning			square	area_cultivar
2023-08-18	augsburger_strasse	19	Blauraute		morning			8216480	8216480	100
2023-08-18	augsburger_strasse	19	Blauraute		morning
2023-08-18	augsburger_strasse	19	Blauraute		morning		area square	1	8216480
2023-08-18	augsburger_strasse	19	Blauraute		morning		area cultivar	2	8216480
2023-08-18	augsburger_strasse	19	Blauraute		morning		area cultivar		0
2023-08-18	augsburger_strasse	19	Blauraute		morning		area cultivar		0
2023-08-18	augsburger_strasse	19	Blauraute		morning		area cultivar		0
2023-08-18	augsburger_strasse	19	Blauraute		morning		area cultivar		0
2023-08-18	augsburger_strasse	19	Blauraute		morning		area cultivar		0
2023-08-18	augsburger_strasse	19	Blauraute		morning		area cultivar		0
2023-08-18	augsburger_strasse	19	Blauraute		morning		area cultivar		0
2023-08-18	augsburger_strasse	19	Blauraute		morning		area cultivar		0
2023-08-18	augsburger_strasse	19	Blauraute		morning		area cultivar		0
2023-08-18	augsburger_strasse	20	Goldgarbe		morning			square	area_cultivar
2023-08-18	augsburger_strasse	20	Goldgarbe		morning			5380848	5380848	100
2023-08-18	augsburger_strasse	20	Goldgarbe		morning
2023-08-18	augsburger_strasse	20	Goldgarbe		morning		area square	1	5380848
2023-08-18	augsburger_strasse	20	Goldgarbe		morning		area cultivar	2	5380848
2023-08-18	augsburger_strasse	20	Goldgarbe		morning		area cultivar		0
2023-08-18	augsburger_strasse	20	Goldgarbe		morning		area cultivar		0
2023-08-18	augsburger_strasse	20	Goldgarbe		morning		area cultivar		0
2023-08-18	augsburger_strasse	20	Goldgarbe		morning		area cultivar		0
2023-08-18	augsburger_strasse	20	Goldgarbe		morning		area cultivar		0
2023-08-18	augsburger_strasse	20	Goldgarbe		morning		area cultivar		0
2023-08-18	augsburger_strasse	20	Goldgarbe		morning		area cultivar		0
2023-08-18	augsburger_strasse	20	Goldgarbe		morning		area cultivar		0
2023-08-18	augsburger_strasse	20	Goldgarbe		morning		area cultivar		0
2023-08-18	augsburger_strasse	21	Gartenhortensie		morning			square	area_cultivar
2023-08-18	augsburger_strasse	21	Gartenhortensie		morning			7923712	7923712	100
2023-08-18	augsburger_strasse	21	Gartenhortensie		morning
2023-08-18	augsburger_strasse	21	Gartenhortensie		morning		area square	1	7923712
2023-08-18	augsburger_strasse	21	Gartenhortensie		morning		area cultivar	2	7923712
2023-08-18	augsburger_strasse	21	Gartenhortensie		morning		area cultivar		0
2023-08-18	augsburger_strasse	21	Gartenhortensie		morning		area cultivar		0
2023-08-18	augsburger_strasse	21	Gartenhortensie		morning		area cultivar		0
2023-08-18	augsburger_strasse	21	Gartenhortensie		morning		area cultivar		0
2023-08-18	augsburger_strasse	21	Gartenhortensie		morning		area cultivar		0
2023-08-18	augsburger_strasse	21	Gartenhortensie		morning		area cultivar		0
2023-08-18	augsburger_strasse	21	Gartenhortensie		morning		area cultivar		0
2023-08-18	augsburger_strasse	21	Gartenhortensie		morning		area cultivar		0
2023-08-18	augsburger_strasse	21	Gartenhortensie		morning		area cultivar		0
2023-08-18	augsburger_strasse	22	X Sonnenhut		morning			square	area_cultivar
2023-08-18	augsburger_strasse	22	X Sonnenhut		morning			4059616	2853716	70.2952
2023-08-18	augsburger_strasse	22	X Sonnenhut		morning
2023-08-18	augsburger_strasse	22	X Sonnenhut		morning		area square	1	4059616
2023-08-18	augsburger_strasse	22	X Sonnenhut		morning		area cultivar	2	2853716
2023-08-18	augsburger_strasse	22	X Sonnenhut		morning		area cultivar		0
2023-08-18	augsburger_strasse	22	X Sonnenhut		morning		area cultivar		0
2023-08-18	augsburger_strasse	22	X Sonnenhut		morning		area cultivar		0
2023-08-18	augsburger_strasse	22	X Sonnenhut		morning		area cultivar		0
2023-08-18	augsburger_strasse	22	X Sonnenhut		morning		area cultivar		0
2023-08-18	augsburger_strasse	22	X Sonnenhut		morning		area cultivar		0
2023-08-18	augsburger_strasse	22	X Sonnenhut		morning		area cultivar		0
2023-08-18	augsburger_strasse	22	X Sonnenhut		morning		area cultivar		0
2023-08-18	augsburger_strasse	22	X Sonnenhut		morning		area cultivar		0
2023-08-18	augsburger_strasse	23	X Storchschnabel		morning			square	area_cultivar
2023-08-18	augsburger_strasse	23	X Storchschnabel		morning			4403456	3272522	74.3171
2023-08-18	augsburger_strasse	23	X Storchschnabel		morning
2023-08-18	augsburger_strasse	23	X Storchschnabel		morning		area square	1	4403456
2023-08-18	augsburger_strasse	23	X Storchschnabel		morning		area cultivar	2	3272522
2023-08-18	augsburger_strasse	23	X Storchschnabel		morning		area cultivar		0
2023-08-18	augsburger_strasse	23	X Storchschnabel		morning		area cultivar		0
2023-08-18	augsburger_strasse	23	X Storchschnabel		morning		area cultivar		0
2023-08-18	augsburger_strasse	23	X Storchschnabel		morning		area cultivar		0
2023-08-18	augsburger_strasse	23	X Storchschnabel		morning		area cultivar		0
2023-08-18	augsburger_strasse	23	X Storchschnabel		morning		area cultivar		0
2023-08-18	augsburger_strasse	23	X Storchschnabel		morning		area cultivar		0
2023-08-18	augsburger_strasse	23	X Storchschnabel		morning		area cultivar		0
2023-08-18	augsburger_strasse	23	X Storchschnabel		morning		area cultivar		0
2023-08-18	augsburger_strasse	24	Wiesensalbei		morning			square	area_cultivar
2023-08-18	augsburger_strasse	24	Wiesensalbei		morning			4756752	4375614	91.9874
2023-08-18	augsburger_strasse	24	Wiesensalbei		morning
2023-08-18	augsburger_strasse	24	Wiesensalbei		morning		area square	1	4756752
2023-08-18	augsburger_strasse	24	Wiesensalbei		morning		area cultivar	2	4375614
2023-08-18	augsburger_strasse	24	Wiesensalbei		morning		area cultivar		0
2023-08-18	augsburger_strasse	24	Wiesensalbei		morning		area cultivar		0
2023-08-18	augsburger_strasse	24	Wiesensalbei		morning		area cultivar		0
2023-08-18	augsburger_strasse	24	Wiesensalbei		morning		area cultivar		0
2023-08-18	augsburger_strasse	24	Wiesensalbei		morning		area cultivar		0
2023-08-18	augsburger_strasse	24	Wiesensalbei		morning		area cultivar		0
2023-08-18	augsburger_strasse	24	Wiesensalbei		morning		area cultivar		0
2023-08-18	augsburger_strasse	24	Wiesensalbei		morning		area cultivar		0
2023-08-18	augsburger_strasse	24	Wiesensalbei		morning		area cultivar		0
2023-08-18	augsburger_strasse	25	Pur Pur Sonnenhut rosa		morning			square	area_cultivar
2023-08-18	augsburger_strasse	25	Pur Pur Sonnenhut rosa		morning			3792498	2253652	59.4239
2023-08-18	augsburger_strasse	25	Pur Pur Sonnenhut rosa		morning
2023-08-18	augsburger_strasse	25	Pur Pur Sonnenhut rosa		morning		area square	1	3792498
2023-08-18	augsburger_strasse	25	Pur Pur Sonnenhut rosa		morning		area cultivar	2	2253652
2023-08-18	augsburger_strasse	25	Pur Pur Sonnenhut rosa		morning		area cultivar		0
2023-08-18	augsburger_strasse	25	Pur Pur Sonnenhut rosa		morning		area cultivar		0
2023-08-18	augsburger_strasse	25	Pur Pur Sonnenhut rosa		morning		area cultivar		0
2023-08-18	augsburger_strasse	25	Pur Pur Sonnenhut rosa		morning		area cultivar		0
2023-08-18	augsburger_strasse	25	Pur Pur Sonnenhut rosa		morning		area cultivar		0
2023-08-18	augsburger_strasse	25	Pur Pur Sonnenhut rosa		morning		area cultivar		0
2023-08-18	augsburger_strasse	25	Pur Pur Sonnenhut rosa		morning		area cultivar		0
2023-08-18	augsburger_strasse	25	Pur Pur Sonnenhut rosa		morning		area cultivar		0
2023-08-18	augsburger_strasse	25	Pur Pur Sonnenhut rosa		morning		area cultivar		0
2023-08-18	augsburger_strasse	26	A. ageratoides var. Adustuts		morning			square	area_cultivar
2023-08-18	augsburger_strasse	26	A. ageratoides var. Adustuts		morning			4116624	4116624	100
2023-08-18	augsburger_strasse	26	A. ageratoides var. Adustuts		morning
2023-08-18	augsburger_strasse	26	A. ageratoides var. Adustuts		morning		area square	1	4116624
2023-08-18	augsburger_strasse	26	A. ageratoides var. Adustuts		morning		area cultivar	2	4116624
2023-08-18	augsburger_strasse	26	A. ageratoides var. Adustuts		morning		area cultivar		0
2023-08-18	augsburger_strasse	26	A. ageratoides var. Adustuts		morning		area cultivar		0
2023-08-18	augsburger_strasse	26	A. ageratoides var. Adustuts		morning		area cultivar		0
2023-08-18	augsburger_strasse	26	A. ageratoides var. Adustuts		morning		area cultivar		0
2023-08-18	augsburger_strasse	26	A. ageratoides var. Adustuts		morning		area cultivar		0
2023-08-18	augsburger_strasse	26	A. ageratoides var. Adustuts		morning		area cultivar		0
2023-08-18	augsburger_strasse	26	A. ageratoides var. Adustuts		morning		area cultivar		0
2023-08-18	augsburger_strasse	26	A. ageratoides var. Adustuts		morning		area cultivar		0
2023-08-18	augsburger_strasse	26	A. ageratoides var. Adustuts		morning		area cultivar		0
2023-08-18	augsburger_strasse	27	X Sonnenhut		morning			square	area_cultivar
2023-08-18	augsburger_strasse	27	X Sonnenhut		morning			4789360	4789360	100
2023-08-18	augsburger_strasse	27	X Sonnenhut		morning
2023-08-18	augsburger_strasse	27	X Sonnenhut		morning		area square	1	4789360
2023-08-18	augsburger_strasse	27	X Sonnenhut		morning		area cultivar	2	4789360
2023-08-18	augsburger_strasse	27	X Sonnenhut		morning		area cultivar		0
2023-08-18	augsburger_strasse	27	X Sonnenhut		morning		area cultivar		0
2023-08-18	augsburger_strasse	27	X Sonnenhut		morning		area cultivar		0
2023-08-18	augsburger_strasse	27	X Sonnenhut		morning		area cultivar		0
2023-08-18	augsburger_strasse	27	X Sonnenhut		morning		area cultivar		0
2023-08-18	augsburger_strasse	27	X Sonnenhut		morning		area cultivar		0
2023-08-18	augsburger_strasse	27	X Sonnenhut		morning		area cultivar		0
2023-08-18	augsburger_strasse	27	X Sonnenhut		morning		area cultivar		0
2023-08-18	augsburger_strasse	27	X Sonnenhut		morning		area cultivar		0
2023-08-18	augsburger_strasse	28	X Sonnenhut		morning			square	area_cultivar
2023-08-18	augsburger_strasse	28	X Sonnenhut		morning			3352752	2712384	80.9002
2023-08-18	augsburger_strasse	28	X Sonnenhut		morning
2023-08-18	augsburger_strasse	28	X Sonnenhut		morning		area square	1	3352752
2023-08-18	augsburger_strasse	28	X Sonnenhut		morning		area cultivar	2	2712384
2023-08-18	augsburger_strasse	28	X Sonnenhut		morning		area cultivar		0
2023-08-18	augsburger_strasse	28	X Sonnenhut		morning		area cultivar		0
2023-08-18	augsburger_strasse	28	X Sonnenhut		morning		area cultivar		0
2023-08-18	augsburger_strasse	28	X Sonnenhut		morning		area cultivar		0
2023-08-18	augsburger_strasse	28	X Sonnenhut		morning		area cultivar		0
2023-08-18	augsburger_strasse	28	X Sonnenhut		morning		area cultivar		0
2023-08-18	augsburger_strasse	28	X Sonnenhut		morning		area cultivar		0
2023-08-18	augsburger_strasse	28	X Sonnenhut		morning		area cultivar		0
2023-08-18	augsburger_strasse	28	X Sonnenhut		morning		area cultivar		0
2023-08-18	augsburger_strasse	29	große Fetthenne		morning			square	area_cultivar
2023-08-18	augsburger_strasse	29	große Fetthenne		morning			4278672	3016955	70.5115
2023-08-18	augsburger_strasse	29	große Fetthenne		morning
2023-08-18	augsburger_strasse	29	große Fetthenne		morning		area square	1	4278672
2023-08-18	augsburger_strasse	29	große Fetthenne		morning		area cultivar	2	3016955
2023-08-18	augsburger_strasse	29	große Fetthenne		morning		area cultivar		0
2023-08-18	augsburger_strasse	29	große Fetthenne		morning		area cultivar		0
2023-08-18	augsburger_strasse	29	große Fetthenne		morning		area cultivar		0
2023-08-18	augsburger_strasse	29	große Fetthenne		morning		area cultivar		0
2023-08-18	augsburger_strasse	29	große Fetthenne		morning		area cultivar		0
2023-08-18	augsburger_strasse	29	große Fetthenne		morning		area cultivar		0
2023-08-18	augsburger_strasse	29	große Fetthenne		morning		area cultivar		0
2023-08-18	augsburger_strasse	29	große Fetthenne		morning		area cultivar		0
2023-08-18	augsburger_strasse	29	große Fetthenne		morning		area cultivar		0
2023-08-18	herzogspark	1	X Storchschnabel		afternoon			square	area_cultivar
2023-08-18	herzogspark	1	X Storchschnabel		afternoon			7299584	7299584	100
2023-08-18	herzogspark	1	X Storchschnabel		afternoon
2023-08-18	herzogspark	1	X Storchschnabel		afternoon		area square	1	7299584
2023-08-18	herzogspark	1	X Storchschnabel		afternoon		area cultivar	2	7299584
2023-08-18	herzogspark	1	X Storchschnabel		afternoon		area cultivar		0
2023-08-18	herzogspark	1	X Storchschnabel		afternoon		area cultivar		0
2023-08-18	herzogspark	1	X Storchschnabel		afternoon		area cultivar		0
2023-08-18	herzogspark	1	X Storchschnabel		afternoon		area cultivar		0
2023-08-18	herzogspark	1	X Storchschnabel		afternoon		area cultivar		0
2023-08-18	herzogspark	1	X Storchschnabel		afternoon		area cultivar		0
2023-08-18	herzogspark	1	X Storchschnabel		afternoon		area cultivar		0
2023-08-18	herzogspark	1	X Storchschnabel		afternoon		area cultivar		0
2023-08-18	herzogspark	1	X Storchschnabel		afternoon		area cultivar		0
2023-08-18	herzogspark	2	Lilien weiß		afternoon			square	area_cultivar
2023-08-18	herzogspark	2	Lilien weiß		afternoon			5820624	5283855	90.7782
2023-08-18	herzogspark	2	Lilien weiß		afternoon
2023-08-18	herzogspark	2	Lilien weiß		afternoon		area square	1	5820624
2023-08-18	herzogspark	2	Lilien weiß		afternoon		area cultivar	2	5283855
2023-08-18	herzogspark	2	Lilien weiß		afternoon		area cultivar		0
2023-08-18	herzogspark	2	Lilien weiß		afternoon		area cultivar		0
2023-08-18	herzogspark	2	Lilien weiß		afternoon		area cultivar		0
2023-08-18	herzogspark	2	Lilien weiß		afternoon		area cultivar		0
2023-08-18	herzogspark	2	Lilien weiß		afternoon		area cultivar		0
2023-08-18	herzogspark	2	Lilien weiß		afternoon		area cultivar		0
2023-08-18	herzogspark	2	Lilien weiß		afternoon		area cultivar		0
2023-08-18	herzogspark	2	Lilien weiß		afternoon		area cultivar		0
2023-08-18	herzogspark	2	Lilien weiß		afternoon		area cultivar		0
2023-08-18	herzogspark	3	Herbst-Anemone		afternoon			square	area_cultivar
2023-08-18	herzogspark	3	Herbst-Anemone		afternoon			2863966	2035624	71.0771
2023-08-18	herzogspark	3	Herbst-Anemone		afternoon
2023-08-18	herzogspark	3	Herbst-Anemone		afternoon		area square	1	2863966
2023-08-18	herzogspark	3	Herbst-Anemone		afternoon		area cultivar	2	2035624
2023-08-18	herzogspark	3	Herbst-Anemone		afternoon		area cultivar		0
2023-08-18	herzogspark	3	Herbst-Anemone		afternoon		area cultivar		0
2023-08-18	herzogspark	3	Herbst-Anemone		afternoon		area cultivar		0
2023-08-18	herzogspark	3	Herbst-Anemone		afternoon		area cultivar		0
2023-08-18	herzogspark	3	Herbst-Anemone		afternoon		area cultivar		0
2023-08-18	herzogspark	3	Herbst-Anemone		afternoon		area cultivar		0
2023-08-18	herzogspark	3	Herbst-Anemone		afternoon		area cultivar		0
2023-08-18	herzogspark	3	Herbst-Anemone		afternoon		area cultivar		0
2023-08-18	herzogspark	3	Herbst-Anemone		afternoon		area cultivar		0
2023-08-18	herzogspark	4	X Storchschnabel		afternoon			square	area_cultivar
2023-08-18	herzogspark	4	X Storchschnabel		afternoon			5961572	5095920	85.4795
2023-08-18	herzogspark	4	X Storchschnabel		afternoon
2023-08-18	herzogspark	4	X Storchschnabel		afternoon		area square	1	5961572
2023-08-18	herzogspark	4	X Storchschnabel		afternoon		area cultivar	2	5095920
2023-08-18	herzogspark	4	X Storchschnabel		afternoon		area cultivar		0
2023-08-18	herzogspark	4	X Storchschnabel		afternoon		area cultivar		0
2023-08-18	herzogspark	4	X Storchschnabel		afternoon		area cultivar		0
2023-08-18	herzogspark	4	X Storchschnabel		afternoon		area cultivar		0
2023-08-18	herzogspark	4	X Storchschnabel		afternoon		area cultivar		0
2023-08-18	herzogspark	4	X Storchschnabel		afternoon		area cultivar		0
2023-08-18	herzogspark	4	X Storchschnabel		afternoon		area cultivar		0
2023-08-18	herzogspark	4	X Storchschnabel		afternoon		area cultivar		0
2023-08-18	herzogspark	4	X Storchschnabel		afternoon		area cultivar		0
2023-08-18	herzogspark	5	Pur Pur Sonnenhut rosa		afternoon			square	area_cultivar
2023-08-18	herzogspark	5	Pur Pur Sonnenhut rosa		afternoon			4085984	4085984	100
2023-08-18	herzogspark	5	Pur Pur Sonnenhut rosa		afternoon
2023-08-18	herzogspark	5	Pur Pur Sonnenhut rosa		afternoon		area square	1	4085984
2023-08-18	herzogspark	5	Pur Pur Sonnenhut rosa		afternoon		area cultivar	2	4085984
2023-08-18	herzogspark	5	Pur Pur Sonnenhut rosa		afternoon		area cultivar		0
2023-08-18	herzogspark	5	Pur Pur Sonnenhut rosa		afternoon		area cultivar		0
2023-08-18	herzogspark	5	Pur Pur Sonnenhut rosa		afternoon		area cultivar		0
2023-08-18	herzogspark	5	Pur Pur Sonnenhut rosa		afternoon		area cultivar		0
2023-08-18	herzogspark	5	Pur Pur Sonnenhut rosa		afternoon		area cultivar		0
2023-08-18	herzogspark	5	Pur Pur Sonnenhut rosa		afternoon		area cultivar		0
2023-08-18	herzogspark	5	Pur Pur Sonnenhut rosa		afternoon		area cultivar		0
2023-08-18	herzogspark	5	Pur Pur Sonnenhut rosa		afternoon		area cultivar		0
2023-08-18	herzogspark	5	Pur Pur Sonnenhut rosa		afternoon		area cultivar		0
2023-08-18	herzogspark	6	Pur Pur Sonnenhut weiß		afternoon			square	area_cultivar
2023-08-18	herzogspark	6	Pur Pur Sonnenhut weiß		afternoon			5060016	3456758	68.3152
2023-08-18	herzogspark	6	Pur Pur Sonnenhut weiß		afternoon
2023-08-18	herzogspark	6	Pur Pur Sonnenhut weiß		afternoon		area square	1	5060016
2023-08-18	herzogspark	6	Pur Pur Sonnenhut weiß		afternoon		area cultivar	2	3456758
2023-08-18	herzogspark	6	Pur Pur Sonnenhut weiß		afternoon		area cultivar		0
2023-08-18	herzogspark	6	Pur Pur Sonnenhut weiß		afternoon		area cultivar		0
2023-08-18	herzogspark	6	Pur Pur Sonnenhut weiß		afternoon		area cultivar		0
2023-08-18	herzogspark	6	Pur Pur Sonnenhut weiß		afternoon		area cultivar		0
2023-08-18	herzogspark	6	Pur Pur Sonnenhut weiß		afternoon		area cultivar		0
2023-08-18	herzogspark	6	Pur Pur Sonnenhut weiß		afternoon		area cultivar		0
2023-08-18	herzogspark	6	Pur Pur Sonnenhut weiß		afternoon		area cultivar		0
2023-08-18	herzogspark	6	Pur Pur Sonnenhut weiß		afternoon		area cultivar		0
2023-08-18	herzogspark	6	Pur Pur Sonnenhut weiß		afternoon		area cultivar		0
2023-08-18	herzogspark	7	X Storchschnabel		afternoon			square	area_cultivar
2023-08-18	herzogspark	7	X Storchschnabel		afternoon			4232736	3320690	78.4526
2023-08-18	herzogspark	7	X Storchschnabel		afternoon
2023-08-18	herzogspark	7	X Storchschnabel		afternoon		area square	1	4232736
2023-08-18	herzogspark	7	X Storchschnabel		afternoon		area cultivar	2	3320690
2023-08-18	herzogspark	7	X Storchschnabel		afternoon		area cultivar		0
2023-08-18	herzogspark	7	X Storchschnabel		afternoon		area cultivar		0
2023-08-18	herzogspark	7	X Storchschnabel		afternoon		area cultivar		0
2023-08-18	herzogspark	7	X Storchschnabel		afternoon		area cultivar		0
2023-08-18	herzogspark	7	X Storchschnabel		afternoon		area cultivar		0
2023-08-18	herzogspark	7	X Storchschnabel		afternoon		area cultivar		0
2023-08-18	herzogspark	7	X Storchschnabel		afternoon		area cultivar		0
2023-08-18	herzogspark	7	X Storchschnabel		afternoon		area cultivar		0
2023-08-18	herzogspark	7	X Storchschnabel		afternoon		area cultivar		0
2023-08-18	herzogspark	8	X Sonnenhut		afternoon			square	area_cultivar
2023-08-18	herzogspark	8	X Sonnenhut		afternoon			5156032	3964547	76.8914
2023-08-18	herzogspark	8	X Sonnenhut		afternoon
2023-08-18	herzogspark	8	X Sonnenhut		afternoon		area square	1	5156032
2023-08-18	herzogspark	8	X Sonnenhut		afternoon		area cultivar	2	3964547
2023-08-18	herzogspark	8	X Sonnenhut		afternoon		area cultivar		0
2023-08-18	herzogspark	8	X Sonnenhut		afternoon		area cultivar		0
2023-08-18	herzogspark	8	X Sonnenhut		afternoon		area cultivar		0
2023-08-18	herzogspark	8	X Sonnenhut		afternoon		area cultivar		0
2023-08-18	herzogspark	8	X Sonnenhut		afternoon		area cultivar		0
2023-08-18	herzogspark	8	X Sonnenhut		afternoon		area cultivar		0
2023-08-18	herzogspark	8	X Sonnenhut		afternoon		area cultivar		0
2023-08-18	herzogspark	8	X Sonnenhut		afternoon		area cultivar		0
2023-08-18	herzogspark	8	X Sonnenhut		afternoon		area cultivar		0
2023-08-18	herzogspark	9	Glockenblume		afternoon			square	area_cultivar
2023-08-18	herzogspark	9	Glockenblume		afternoon			7377120	3044821	41.2738
2023-08-18	herzogspark	9	Glockenblume		afternoon
2023-08-18	herzogspark	9	Glockenblume		afternoon		area square	1	7377120
2023-08-18	herzogspark	9	Glockenblume		afternoon		area cultivar	2	3044821
2023-08-18	herzogspark	9	Glockenblume		afternoon		area cultivar		0
2023-08-18	herzogspark	9	Glockenblume		afternoon		area cultivar		0
2023-08-18	herzogspark	9	Glockenblume		afternoon		area cultivar		0
2023-08-18	herzogspark	9	Glockenblume		afternoon		area cultivar		0
2023-08-18	herzogspark	9	Glockenblume		afternoon		area cultivar		0
2023-08-18	herzogspark	9	Glockenblume		afternoon		area cultivar		0
2023-08-18	herzogspark	9	Glockenblume		afternoon		area cultivar		0
2023-08-18	herzogspark	9	Glockenblume		afternoon		area cultivar		0
2023-08-18	herzogspark	9	Glockenblume		afternoon		area cultivar		0
2023-08-18	herzogspark	10	Mehliger Salbei		afternoon			square	area_cultivar
2023-08-18	herzogspark	10	Mehliger Salbei		afternoon			4351456	4351456	100
2023-08-18	herzogspark	10	Mehliger Salbei		afternoon
2023-08-18	herzogspark	10	Mehliger Salbei		afternoon		area square	1	4351456
2023-08-18	herzogspark	10	Mehliger Salbei		afternoon		area cultivar	2	4351456
2023-08-18	herzogspark	10	Mehliger Salbei		afternoon		area cultivar		0
2023-08-18	herzogspark	10	Mehliger Salbei		afternoon		area cultivar		0
2023-08-18	herzogspark	10	Mehliger Salbei		afternoon		area cultivar		0
2023-08-18	herzogspark	10	Mehliger Salbei		afternoon		area cultivar		0
2023-08-18	herzogspark	10	Mehliger Salbei		afternoon		area cultivar		0
2023-08-18	herzogspark	10	Mehliger Salbei		afternoon		area cultivar		0
2023-08-18	herzogspark	10	Mehliger Salbei		afternoon		area cultivar		0
2023-08-18	herzogspark	10	Mehliger Salbei		afternoon		area cultivar		0
2023-08-18	herzogspark	10	Mehliger Salbei		afternoon		area cultivar		0
2023-08-18	herzogspark	11	Begonien weiß		afternoon			square	area_cultivar
2023-08-18	herzogspark	11	Begonien weiß		afternoon			5785344	3002287	51.8947
2023-08-18	herzogspark	11	Begonien weiß		afternoon
2023-08-18	herzogspark	11	Begonien weiß		afternoon		area square	1	5785344
2023-08-18	herzogspark	11	Begonien weiß		afternoon		area cultivar	2	3002287
2023-08-18	herzogspark	11	Begonien weiß		afternoon		area cultivar		0
2023-08-18	herzogspark	11	Begonien weiß		afternoon		area cultivar		0
2023-08-18	herzogspark	11	Begonien weiß		afternoon		area cultivar		0
2023-08-18	herzogspark	11	Begonien weiß		afternoon		area cultivar		0
2023-08-18	herzogspark	11	Begonien weiß		afternoon		area cultivar		0
2023-08-18	herzogspark	11	Begonien weiß		afternoon		area cultivar		0
2023-08-18	herzogspark	11	Begonien weiß		afternoon		area cultivar		0
2023-08-18	herzogspark	11	Begonien weiß		afternoon		area cultivar		0
2023-08-18	herzogspark	11	Begonien weiß		afternoon		area cultivar		0
2023-08-18	herzogspark	12	Salvien rot		afternoon			square	area_cultivar
2023-08-18	herzogspark	12	Salvien rot		afternoon			5980016	2988786	49.9796
2023-08-18	herzogspark	12	Salvien rot		afternoon
2023-08-18	herzogspark	12	Salvien rot		afternoon		area square	1	5980016
2023-08-18	herzogspark	12	Salvien rot		afternoon		area cultivar	2	425923
2023-08-18	herzogspark	12	Salvien rot		afternoon		area cultivar	3	2562863
2023-08-18	herzogspark	12	Salvien rot		afternoon		area cultivar		0
2023-08-18	herzogspark	12	Salvien rot		afternoon		area cultivar		0
2023-08-18	herzogspark	12	Salvien rot		afternoon		area cultivar		0
2023-08-18	herzogspark	12	Salvien rot		afternoon		area cultivar		0
2023-08-18	herzogspark	12	Salvien rot		afternoon		area cultivar		0
2023-08-18	herzogspark	12	Salvien rot		afternoon		area cultivar		0
2023-08-18	herzogspark	12	Salvien rot		afternoon		area cultivar		0
2023-08-18	herzogspark	12	Salvien rot		afternoon		area cultivar		0
2023-08-18	herzogspark	13	Salvien lila		afternoon			square	area_cultivar
2023-08-18	herzogspark	13	Salvien lila		afternoon			5610384	1967874	35.0756
2023-08-18	herzogspark	13	Salvien lila		afternoon
2023-08-18	herzogspark	13	Salvien lila		afternoon		area square	1	5610384
2023-08-18	herzogspark	13	Salvien lila		afternoon		area cultivar	2	1068926
2023-08-18	herzogspark	13	Salvien lila		afternoon		area cultivar	3	898948
2023-08-18	herzogspark	13	Salvien lila		afternoon		area cultivar		0
2023-08-18	herzogspark	13	Salvien lila		afternoon		area cultivar		0
2023-08-18	herzogspark	13	Salvien lila		afternoon		area cultivar		0
2023-08-18	herzogspark	13	Salvien lila		afternoon		area cultivar		0
2023-08-18	herzogspark	13	Salvien lila		afternoon		area cultivar		0
2023-08-18	herzogspark	13	Salvien lila		afternoon		area cultivar		0
2023-08-18	herzogspark	13	Salvien lila		afternoon		area cultivar		0
2023-08-18	herzogspark	13	Salvien lila		afternoon		area cultivar		0
2023-08-18	herzogspark	14	Herbst-Anemone		afternoon			square	area_cultivar
2023-08-18	herzogspark	14	Herbst-Anemone		afternoon			5747800	4790527	83.3454
2023-08-18	herzogspark	14	Herbst-Anemone		afternoon
2023-08-18	herzogspark	14	Herbst-Anemone		afternoon		area square	1	5747800
2023-08-18	herzogspark	14	Herbst-Anemone		afternoon		area cultivar	2	4790527
2023-08-18	herzogspark	14	Herbst-Anemone		afternoon		area cultivar		0
2023-08-18	herzogspark	14	Herbst-Anemone		afternoon		area cultivar		0
2023-08-18	herzogspark	14	Herbst-Anemone		afternoon		area cultivar		0
2023-08-18	herzogspark	14	Herbst-Anemone		afternoon		area cultivar		0
2023-08-18	herzogspark	14	Herbst-Anemone		afternoon		area cultivar		0
2023-08-18	herzogspark	14	Herbst-Anemone		afternoon		area cultivar		0
2023-08-18	herzogspark	14	Herbst-Anemone		afternoon		area cultivar		0
2023-08-18	herzogspark	14	Herbst-Anemone		afternoon		area cultivar		0
2023-08-18	herzogspark	14	Herbst-Anemone		afternoon		area cultivar		0
2023-08-18	herzogspark	15	Gartenhortensie		afternoon			square	area_cultivar
2023-08-18	herzogspark	15	Gartenhortensie		afternoon			4530288	4156255	91.7437
2023-08-18	herzogspark	15	Gartenhortensie		afternoon
2023-08-18	herzogspark	15	Gartenhortensie		afternoon		area square	1	4530288
2023-08-18	herzogspark	15	Gartenhortensie		afternoon		area cultivar	2	4156255
2023-08-18	herzogspark	15	Gartenhortensie		afternoon		area cultivar		0
2023-08-18	herzogspark	15	Gartenhortensie		afternoon		area cultivar		0
2023-08-18	herzogspark	15	Gartenhortensie		afternoon		area cultivar		0
2023-08-18	herzogspark	15	Gartenhortensie		afternoon		area cultivar		0
2023-08-18	herzogspark	15	Gartenhortensie		afternoon		area cultivar		0
2023-08-18	herzogspark	15	Gartenhortensie		afternoon		area cultivar		0
2023-08-18	herzogspark	15	Gartenhortensie		afternoon		area cultivar		0
2023-08-18	herzogspark	15	Gartenhortensie		afternoon		area cultivar		0
2023-08-18	herzogspark	15	Gartenhortensie		afternoon		area cultivar		0
2023-08-18	herzogspark	16	Phlox		afternoon			square	area_cultivar
2023-08-18	herzogspark	16	Phlox		afternoon			4386585	3849388	87.7536
2023-08-18	herzogspark	16	Phlox		afternoon
2023-08-18	herzogspark	16	Phlox		afternoon		area square	1	4386585
2023-08-18	herzogspark	16	Phlox		afternoon		area cultivar	2	3849388
2023-08-18	herzogspark	16	Phlox		afternoon		area cultivar		0
2023-08-18	herzogspark	16	Phlox		afternoon		area cultivar		0
2023-08-18	herzogspark	16	Phlox		afternoon		area cultivar		0
2023-08-18	herzogspark	16	Phlox		afternoon		area cultivar		0
2023-08-18	herzogspark	16	Phlox		afternoon		area cultivar		0
2023-08-18	herzogspark	16	Phlox		afternoon		area cultivar		0
2023-08-18	herzogspark	16	Phlox		afternoon		area cultivar		0
2023-08-18	herzogspark	16	Phlox		afternoon		area cultivar		0
2023-08-18	herzogspark	16	Phlox		afternoon		area cultivar		0
2023-08-18	herzogspark	17	Waldeibisch		afternoon			square	area_cultivar
2023-08-18	herzogspark	17	Waldeibisch		afternoon			5147712	5147712	100
2023-08-18	herzogspark	17	Waldeibisch		afternoon
2023-08-18	herzogspark	17	Waldeibisch		afternoon		area square	1	5147712
2023-08-18	herzogspark	17	Waldeibisch		afternoon		area cultivar	2	5147712
2023-08-18	herzogspark	17	Waldeibisch		afternoon		area cultivar		0
2023-08-18	herzogspark	17	Waldeibisch		afternoon		area cultivar		0
2023-08-18	herzogspark	17	Waldeibisch		afternoon		area cultivar		0
2023-08-18	herzogspark	17	Waldeibisch		afternoon		area cultivar		0
2023-08-18	herzogspark	17	Waldeibisch		afternoon		area cultivar		0
2023-08-18	herzogspark	17	Waldeibisch		afternoon		area cultivar		0
2023-08-18	herzogspark	17	Waldeibisch		afternoon		area cultivar		0
2023-08-18	herzogspark	17	Waldeibisch		afternoon		area cultivar		0
2023-08-18	herzogspark	17	Waldeibisch		afternoon		area cultivar		0
2023-08-18	herzogspark	18	Herbst-Anemone		afternoon			square	area_cultivar
2023-08-18	herzogspark	18	Herbst-Anemone		afternoon			6829056	4300611	62.9752
2023-08-18	herzogspark	18	Herbst-Anemone		afternoon
2023-08-18	herzogspark	18	Herbst-Anemone		afternoon		area square	1	6829056
2023-08-18	herzogspark	18	Herbst-Anemone		afternoon		area cultivar	2	4300611
2023-08-18	herzogspark	18	Herbst-Anemone		afternoon		area cultivar		0
2023-08-18	herzogspark	18	Herbst-Anemone		afternoon		area cultivar		0
2023-08-18	herzogspark	18	Herbst-Anemone		afternoon		area cultivar		0
2023-08-18	herzogspark	18	Herbst-Anemone		afternoon		area cultivar		0
2023-08-18	herzogspark	18	Herbst-Anemone		afternoon		area cultivar		0
2023-08-18	herzogspark	18	Herbst-Anemone		afternoon		area cultivar		0
2023-08-18	herzogspark	18	Herbst-Anemone		afternoon		area cultivar		0
2023-08-18	herzogspark	18	Herbst-Anemone		afternoon		area cultivar		0
2023-08-18	herzogspark	18	Herbst-Anemone		afternoon		area cultivar		0
2023-08-18	neupfarrplatz	19	Lilien gelb		afternoon			square	area_cultivar
2023-08-18	neupfarrplatz	19	Lilien gelb		afternoon			2584128	2584128	100
2023-08-18	neupfarrplatz	19	Lilien gelb		afternoon
2023-08-18	neupfarrplatz	19	Lilien gelb		afternoon		area square	1	2584128
2023-08-18	neupfarrplatz	19	Lilien gelb		afternoon		area cultivar	2	2584128
2023-08-18	neupfarrplatz	19	Lilien gelb		afternoon		area cultivar		0
2023-08-18	neupfarrplatz	19	Lilien gelb		afternoon		area cultivar		0
2023-08-18	neupfarrplatz	19	Lilien gelb		afternoon		area cultivar		0
2023-08-18	neupfarrplatz	19	Lilien gelb		afternoon		area cultivar		0
2023-08-18	neupfarrplatz	19	Lilien gelb		afternoon		area cultivar		0
2023-08-18	neupfarrplatz	19	Lilien gelb		afternoon		area cultivar		0
2023-08-18	neupfarrplatz	19	Lilien gelb		afternoon		area cultivar		0
2023-08-18	neupfarrplatz	19	Lilien gelb		afternoon		area cultivar		0
2023-08-18	neupfarrplatz	19	Lilien gelb		afternoon		area cultivar		0
2023-08-18	neupfarrplatz	20	Petunien rosa gelb		afternoon			square	area_cultivar
2023-08-18	neupfarrplatz	20	Petunien rosa gelb		afternoon			6924240	4569744	65.9963
2023-08-18	neupfarrplatz	20	Petunien rosa gelb		afternoon
2023-08-18	neupfarrplatz	20	Petunien rosa gelb		afternoon		area square	1	6924240
2023-08-18	neupfarrplatz	20	Petunien rosa gelb		afternoon		area cultivar	2	4569744
2023-08-18	neupfarrplatz	20	Petunien rosa gelb		afternoon		area cultivar		0
2023-08-18	neupfarrplatz	20	Petunien rosa gelb		afternoon		area cultivar		0
2023-08-18	neupfarrplatz	20	Petunien rosa gelb		afternoon		area cultivar		0
2023-08-18	neupfarrplatz	20	Petunien rosa gelb		afternoon		area cultivar		0
2023-08-18	neupfarrplatz	20	Petunien rosa gelb		afternoon		area cultivar		0
2023-08-18	neupfarrplatz	20	Petunien rosa gelb		afternoon		area cultivar		0
2023-08-18	neupfarrplatz	20	Petunien rosa gelb		afternoon		area cultivar		0
2023-08-18	neupfarrplatz	20	Petunien rosa gelb		afternoon		area cultivar		0
2023-08-18	neupfarrplatz	20	Petunien rosa gelb		afternoon		area cultivar		0
2023-08-18	neupfarrplatz	21	Petunien lila weiß		afternoon			square	area_cultivar
2023-08-18	neupfarrplatz	21	Petunien lila weiß		afternoon			6651504	4090600	61.4989
2023-08-18	neupfarrplatz	21	Petunien lila weiß		afternoon
2023-08-18	neupfarrplatz	21	Petunien lila weiß		afternoon		area square	1	6651504
2023-08-18	neupfarrplatz	21	Petunien lila weiß		afternoon		area cultivar	2	4090600
2023-08-18	neupfarrplatz	21	Petunien lila weiß		afternoon		area cultivar		0
2023-08-18	neupfarrplatz	21	Petunien lila weiß		afternoon		area cultivar		0
2023-08-18	neupfarrplatz	21	Petunien lila weiß		afternoon		area cultivar		0
2023-08-18	neupfarrplatz	21	Petunien lila weiß		afternoon		area cultivar		0
2023-08-18	neupfarrplatz	21	Petunien lila weiß		afternoon		area cultivar		0
2023-08-18	neupfarrplatz	21	Petunien lila weiß		afternoon		area cultivar		0
2023-08-18	neupfarrplatz	21	Petunien lila weiß		afternoon		area cultivar		0
2023-08-18	neupfarrplatz	21	Petunien lila weiß		afternoon		area cultivar		0
2023-08-18	neupfarrplatz	21	Petunien lila weiß		afternoon		area cultivar		0
2023-08-18	neupfarrplatz	22	Mehliger Salbei		afternoon			square	area_cultivar
2023-08-18	neupfarrplatz	22	Mehliger Salbei		afternoon			5373408	5373408	100
2023-08-18	neupfarrplatz	22	Mehliger Salbei		afternoon
2023-08-18	neupfarrplatz	22	Mehliger Salbei		afternoon		area square	1	5373408
2023-08-18	neupfarrplatz	22	Mehliger Salbei		afternoon		area cultivar	2	5373408
2023-08-18	neupfarrplatz	22	Mehliger Salbei		afternoon		area cultivar		0
2023-08-18	neupfarrplatz	22	Mehliger Salbei		afternoon		area cultivar		0
2023-08-18	neupfarrplatz	22	Mehliger Salbei		afternoon		area cultivar		0
2023-08-18	neupfarrplatz	22	Mehliger Salbei		afternoon		area cultivar		0
2023-08-18	neupfarrplatz	22	Mehliger Salbei		afternoon		area cultivar		0
2023-08-18	neupfarrplatz	22	Mehliger Salbei		afternoon		area cultivar		0
2023-08-18	neupfarrplatz	22	Mehliger Salbei		afternoon		area cultivar		0
2023-08-18	neupfarrplatz	22	Mehliger Salbei		afternoon		area cultivar		0
2023-08-18	neupfarrplatz	22	Mehliger Salbei		afternoon		area cultivar		0
2023-08-18	neupfarrplatz	23	Spinnenblume		afternoon			square	area_cultivar
2023-08-18	neupfarrplatz	23	Spinnenblume		afternoon			5686512	5047856	88.7689
2023-08-18	neupfarrplatz	23	Spinnenblume		afternoon
2023-08-18	neupfarrplatz	23	Spinnenblume		afternoon		area square	1	5686512
2023-08-18	neupfarrplatz	23	Spinnenblume		afternoon		area cultivar	2	5047856
2023-08-18	neupfarrplatz	23	Spinnenblume		afternoon		area cultivar		0
2023-08-18	neupfarrplatz	23	Spinnenblume		afternoon		area cultivar		0
2023-08-18	neupfarrplatz	23	Spinnenblume		afternoon		area cultivar		0
2023-08-18	neupfarrplatz	23	Spinnenblume		afternoon		area cultivar		0
2023-08-18	neupfarrplatz	23	Spinnenblume		afternoon		area cultivar		0
2023-08-18	neupfarrplatz	23	Spinnenblume		afternoon		area cultivar		0
[truncated: 8,389 more rows]
[truncated: 1 more columns]
